# Supplementary material for: A Maize Necrotic Leaf Mutant Caused by Defect of Coproporphyrinogen III Oxidase in the Porphyrin Pathway
Source: MDPI journal article supplement (doi:10.3390/genes13020272), 2022-01-29
Supplement: s1 [file s1]

**Article title: A Maize *necrotic leaf mutant* Caused by Defective of Coproporphyrinogen III Oxidase in the porphyrin pathway**

**Authors:** Yan Zhao<sup>1,2</sup>, Wei Xu<sup>2</sup>, Li Jing Wang<sup>3</sup>, Shuai Han<sup>2</sup>, Yong Zhong Zhang<sup>2</sup>, Qing Zhi Liu<sup>2</sup>, Bao Shen Liu<sup>2\*</sup>, Xiang Yu Zhao<sup>1\*</sup>

**Supplementary Tables**

**Table S1.** Markers used in this research.

| Gene                                       | Primers       | Forward primer (5'-3')     | Reverse primer (5'-3')   |
|--------------------------------------------|---------------|----------------------------|--------------------------|
| For <i>necrotic4</i><br>sequencing         | <i>Nec4-1</i> | GGAGAGTTAGGGTTGAGTTGTTTATG | CGTGTCAAGTTAGGTTTTTTTGTG |
|                                            | <i>Nec4-2</i> | GCCGGACTGCAACACACGAC       | CCACCAGAGAATGCCCAAGA     |
|                                            | <i>Nec4-3</i> | AGCTAGTCCCTCCTTTCTAATTTA   | CACTGGGTCTGTTCTCTTTTTTT  |
|                                            | <i>Nec4-4</i> | GCCCACGCCGCTCATT           | CTTCACCCCAAGAACCATT      |
|                                            | <i>Nec4-5</i> | CGGTGGCAGACACATTGAAG       | GCCGGGCTATCGGAAGAA       |
| For<br><i>Zm00001d002359</i><br>sequencing | YS-1          | TCACTACTGCCTCAGCCATT       | GTCCAGCGTCCATATTCTCA     |
| For<br><i>Zm00001d002360</i><br>sequencing | <i>EP-P</i>   | TGGTATTAACCGAGGAGCTG       | AAGACACGTTGCGGTACAAG     |
|                                            | <i>EP-1</i>   | AGCTTGTACCGCAACGTGTC       | TGCATCTGCGATCAGGAGAG     |
| For<br><i>Zm00001d002361</i><br>sequencing | <i>MA-P1</i>  | TGCTCTCCGCTATAATGCAC       | CCATTGACATCTCTACTCGG     |
|                                            | <i>MA-P2</i>  | CCGAGTAGAGATGTCAATGG       | GGACGAACAAGCAAGAGGA      |
|                                            | <i>MA-1</i>   | TTAGTCCTTACCTACAGCGG       | CATAGTCAAGAACACGAGCC     |
|                                            | <i>MA-2</i>   | GCTCGTGTTCTTGACTATGC       | GATCTTGCTGGTTCTTGTTGG    |
|                                            | <i>MA-3</i>   | CCACAAGAACCAGCAAGATC       | AGAGAGTCATTGAACACCGC     |
|                                            | <i>MA-4</i>   | CGGTGTTCAATGACTCTCTC       | GCAAGCACTCTTCAGTAACC     |
|                                            | <i>MA-5</i>   | GGTACTGAAGAGTGCTTGC        | AGGAGAACGTCACGAGACAT     |
| For<br><i>Zm00001d002362</i><br>sequencing | <i>H15-1</i>  | AAAACATCTCCTAAACTCTCCC     | CTTCCCACCTGATCATTAACTAC  |
|                                            | <i>H15-2</i>  | GAGGATGATGAAGAGGAGGAG      | TGGAACCAATGGAAGATGTAA    |
|                                            | <i>H15-3</i>  | TATGTTTTGGTTGTCCTTTGGG     | AACTATGGTGATTACCTGTTGCA  |
|                                            | <i>H15-4</i>  | CATTATTTATTATTTGGGAGGA     | GAGATGTATGAACGATTTTGAG   |
|                                            | <i>H15-5</i>  | CTTATTTTATGCTGGCTTTTCTT    | TGTCTTTATACCCGTATCTGTGC  |

|             |                       |                          |                         |
|-------------|-----------------------|--------------------------|-------------------------|
|             | <i>H15-6</i>          | AGGTTCCCTTTTCCAACGTGTATG | CTCGGTGTTTAGGCTTTTGTCTT |
| For qRT-PCR | <i>Nect-RT</i>        | ATTGCGGAGAGGTCGTTATG     | TAAGTGGAAGGGACACAAGTATG |
|             | <i>ACTIN</i>          | TCACCCTGTGCTGCTGACCG     | GAACCGTGTGGCTCACACCA    |
|             | <i>Zm00001d038806</i> | GATGAAGTCGGACATCCTGATC   | CTCCTCCATGATCCTCATCTTC  |
|             | <i>Zm00001d039566</i> | CTTCGGTTTCGTATGAACCATG   | TGTCAGGATAACGTGTGTAGTC  |
|             | <i>Zm00001d010411</i> | CTATCCTTACACAGTCCGGTAC   | TGTCCATAGACGATGTACCAAG  |
|             | <i>Zm00001d022550</i> | GCATTTGATTTCTTTGCAGGTG   | AGTGGGACGACATTGTCTGAA   |
|             | <i>Zm00001d012731</i> | TTGCTCTAAAAGTACCGGCTAT   | GCGATGAACAGAGTATTCACAC  |
|             | <i>Zm00001d039624</i> | TTTGTTTGAGAGTTCATGGCTC   | AGTGTTACGACGAAACAAACAG  |
|             | <i>Zm00001d008841</i> | CTGTGCTTCTGAACTTTGTGT    | AGCAAAAACCCCAGTCGATATA  |
|             | <i>Zm00001d031064</i> | GTTTTTGTAAGCGCGAAAAGAC   | TTCCAAGAGAAGCTGGTTATT   |
|             | <i>Zm00001d051556</i> | GGCTTCAACATGATGCACTC     | GATGCCGAGGTATCCGTAC     |
|             | <i>Zm00001d020717</i> | GGAGCTGAGGAAGAATTACTCC   | CTGCATCGCCTTGTAAATGGAG  |

**Table S2.** The expression value of 10 selected genes in RNA-seq and qRT-PCR.

| Genes                 | RNA-seq |              | qRT-PCR |              | Gene name                             |
|-----------------------|---------|--------------|---------|--------------|---------------------------------------|
|                       | WT      | <i>nec-t</i> | WT      | <i>nec-t</i> |                                       |
| <i>Zm00001d038806</i> | 1       | 44.592       | 1       | 28.9         | heat-shock_protein_101                |
| <i>Zm00001d039566</i> | 1       | 99.073       | 1       | 120.54       | heat_shock_protein18f                 |
| <i>Zm00001d010411</i> | 1       | 0.112        | 1       | 0.067        | Aux/IAA-transcription_factor_38       |
| <i>Zm00001d022550</i> | 1       | 0.097        | 1       | 0.022        | bZIP-transcription_factor_92          |
| <i>Zm00001d012731</i> | 1       | 0.343        | 1       | 0.166        | ARF-transcription_factor_26           |
| <i>Zm00001d039624</i> | 1       | 0.291        | 1       | 0.207        | Aux/IAA-transcription_factor_8        |
| <i>Zm00001d008841</i> | 1       | 222.86       | 1       | 117.90       | heat_shock_protein18c                 |
| <i>Zm00001d031064</i> | 1       | 0.486        | 1       | 0.075        | ARF-transcription_factor_34           |
| <i>Zm00001d051556</i> | 1       | 0.027        | 1       | 0.019        | nine-cis-epoxycarotenoid_dioxygenase6 |
| <i>Zm00001d020717</i> | 1       | 0.244        | 1       | 0.036        | abscisic_acid_8'-hydroxylase4         |
