# Supplementary material for: A Maize Necrotic Leaf Mutant Caused by Defect of Coproporphyrinogen III Oxidase in the Porphyrin Pathway
Source: MDPI journal article supplement (doi:10.3390/genes13020272), 2022-01-29
Supplement: s1 [file s1]

**Article title: A Maize *necrotic leaf* mutant Caused by Defective of Coproporphyrinogen III Oxidase in the porphyrin pathway**

**Authors:** Yan Zhao<sup>1,2</sup>, Wei Xu<sup>2</sup>, Li Jing Wang<sup>3</sup>, Shuai Han<sup>2</sup>, Yong Zhong Zhang<sup>2</sup>, Qing Zhi Liu<sup>2</sup>, Bao Shen Liu<sup>2\*</sup>, Xiang Yu Zhao<sup>1\*</sup>

**Supplementary Figures**

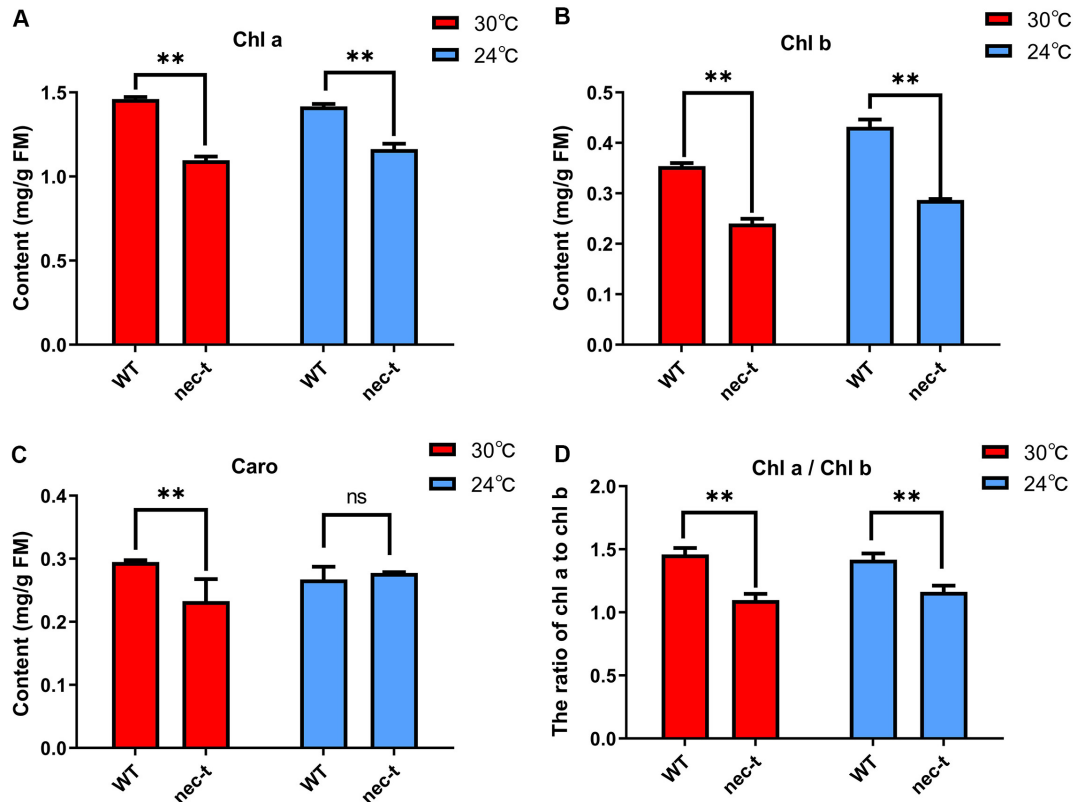

**Supplementary Figure S1.** Photosynthetic pigment content in the leaves of WT and *nec-t* mutant plants under different temperatures. (A) Chl a content at different temperatures. (B) Chl b content at different temperatures. (C) Caro content at different temperatures. (D) The ratio of chl a to chl b under different temperature conditions. Error bars indicating SD were obtained from three biological repeats. \*\*  $P < 0.01$  (Student's t-test), NS  $P > 0.01$  (Student's t-test).

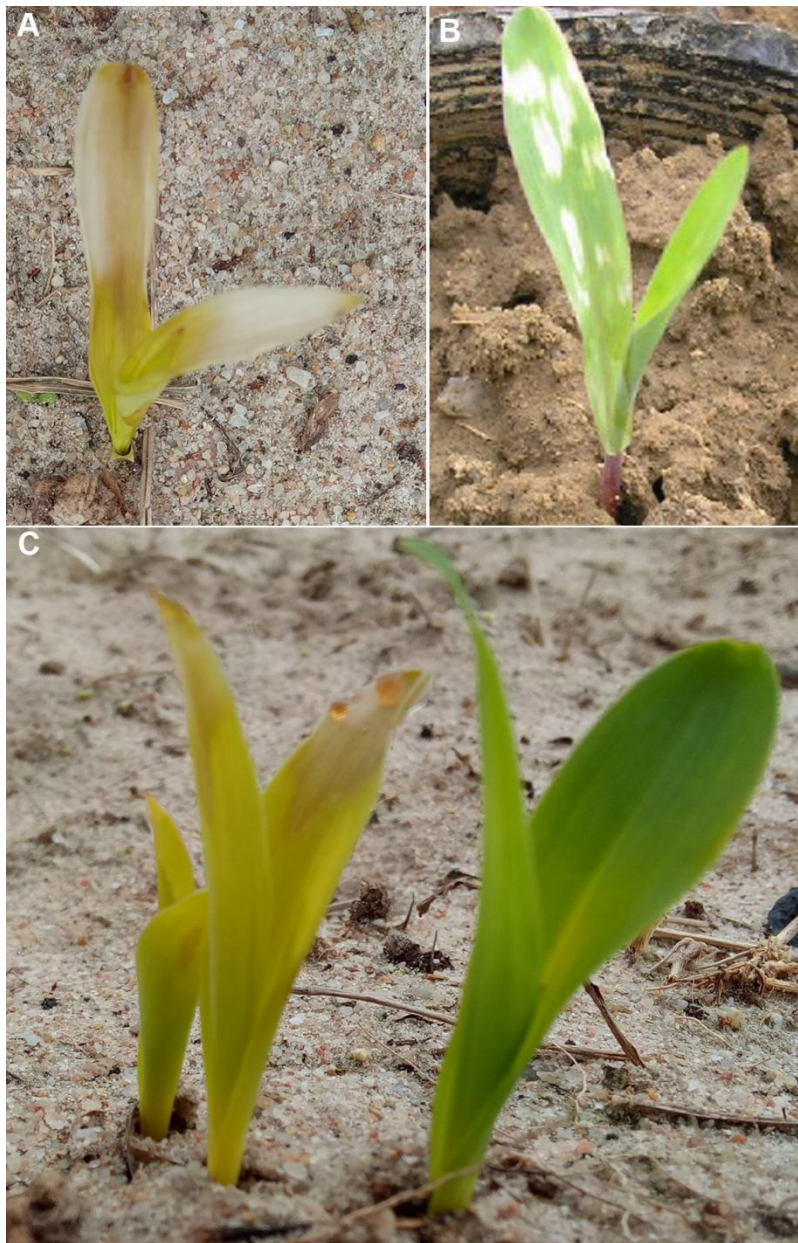

**Supplementary Figure S2.** Allelic complementation analysis. (A) Phenotype of the *nec4* mutant; (B) Phenotype of the *nec-t* mutant; (C) Phenotype of mutant plants from the filial generation produced from *nec4* and *nec-t* hybridization.

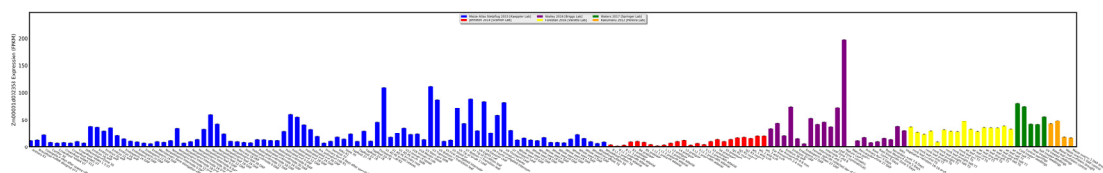

**Supplementary Figure S3.** The expression pattern of *necrotic4* from the publicly available Maize Gene Expression database (qTell). Different colors represent different processing conditions.
