# Supplementary material for: A Maize Necrotic Leaf Mutant Caused by Defect of Coproporphyrinogen III Oxidase in the Porphyrin Pathway
Source: Genes (Basel). 2022 Jan 29;13(2):272. doi: 10.3390/genes13020272 (PMC8872553; doi:10.3390/genes13020272)
Supplement: Supplementary file 1 [file genes-13-00272-s001.zip]

Archive with 4 entries (4 files):
- Excel S1.xls
- Excel S2.xls
- Supplementary Figure.pdf
- Supplementary Tables.pdf
