# Supplementary material for: A Maize Necrotic Leaf Mutant Caused by Defect of Coproporphyrinogen III Oxidase in the Porphyrin Pathway
Source: Genes (Basel). 2022 Jan 29;13(2):272. doi: 10.3390/genes13020272 (PMC8872553; doi:10.3390/genes13020272)
Supplement: Supplementary file 1 [file genes-13-00272-s001.zip › Excel S1.xls]

gene_id	nect_1	nect_2	nect_3	WT_1	WT_2	WT_3	nect	WT	log2FoldChange	pvalue	padj	gene_name	gene_chr	gene_start	gene_end	gene_strand	gene_length	gene_biotype	gene_description	tf_family
gene:Zm00001d035409	189.8906883	179.4676203	136.8771428	2349.183522	4691.347575	7255.213637	168.7451505	4765.248245	-4.819811293	1.54E-24	3.91E-20	-	6	24606673	24607624	-	813	-	NA	-
gene:Zm00001d001915	343.7676254	537.5400357	792.3451504	22.75238278	18.08276589	12.81354749	557.8842705	17.88289872	4.965124994	6.58E-24	8.35E-20	-	2	2812723	2813940	-	1063	-	NA	HMA
gene:Zm00001d007084	1.091325795	0.862825097	0.963923541	806.7615726	561.6959154	495.152085	0.972691478	621.203191	-9.330760164	1.08E-23	9.17E-20	-	2	221914642	221915449	+	808	-	NA	Histone
gene:Zm00001d008200	0	0	0	833.3060192	1230.758253	762.4060754	0	942.1567827	-12.36884651	4.95E-23	3.14E-19	proteolipid_membrane_potential_regulator7	8	985128	985854	-	573	-	NA	-
gene:Zm00001d046471	362.3201639	440.0407997	1050.676659	6.636111643	1.130172868	9.152533919	617.6792076	5.639606143	6.743620819	7.46E-23	3.78E-19	-	9	91463414	91463893	+	480	-	NA	-
gene:Zm00001d013511	541.2975942	842.1172951	418.3428167	0	0	0	600.585902	0	11.682574	3.56E-20	1.51E-16	-	5	13212888	13216542	+	2612	-	NA	-
gene:Zm00001d006443	3.273977384	8.628250975	3.855694163	165.9027911	231.685438	315.7624202	5.252640841	237.7835497	-5.471288909	5.13E-20	1.83E-16	-	2	208320521	208366475	+	4340	-	NA	UvrD-helicase
gene:Zm00001d014292	510.740472	581.5441157	874.2786514	57.82897289	64.41985348	56.7457103	655.5210797	59.66484556	3.458980779	5.78E-20	1.83E-16	-	5	39727457	39730682	-	2020	-	NA	-
gene:Zm00001d024903	326.3064127	599.6634428	2439.690481	13.27222329	13.56207442	11.89829409	1121.886779	12.91086393	6.442289302	6.68E-19	1.88E-15	heat_shock_protein%2C_90_kDa	10	93908317	93911235	+	2792	-	NA	HATPase_c
gene:Zm00001d006766	0	0	0	273.9766093	447.5484558	591.2536912	0	437.5929187	-11.26276011	1.18E-18	2.84E-15	-	2	216328223	216329894	-	434	-	NA	-
gene:Zm00001d022032	1303.042999	209.6664987	427.9820521	10.42817544	5.65086434	6.406773743	646.8971833	7.495271174	6.425430506	1.23E-18	2.84E-15	ribosome-inactivating_protein2	7	168319347	168320506	-	1160	-	NA	-
gene:Zm00001d008211	1.091325795	2.588475292	0	267.3404976	201.1707705	166.5761173	1.226600362	211.6957952	-7.376342068	1.65E-17	3.48E-14	-	8	1299092	1300668	-	766	-	NA	-
gene:Zm00001d032808	0	0	0	230.3678756	340.1820333	1413.151237	0	661.2337153	-11.85850016	2.55E-17	4.98E-14	-	1	238902410	238906981	-	3908	-	NA	-
gene:Zm00001d049244	951.6360931	248.4936281	4088.96366	17.06428708	12.43190155	10.9830407	1763.031127	13.49307644	7.029140174	2.84E-17	5.15E-14	-	4	22587096	22588289	-	1194	-	NA	-
gene:Zm00001d008001	0	0	0	187.7071579	722.1804627	302.9488727	0	404.2788311	-11.14786246	8.70E-17	1.47E-13	-	8	21268760	21273571	-	3592	-	NA	-
gene:Zm00001d008795	2288.510192	364.9750162	3872.080863	41.71270176	38.42587751	37.52538907	2175.18869	39.22132278	5.7932195	1.48E-16	2.35E-13	-	8	20660019	20662322	+	1850	-	NA	UDPGT
gene:Zm00001d052194	2928.027108	1829.189207	12397.98458	108.0738182	108.4965953	27.45760176	5718.400298	81.34267176	6.136625241	3.52E-16	5.25E-13	heat_shock_protein22	4	182772609	182773786	-	1044	-	NA	-
gene:Zm00001d012420	1133.887501	1336.516076	8864.24088	50.2448453	59.89916201	16.47456105	3778.214819	42.20618945	6.486432343	4.78E-16	6.73E-13	heat_shock_protein1	8	174179964	174183186	-	2504	-	NA	-
gene:Zm00001d037327	132.0504212	80.24273407	120.4904426	739.4524403	748.1744387	811.8297586	110.9278659	766.4855458	-2.791233251	5.25E-16	7.01E-13	C2C2-CO-like-transcription_factor_10	6	121369894	121371711	+	1676	-	NA	CCT
gene:Zm00001d047893	3519.525688	2711.859281	3170.344525	554.5893302	516.4890007	333.1522346	3133.909832	468.0768552	2.743429942	1.40E-15	1.78E-12	phosphoenolpyruvate_carboxykinase_homolog2	9	144511510	144516403	+	3862	-	NA	-
gene:Zm00001d038503	230.2697427	473.6909785	543.6528769	29.38849442	23.73363023	10.06778731	415.8711994	21.06330399	4.307588458	4.71E-15	5.70E-12	-	6	158787568	158795745	+	4084	-	NA	-
gene:Zm00001d043610	1116.426288	1199.326886	3378.55201	143.1504083	77.9819279	95.18635275	1898.101728	105.439563	4.169139982	8.30E-15	9.58E-12	-	3	205115325	205115651	-	327	-	NA	-
gene:Zm00001d027949	156.0595887	236.4140767	801.9843858	8.532143541	1.130172868	6.406773743	398.1526837	5.356363384	6.192689373	8.69E-15	9.58E-12	-	1	18159860	18161446	+	1587	-	NA	-
gene:Zm00001d002007	349.2242543	489.2218303	163.8670019	0	0	1.830506784	334.1043622	0.610168928	8.998949123	1.77E-14	1.88E-11	-	2	4299771	4305794	+	1844	-	NA	DEAD
gene:Zm00001d021135	925.444274	679.9061768	434.7295168	40.76468581	75.72158216	70.47451117	680.0266559	62.32025971	3.449307422	2.43E-14	2.47E-11	phosphatidylethanolamine-binding_protein24	7	143617763	143627668	-	2497	-	NA	-
gene:Zm00001d007488	97.12799574	224.3345253	208.2074848	0	0	0	176.5566686	0	9.917046911	3.49E-14	3.40E-11	-	2	232840625	232842492	+	698	-	NA	-
gene:Zm00001d048969	260.826865	255.3962289	629.4420721	25.59643062	20.34311163	9.152533919	381.8883886	18.36402539	4.381763198	4.72E-14	4.43E-11	PHD-transcription_factor_28	4	11098504	11103144	-	4251	-	NA	PHD
gene:Zm00001d013406	144.0550049	147.5430917	511.8434001	3.792063796	1.130172868	8.237280527	267.8138322	4.38650573	5.901413604	7.22E-14	6.54E-11	-	5	10497408	10501324	+	2039	-	NA	-
gene:Zm00001d008223	449.6262275	357.2095904	627.514225	0.948015949	19.21293876	1.830506784	478.1166809	7.330487163	6.066589186	9.08E-14	7.79E-11	-	8	1663801	1665182	+	918	-	NA	-
gene:Zm00001d002917	0	0	0	59.72500479	411.382924	275.491271	0	248.8663999	-10.44796125	9.21E-14	7.79E-11	-	2	26418750	26428989	+	1161	-	NA	-
gene:Zm00001d024744	0	0	0	125.1381053	114.1474597	149.1863029	0	129.4906226	-9.506516476	1.04E-13	8.53E-11	-	10	85872249	85877606	-	4697	-	NA	-
gene:Zm00001d028561	146.2376565	116.4813882	985.1298586	1.896031898	3.390518604	0	415.9496344	1.762183501	7.933311358	1.29E-13	1.02E-10	-	1	39214417	39214896	+	480	-	NA	-
gene:Zm00001d038519	252.0962586	207.9408485	206.2796377	0.948015949	0	0	222.1055816	0.316005316	9.285019996	1.35E-13	1.04E-10	-	6	159118513	159119912	-	1320	-	NA	-
gene:Zm00001d043048	239.0003491	289.9092328	147.4803017	0	0	1.830506784	225.4632945	0.610168928	8.42882129	1.68E-13	1.25E-10	-	3	187362499	187365040	-	819	-	NA	Peptidase_C1
gene:Zm00001d040029	91.67136677	453.8460013	221.7024144	4.740079745	0	5.491520351	255.7399275	3.410533365	6.188422278	1.82E-13	1.32E-10	-	3	23586531	23587232	-	702	-	NA	-
gene:Zm00001d038274	737.7362373	514.2437581	556.183883	2906.6169	3087.632276	2618.539954	602.7212928	2870.92971	-2.252420697	1.93E-13	1.36E-10	-	6	153040258	153042534	+	2187	-	NA	-
gene:Zm00001d043194	109.1325795	339.9530884	106.995513	0	0	0	185.3603936	0	9.987332148	2.05E-13	1.41E-10	-	3	191213811	191220468	-	1923	-	NA	-
gene:Zm00001d042922	192.0733399	308.0285598	1312.863862	18.01230303	7.911210076	3.661013567	604.3219207	9.861508892	5.936096009	2.45E-13	1.64E-10	-	3	184004259	184007974	-	2480	-	NA	HSP70
gene:Zm00001d014535	141.8723533	230.374301	78.0778068	0	0	0	150.1081537	0	9.682634349	3.79E-13	2.45E-10	-	5	52307416	52310579	+	235	-	NA	-
gene:Zm00001d007776	70.93617666	314.9311606	175.4340844	0	3.390518604	1.830506784	187.1004739	1.740341796	6.800262505	3.86E-13	2.45E-10	-	2	239399262	239421613	-	9635	-	NA	-
gene:Zm00001d028675	207.351901	274.378381	141.6967605	1121.502868	1565.289422	1555.930766	207.8090142	1414.241019	-2.765942007	5.50E-13	3.40E-10	-	1	42746694	42748113	+	1177	-	NA	-
gene:Zm00001d004366	1956.74715	926.6741547	5803.783638	83.42540352	45.20691472	6.406773743	2895.734981	45.01303066	6.008031447	5.95E-13	3.60E-10	-	2	106628660	106630400	-	1436	-	NA	UDPGT
gene:Zm00001d039566	236.8176975	83.69403446	1549.02513	5.688095694	6.781037208	6.406773743	623.1789539	6.291968882	6.63143614	6.84E-13	4.01E-10	heat_shock_protein18f	3	8104720	8105217	+	498	-	NA	-
gene:Zm00001d003999	112.4065569	114.755738	204.3517906	4.740079745	0	6.406773743	143.8380285	3.715617829	5.226407821	6.95E-13	4.01E-10	-	2	74637520	74638152	+	633	-	NA	-
gene:Zm00001d005842	0	0	0	98.5936587	125.4491884	98.84736632	0	107.6300711	-9.238479365	7.41E-13	4.18E-10	-	2	190584581	190597067	+	1926	-	NA	-
gene:Zm00001d053740	136.4157244	95.77358582	515.6990943	4.740079745	6.781037208	5.491520351	249.2961348	5.670879102	5.464103678	9.48E-13	5.23E-10	-	4	240122896	240124863	-	1968	-	NA	-
gene:Zm00001d014682	8.730606359	4.314125487	2.891770622	79.63333972	132.2302256	139.1185156	5.312167489	116.9940269	-4.48455459	1.52E-12	8.18E-10	-	5	58760829	58761221	-	393	-	NA	Auxin_inducible
gene:Zm00001d044768	13.09590954	18.11932705	11.56708249	120.3980255	148.0526457	151.0168097	14.26077302	139.8224936	-3.286316132	1.55E-12	8.18E-10	-	9	1932258	1935084	+	2637	-	NA	-
gene:Zm00001d001004	182.2514077	207.9408485	98.32020115	15.16825518	10.17155581	10.9830407	162.8374858	12.10761723	3.74558414	2.16E-12	1.12E-09	-	2	199004602	199007190	+	2589	-	NA	-
gene:Zm00001d035642	177.8861046	190.6843465	136.8771428	0.948015949	0	0	168.4825313	0.316005316	8.886860685	2.34E-12	1.19E-09	-	6	38113593	38114574	+	456	-	NA	-
gene:Zm00001d006714	678.8046444	1205.366661	1048.748812	190.5512058	131.1000527	139.1185156	977.6400393	153.5899247	2.669839284	2.74E-12	1.37E-09	-	2	215023176	215029253	-	1037	-	NA	-
gene:Zm00001d029803	3.273977384	1.725650195	5.783541244	105.2297703	74.59140929	99.76261971	3.594389608	93.19459978	-4.710929651	3.05E-12	1.49E-09	-	1	87586799	87591619	-	3009	-	NA	-
gene:Zm00001d008844	43.65303179	208.8036736	201.46002	0	0	0	151.3055751	0	9.694427221	3.37E-12	1.61E-09	-	8	22463844	22465698	+	533	-	NA	-
gene:Zm00001d004348	4569.381103	12184.81603	7346.061304	942.3278534	343.5725519	733.1179669	8033.419478	673.006124	3.577015423	5.39E-12	2.53E-09	-	2	105686148	105688384	+	1410	-	NA	-
gene:Zm00001d013713	65.47954769	79.37990897	75.18603617	314.7412951	391.0398123	438.4063747	73.34849761	381.3958274	-2.376885981	6.08E-12	2.80E-09	-	5	18274806	18283480	-	1383	-	NA	-
gene:Zm00001d006948	291.3839872	37.10147919	1231.894285	0.948015949	1.130172868	0	520.1265838	0.692729606	9.601091511	7.16E-12	3.25E-09	-	2	220001132	220004557	+	3322	-	NA	-
gene:Zm00001d021965	14.18723533	8.628250975	1.927847081	125.1381053	276.8923527	172.0676377	8.247777796	191.3660319	-4.548526186	8.03E-12	3.58E-09	-	7	167218706	167220496	+	1315	-	NA	-
gene:Zm00001d049590	125.5024664	182.9189207	142.660684	1.896031898	13.56207442	7.322027135	150.3606904	7.593377817	4.333793253	9.25E-12	4.05E-09	-	4	36538317	36549677	-	2113	-	NA	-
gene:Zm00001d025752	75.30147984	22.43345253	57.83541244	510.0325806	461.1105302	740.439994	51.85678161	570.5277016	-3.465389869	1.02E-11	4.38E-09	-	10	128391683	128395889	-	1354	-	NA	-
gene:Zm00001d013874	176.7947788	141.503316	43.37655933	1.896031898	2.260345736	1.830506784	120.558218	1.995628139	5.924039534	1.37E-11	5.80E-09	-	5	23541889	23543271	+	1383	-	NA	B_lectin
gene:Zm00001d048686	0	16.39367685	10.60315895	264.4964498	272.3716612	268.1692438	8.998945267	268.3457849	-4.872585744	1.40E-11	5.80E-09	-	4	3251055	3252592	-	849	-	NA	-
gene:Zm00001d006387	153.8769371	270.9270806	140.7328369	21.80436683	11.30172868	8.237280527	188.5122849	13.78112535	3.772332418	1.91E-11	7.80E-09	-	2	206364249	206367453	+	1919	-	NA	-
gene:Zm00001d050062	137.5070501	65.57470741	71.33034201	0	0	0	91.47069986	0	8.965660292	1.98E-11	7.86E-09	-	4	63286057	63292020	-	3293	-	NA	-
gene:Zm00001d043260	86.21473779	121.6583387	57.83541244	0	0	0	88.56949633	0	8.921625024	1.98E-11	7.86E-09	-	3	193682008	193682734	-	216	-	NA	-
gene:Zm00001d006651	320.8497837	176.0163199	234.2334204	1334.806456	1888.518863	1189.829409	243.6998413	1471.051576	-2.594721995	2.17E-11	8.46E-09	alpha_tubulin5	2	213473849	213477743	+	2246	-	NA	Tubulin_C
gene:Zm00001d013781	2242.674508	1310.631323	2299.921568	8687.618157	11285.90626	13899.03801	1951.0758	11290.85414	-2.532940656	2.32E-11	8.92E-09	-	5	19950789	19952787	-	1443	-	NA	-
gene:Zm00001d038806	165.8815208	190.6843465	1262.739838	13.27222329	5.65086434	17.38981445	539.7685686	12.10430069	5.470539219	2.89E-11	1.10E-08	heat-shock_protein_101	6	164808309	164812048	+	3240	-	NA	AAA
gene:Zm00001d011079	491.0966077	511.6552828	566.7870419	30.33651037	79.11210076	81.45755188	523.1796441	63.63538767	3.041101435	2.99E-11	1.12E-08	-	8	138332949	138333170	+	222	-	NA	-
gene:Zm00001d031813	224.8131137	172.5650195	613.0553719	22.75238278	21.47328449	8.237280527	336.8111684	17.48764927	4.272463428	3.25E-11	1.20E-08	-	1	202632511	202634549	-	1591	-	NA	-
gene:Zm00001d002358	1021.480944	900.7894018	1208.76012	3586.344335	4016.634373	4111.318236	1043.676822	3904.765648	-1.903639892	3.47E-11	1.26E-08	necrotic4	2	10781211	10785395	-	1837	-	NA	-
gene:Zm00001d033237	0	2.588475292	0	62.56905264	137.8810899	158.3388368	0.862825097	119.5963264	-6.989403331	3.86E-11	1.38E-08	-	1	255361226	255391452	-	2271	-	NA	Pkinase
gene:Zm00001d001841	68.75352507	204.4895481	422.1985108	5.688095694	0	0	231.8138613	1.896031898	6.901246147	4.00E-11	1.41E-08	-	2	1703673	1708071	+	884	-	NA	-
gene:Zm00001d006526	61.11424451	59.53493173	190.8568611	0	0	0	103.8353458	0	9.150345422	4.39E-11	1.51E-08	-	2	210505757	210507076	-	1320	-	NA	-
gene:Zm00001d042437	1930.555331	2095.802162	2551.505612	576.393697	618.2045588	586.6774242	2192.621035	593.75856	1.884855011	4.41E-11	1.51E-08	-	3	167218169	167222359	+	2564	-	NA	-
gene:Zm00001d041148	190.9820141	174.2906697	69.40249493	0.948015949	1.130172868	0	144.8917262	0.692729606	7.768704334	4.68E-11	1.58E-08	-	3	100335184	100337063	+	1194	-	NA	-
gene:Zm00001d002346	0	0	0	61.62103669	101.7155581	64.06773743	0	75.80144408	-8.731887838	4.85E-11	1.62E-08	cinnamyl_alcohol_dehydrogenase1	2	10649171	10653316	-	3763	-	NA	ADH_N
gene:Zm00001d014987	135.3243986	53.49515604	69.40249493	0	0	0	86.07401651	0	8.877700854	5.65E-11	1.86E-08	-	5	71221086	71222436	-	811	-	NA	-
gene:Zm00001d045760	605.6858161	740.3039336	325.8061568	36.97262201	5.65086434	2.745760176	557.2653022	15.12308218	5.198049145	6.67E-11	2.17E-08	-	9	37436400	37451534	-	12110	-	NA	-
gene:Zm00001d006882	221.5391364	162.2111183	189.8929375	34.12857417	33.90518604	29.28810854	191.2143974	32.44062292	2.559765924	6.85E-11	2.17E-08	-	2	218478425	218478715	+	291	-	NA	-
gene:Zm00001d025507	102.5846247	233.8256014	93.50058345	0	0	0.915253392	143.3036032	0.305084464	8.654458383	6.85E-11	2.17E-08	-	10	120795646	120808976	-	6621	-	NA	-
gene:Zm00001d000677	89.48871518	226.9230006	35.66517101	0	0	0	117.3589623	0	9.327925419	7.42E-11	2.33E-08	-	3	193684218	193684455	+	238	-	NA	-
gene:Zm00001d012982	275.0141003	36.23865409	187.0011669	0	1.130172868	1.830506784	166.0846404	0.986893217	7.391787612	8.62E-11	2.67E-08	-	5	2772181	2774600	-	1669	-	NA	Epimerase
gene:Zm00001d027947	275.0141003	174.2906697	1223.218973	21.80436683	5.65086434	1.830506784	557.5079144	9.761912651	5.831916491	9.36E-11	2.86E-08	-	1	18132684	18134270	-	1587	-	NA	-
gene:Zm00001d031666	923.2616224	2988.826138	2167.864043	237.9520032	257.6794139	236.1353751	2026.650601	243.9222641	3.054913632	1.04E-10	3.15E-08	-	1	198113791	198116973	-	1423	-	NA	-
gene:Zm00001d007718	304.4798968	80.24273407	296.8884505	7.584127592	0	0	227.2036938	2.528042531	6.460811269	1.06E-10	3.15E-08	benzoxazinone_synthesis13	2	238143557	238145188	-	1542	-	NA	2OG-FeII_Oxy
gene:Zm00001d014239	10.91325795	18.98215214	11.56708249	114.7099298	114.1474597	172.9828911	13.82083086	133.9467602	-3.26722179	1.09E-10	3.23E-08	-	5	37682388	37690146	+	1888	-	NA	Myosin_head
gene:Zm00001d039642	121.1371632	159.622643	213.991026	23.70039873	21.47328449	18.30506784	164.9169441	21.15958369	2.963979017	1.11E-10	3.23E-08	-	3	9977323	9980023	-	1925	-	NA	UDPGT
gene:Zm00001d007462	116.77186	166.5252438	206.2796377	22.75238278	21.47328449	20.13557462	163.1922472	21.4537473	2.928441397	1.15E-10	3.31E-08	-	2	232247283	232255516	+	1685	-	NA	Aminotran_1_2
gene:Zm00001d038665	170.246824	38.82712939	611.1275248	4.740079745	0	0.915253392	273.4004927	1.885111046	7.146270499	1.27E-10	3.61E-08	-	6	162205876	162207609	-	1734	-	NA	-
gene:Zm00001d001529	97.12799574	94.91076072	40.48478871	0	0	0	77.50784839	0	8.728186167	1.32E-10	3.71E-08	-	5	28050201	28050461	+	261	-	NA	-
gene:Zm00001d023495	114.5892085	100.9505364	65.54680077	7.584127592	7.911210076	4.576266959	93.69551521	6.690534876	3.816798234	1.49E-10	4.15E-08	-	10	7347502	7354331	+	2031	-	NA	Na_Ca_ex
gene:Zm00001d007792	43.65303179	69.0260078	112.7790543	0	0	0	75.15269795	0	8.68467973	1.77E-10	4.87E-08	-	2	239794663	239796426	-	1167	-	NA	Actin
gene:Zm00001d019692	7.639280564	13.80520156	1.927847081	116.6059617	149.1828186	130.881235	7.790776402	132.2233385	-4.070206365	1.78E-10	4.87E-08	-	7	51184119	51189112	-	1933	-	NA	-
gene:Zm00001d035053	34.92242543	26.74757802	28.91770622	192.4472377	148.0526457	192.2032123	30.19590323	177.5676986	-2.560662307	1.86E-10	5.03E-08	MADS-transcription_factor_45	6	3271721	3274263	+	1117	-	NA	SRF-TF
gene:Zm00001d033300	336.1283448	343.4043888	1257.920221	57.82897289	40.68622325	33.8643755	645.8176514	44.12652388	3.871193491	1.89E-10	5.05E-08	GRMZM2G043191	1	258063193	258065454	-	1350	-	NA	Exo_endo_phos
gene:Zm00001d017389	0	0	0	49.29682935	67.81037208	72.30501796	0	63.13740646	-8.469467314	2.11E-10	5.58E-08	-	5	194200726	194201613	-	606	-	NA	-
gene:Zm00001d006779	18.55253851	6.90260078	21.2063179	103.3337384	357.1346263	309.3556465	15.55381906	256.6080037	-4.051603867	2.43E-10	6.35E-08	-	2	216462633	216467303	-	4631	-	NA	-
gene:Zm00001d024962	0	0	0	71.10119618	125.4491884	36.61013567	0	77.7201734	-8.767452437	2.60E-10	6.74E-08	-	10	96956014	96967539	+	1713	-	NA	Pkinase
gene:Zm00001d043327	213.8998558	239.002552	80.00565388	15.16825518	3.390518604	9.152533919	177.6360206	9.237102569	4.250191109	2.79E-10	7.16E-08	-	3	196589524	196606761	-	5471	-	NA	Peptidase_S8
gene:Zm00001d013098	5872.424102	8991.500341	7921.523657	1648.599735	1384.461763	740.439994	7595.149367	1257.833831	2.594259351	3.00E-10	7.62E-08	aldehyde_oxidase2	5	4694181	4700885	+	6705	-	NA	Fer2
gene:Zm00001d026018	2493.679441	2134.629291	2190.034284	734.7123605	583.1691999	669.0502295	2272.781006	662.3105966	1.778534437	3.20E-10	8.03E-08	calcium_dependent_protein_kinase4	10	136174872	136179753	+	3135	-	NA	Pkinase
gene:Zm00001d005658	206.2605752	93.18511053	100.2480482	729.0242648	889.4460472	982.9821429	133.2312447	867.1508183	-2.704992022	3.47E-10	8.64E-08	trehalose-6-phosphate_phosphatase2	2	182513911	182516018	+	1391	-	NA	-
gene:Zm00001d004342	3917.859603	6941.427909	4845.643639	978.3524594	508.5777906	1032.405826	5234.977051	839.778692	2.639793423	3.59E-10	8.85E-08	-	2	105058417	105061020	-	1408	-	NA	-
gene:Zm00001d023396	74.21015405	70.75165799	74.22211263	287.2488326	285.9337356	318.5081804	73.06130822	297.2302495	-2.025041959	3.88E-10	9.47E-08	-	10	4674375	4678089	-	1223	-	NA	-
gene:Zm00001d006116	266.2834939	169.9765442	120.4904426	8.532143541	20.34311163	21.05082801	185.5834936	16.64202773	3.481876672	3.96E-10	9.54E-08	phosphatidylethanolamine-binding_protein18	2	199001851	199007982	-	1316	-	NA	-
gene:Zm00001d007101	0	0	0	61.62103669	41.81639612	86.94907223	0	63.46216834	-8.478783171	3.98E-10	9.54E-08	-	2	222281458	222297412	-	936	-	NA	Pkinase
gene:Zm00001d012801	51.29231236	49.18103056	94.46450699	0	0	0	64.9792833	0	8.474040272	4.09E-10	9.70E-08	-	5	241989	254837	-	6032	-	NA	-
gene:ENSRNA049997555	5.456628974	0	8.675311866	91.95754706	167.2655845	140.9490223	4.710646947	133.390718	-4.847596824	4.22E-10	9.92E-08	zma-MIR167i	9	113476123	113476252	+	130	-	NA	-
gene:Zm00001d013639	17.46121272	17.25650195	26.98985914	111.865882	211.3423263	186.7116919	20.56919127	169.9733001	-3.04574748	4.42E-10	1.03E-07	-	5	15998846	16001615	+	975	-	NA	-
gene:Zm00001d038651	53.47496395	73.34013329	73.25818909	1653.339815	423.8148255	464.9487231	66.69109544	847.3677879	-3.666612891	5.04E-10	1.16E-07	-	6	161809629	161813487	+	2532	-	NA	-
gene:Zm00001d045203	0	0	0	42.66071771	66.68019922	65.89824421	0	58.41305371	-8.35692923	5.36E-10	1.22E-07	Aux/IAA-transcription_factor_41	9	15993040	15994740	+	1348	-	NA	-
gene:Zm00001d006065	124.4111406	69.8888329	130.129678	463.5797991	708.6183883	744.1010076	108.1432172	638.7663983	-2.564191237	5.38E-10	1.22E-07	bHLH-transcription_factor_121	2	197131272	197133841	-	1878	-	NA	HLH
gene:Zm00001d042948	1479.837778	1637.642035	1734.09845	342.2337576	133.3603984	111.6609138	1617.192754	195.7516899	3.045803436	5.60E-10	1.26E-07	-	3	184682796	184686562	+	2025	-	NA	-
gene:Zm00001d046343	356.8635349	327.873537	293.0327564	1078.84215	2516.894977	2864.743117	325.9232761	2153.493415	-2.724162308	6.78E-10	1.51E-07	-	9	81848013	81848882	+	870	-	NA	-
gene:Zm00001d002481	45.83568338	70.75165799	54.94364182	0	0	0	57.1769944	0	8.290778953	7.04E-10	1.55E-07	-	2	13628848	13633113	+	3721	-	NA	Pkinase
gene:Zm00001d007487	76.39280564	156.1713426	81.93350096	0	2.260345736	0	104.8325497	0.753448579	7.284362555	7.14E-10	1.56E-07	-	2	232827656	232828330	+	519	-	NA	-
gene:Zm00001d042209	171.3381498	313.2055104	262.1872031	14.22023924	1.130172868	0	248.9102877	5.116804035	5.590451023	7.92E-10	1.72E-07	-	3	156115760	156116865	+	978	-	NA	-
gene:Zm00001d014291	4690.518266	4362.443693	3662.909455	1317.742169	929.0020975	807.2534916	4238.623805	1017.999253	2.057790946	9.09E-10	1.94E-07	-	5	39715418	39722456	+	2379	-	NA	SpoIIE
gene:Zm00001d044156	3092.817303	1902.52934	5811.495027	587.7698884	354.8742806	278.2370311	3602.280556	406.9604	3.145847124	9.11E-10	1.94E-07	-	3	220678000	220680745	-	1766	-	NA	p450
gene:Zm00001d045092	30.55712226	94.91076072	456.8997583	0.948015949	2.260345736	0	194.1225471	1.069453895	7.573405406	9.36E-10	1.98E-07	-	9	12257338	12258660	-	1323	-	NA	-
gene:Zm00001d024961	0	2.588475292	0	127.0341372	132.2302256	43.01690942	0.862825097	100.7604241	-6.74727121	9.44E-10	1.98E-07	-	10	96948264	96950890	-	2352	-	NA	Pkinase
gene:Zm00001d048558	76.39280564	112.1672627	222.6663379	11.37619139	10.17155581	10.9830407	137.0754687	10.84359597	3.658980178	9.64E-10	2.01E-07	glutathione_transferase25	9	158667068	158667751	-	684	-	NA	-
gene:Zm00001d047358	381.9640282	190.6843465	292.0688328	1678.936246	1234.148772	1402.168196	288.2390692	1438.417738	-2.320410428	1.27E-09	2.63E-07	-	9	127484762	127486235	+	1214	-	NA	-
gene:Zm00001d014328	189.8906883	176.0163199	375.9301809	39.81666986	20.34311163	19.22032123	247.279063	26.46003424	3.221601744	1.43E-09	2.92E-07	-	5	41100171	41101676	-	1506	-	NA	-
gene:Zm00001d013313	57.84026713	69.8888329	231.3416498	4.740079745	0	0.915253392	119.6902499	1.885111046	5.948783348	1.70E-09	3.45E-07	-	5	8353604	8353870	-	267	-	NA	-
gene:Zm00001d032850	3.273977384	0	4.819617703	154.5265997	109.6267682	44.8474162	2.697865029	103.0002614	-5.28733792	2.19E-09	4.40E-07	phosphate_transporter_protein2	1	240236142	240237767	+	1626	-	NA	Sugar_tr
gene:Zm00001d010411	110.2239053	31.06170351	43.37655933	429.4512249	585.4295457	696.5078312	61.55405604	570.4628673	-3.217674197	2.41E-09	4.81E-07	Aux/IAA-transcription_factor_38	8	113492914	113496509	-	1338	-	NA	-
gene:Zm00001d047859	123.3198148	216.5690995	8.675311866	0	0	0	116.1880754	0	9.312821705	2.84E-09	5.63E-07	male_sterile45	9	143633531	143636108	+	1640	-	NA	-
gene:Zm00001d038857	347.0416028	347.7185143	764.3913678	84.37341947	38.42587751	57.66096369	486.3838283	60.15342022	3.012772033	2.88E-09	5.67E-07	-	6	165907842	165913299	-	2146	-	NA	-
gene:Zm00001d048665	18.55253851	32.7873537	24.09808852	139.3583445	152.5733372	155.5930766	25.14599358	149.1749194	-2.560479507	3.36E-09	6.56E-07	-	4	2984218	2989686	+	2985	-	NA	NB-ARC
gene:Zm00001d020961	120.0458374	893.0239759	650.64839	48.3488134	19.21293876	13.72880088	554.5727344	27.09685101	4.353998099	4.78E-09	9.26E-07	-	7	137989627	137992577	-	1731	-	NA	Epimerase
gene:Zm00001d023393	211.7172042	10.35390117	85.78919512	0	0	0	102.6201002	0	9.131850698	4.84E-09	9.31E-07	npi285a(cac)	10	4656986	4661017	+	4032	-	NA	NB-ARC
gene:Zm00001d024575	0	0	0	22.75238278	111.8871139	53.99995012	0	62.87981561	-8.461625033	4.98E-09	9.49E-07	-	10	78839665	78843440	-	829	-	NA	-
gene:Zm00001d024978	0	0	0	32.23254227	59.89916201	48.50842977	0	46.88004468	-8.038849182	5.60E-09	1.06E-06	-	10	97752747	97758817	+	2670	-	NA	NB-ARC
gene:Zm00001d022794	58.93159292	96.63641092	76.14995971	1.896031898	0	0	77.23932118	0.632010633	6.880399391	5.98E-09	1.12E-06	-	1	117567865	117568369	+	505	-	NA	-
gene:Zm00001d053960	337.2196706	3803.33303	1534.566277	66.36111643	145.7923	85.11856544	1891.706326	99.09066062	4.256042506	6.78E-09	1.27E-06	-	4	244300872	244304783	+	1932	-	NA	Aconitase
gene:Zm00001d034148	28.37447067	71.61448309	49.16010057	0	0	0	49.71635144	0	8.090022061	7.21E-09	1.34E-06	-	1	285033162	285036599	-	683	-	NA	-
gene:Zm00001d025023	112.4065569	100.9505364	107.9594366	329.9095503	750.4347844	801.7619713	107.1055099	627.3687686	-2.550509341	7.70E-09	1.42E-06	-	10	100055458	100060317	-	2394	-	NA	2OG-FeII_Oxy
gene:Zm00001d016873	45.83568338	31.06170351	43.37655933	158.3186635	228.2949193	259.0167099	40.09131541	215.2100976	-2.427901273	8.16E-09	1.49E-06	bHLH-transcription_factor_152	5	178968180	178971530	-	1818	-	NA	HLH
gene:Zm00001d024595	0	0	0	41.71270176	40.68622325	43.93216281	0	42.11036261	-7.885613261	8.43E-09	1.53E-06	-	10	79813506	79821012	+	2547	-	NA	-
gene:Zm00001d000214	1.091325795	0	0	48.3488134	61.02933488	121.7287011	0.363775265	77.03561647	-7.796013965	8.47E-09	1.53E-06	-	B73V4_ctg129	173140	174744	-	1605	-	NA	-
gene:Zm00001d046181	151.6942855	114.755738	50.12402412	5.688095694	0	0	105.5246825	1.896031898	5.763239025	9.70E-09	1.73E-06	-	9	69840893	69846099	+	876	-	NA	-
gene:Zm00001d002238	24.00916749	27.61040312	14.45885311	89.11349921	307.4070201	408.2030128	22.02614124	268.2411774	-3.605119707	9.82E-09	1.74E-06	-	2	8598935	8599837	-	903	-	NA	-
gene:Zm00001d009084	14688.15387	5510.863898	23717.33872	1588.874731	380.8682565	206.8472666	14638.7855	725.5300846	4.334504268	1.07E-08	1.88E-06	-	8	35522370	35523774	+	1291	-	NA	Methyltransf_11
gene:Zm00001d046530	2051.692494	1452.134639	1628.06686	4908.826584	6723.398392	7386.094872	1710.631331	6339.43995	-1.889966233	1.09E-08	1.90E-06	-	9	94210411	94211858	+	1352	-	NA	-
gene:Zm00001d028987	849.0514684	981.8949609	1691.685814	254.0682743	145.7923	91.52533919	1174.210748	163.7953045	2.841678717	1.10E-08	1.90E-06	-	1	53748822	53754082	-	4614	-	NA	-
gene:Zm00001d015054	70.93617666	484.0448797	39.52086517	4.740079745	0	3.661013567	198.1673072	2.800364438	6.114547476	1.10E-08	1.90E-06	terpene_synthase3	5	73448283	73451482	+	2102	-	NA	-
gene:Zm00001d043341	60.02291872	109.5787874	17.35062373	0	0	0	62.31744328	0	8.414747175	1.13E-08	1.93E-06	-	3	197032557	197034669	-	1576	-	NA	-
gene:Zm00001d006470	1500.572968	1137.203478	1101.764607	377.3103477	213.6026721	300.2031125	1246.513684	297.0387108	2.068169394	1.24E-08	2.11E-06	-	2	209230535	209236917	+	2955	-	NA	Peptidase_M24
gene:Zm00001d029696	294.6579646	255.3962289	467.5029172	69.20516428	57.63881627	31.11861532	339.1857036	52.65419863	2.689038001	1.26E-08	2.13E-06	glutathione_transferase34	1	82924832	82926012	-	1048	-	NA	GST_C
gene:Zm00001d018340	202.9865978	141.503316	229.4138027	36.97262201	24.8638031	12.81354749	191.3012388	24.8833242	2.943585998	1.36E-08	2.28E-06	-	5	218861910	218865592	+	2082	-	NA	Aa_trans
gene:Zm00001d047993	888.339197	430.5497236	2815.620662	144.0984243	45.20691472	45.76266959	1378.169861	78.35600286	4.135544017	1.42E-08	2.38E-06	-	9	147425381	147428673	+	2372	-	NA	-
gene:Zm00001d044457	7.639280564	7.765425877	6.747464785	57.82897289	132.2302256	67.728751	7.384057075	85.92931648	-3.537773784	1.51E-08	2.50E-06	-	3	228664058	228666721	-	2589	-	NA	-
gene:Zm00001d002199	28.37447067	128.5609395	83.86134804	0.948015949	2.260345736	0	80.26558608	1.069453895	6.311916776	1.55E-08	2.56E-06	-	2	8127537	8131717	+	2849	-	NA	Pkinase
gene:Zm00001d028140	0	0	2.891770622	52.1408772	66.68019922	63.15248404	0.963923541	60.65785348	-5.97303982	1.56E-08	2.56E-06	-	1	23975834	23981932	+	4843	-	NA	-
gene:Zm00001d013536	134.2330728	24.15910273	53.01579474	538.4730591	922.2210603	809.0839984	70.46932341	756.5927059	-3.428935768	1.61E-08	2.62E-06	-	5	13856319	13859702	+	1354	-	NA	-
gene:Zm00001d048416	798.8504818	142.3661411	2410.772775	73.94524403	23.73363023	24.71184158	1117.329799	40.79690528	4.7739974	1.68E-08	2.71E-06	-	9	155900011	155902009	+	1561	-	NA	FAD_binding_3
gene:Zm00001d014178	424.5257342	679.9061768	455.9358347	1847.683085	1813.927453	2386.980846	520.1225819	2016.197128	-1.954204526	1.76E-08	2.82E-06	-	5	35060782	35071638	-	8147	-	NA	-
gene:Zm00001d043096	142.9636791	36.23865409	54.94364182	0.948015949	0	2.745760176	78.04865835	1.231258708	5.917063351	1.91E-08	3.04E-06	-	3	189146000	189147501	+	905	-	NA	-
gene:Zm00001d000294	4513.723487	541.8541612	6896.872934	335.597646	137.8810899	110.7456604	3984.150194	194.7414654	4.354383445	1.92E-08	3.04E-06	-	B73V4_ctg73	52548	56015	-	1867	-	NA	Cys_Met_Meta_PP
gene:Zm00001d020134	2551.519708	2880.973	3197.334384	960.3401564	964.0374565	701.9993516	2876.609031	875.4589881	1.71649426	2.11E-08	3.32E-06	-	7	94949585	94962130	-	5755	-	NA	-
gene:Zm00001d039241	151.6942855	43.14125487	57.83541244	4.740079745	4.520691472	3.661013567	84.22365093	4.307261595	4.289533772	2.15E-08	3.37E-06	-	3	393259	395283	+	1352	-	NA	C4dic_mal_tran
gene:Zm00001d053212	283.7447067	290.7720579	750.8964382	70.15318023	20.34311163	25.62709497	441.8044009	38.70779561	3.509624527	2.21E-08	3.43E-06	-	4	220417152	220419734	+	1467	-	NA	-
gene:Zm00001d012417	12.00458374	6.90260078	8.675311866	54.98492504	245.2475124	104.3388867	9.194165463	134.857108	-3.881172923	2.29E-08	3.54E-06	-	8	174164451	174165731	+	1281	-	NA	-
gene:Zm00001d044701	290.2926614	222.6088752	166.7587725	53.08889315	37.29570465	29.28810854	226.5534364	39.89090211	2.504910153	2.34E-08	3.60E-06	-	3	235255541	235259219	+	2574	-	NA	Abhydrolase_3
gene:Zm00001d017189	175.703453	162.2111183	200.4960965	46.4527815	30.51466744	24.71184158	179.4702226	33.89309684	2.403677257	2.59E-08	3.96E-06	-	5	188331294	188361493	+	2548	-	NA	-
gene:Zm00001d035553	61.11424451	47.45538036	258.3315089	0.948015949	5.65086434	0	122.3003779	2.199626763	5.867136646	2.81E-08	4.27E-06	-	6	32910876	32913020	+	2145	-	NA	ABC2_membrane
gene:Zm00001d031568	17.46121272	24.15910273	20.24239435	80.58135567	203.4311163	242.5421488	20.62090327	175.5182069	-3.085707872	2.93E-08	4.42E-06	-	1	194606659	194607393	+	735	-	NA	-
gene:Zm00001d003193	102.5846247	32.7873537	46.26832995	418.0750335	369.5665279	423.7623204	60.54676946	403.8012939	-2.74348844	3.08E-08	4.62E-06	-	2	35243617	35247317	+	1688	-	NA	-
gene:Zm00001d038585	281.5620551	31.92452861	282.4295974	9.48015949	10.17155581	10.06778731	198.638727	9.906500871	4.325191879	3.11E-08	4.64E-06	AP2-EREBP-transcription_factor_196	6	160539493	160540155	-	663	-	NA	AP2
gene:Zm00001d002094	2.18265159	0.862825097	3.855694163	47.40079745	42.94656899	72.30501796	2.300390283	54.21746147	-4.579145285	3.19E-08	4.73E-06	-	2	5872428	5873039	+	612	-	NA	-
gene:Zm00001d002159	13.09590954	7.765425877	25.06201206	90.06151516	161.6147201	207.76252	15.30778249	153.1462517	-3.326203735	3.35E-08	4.94E-06	-	2	6889076	6889357	+	282	-	NA	-
gene:Zm00001d024821	130.9590954	393.4482445	272.790362	30.33651037	45.20691472	21.05082801	265.7325673	32.19808437	3.05133204	3.38E-08	4.96E-06	sucrose-phosphatase2	10	89613645	89616637	+	2755	-	NA	-
gene:Zm00001d023781	2285.236214	1757.574724	1473.839094	7040.914454	5340.066802	7921.518107	1838.883344	6767.499787	-1.879941198	3.42E-08	4.99E-06	-	10	19951902	19954382	-	1854	-	NA	PUF
gene:Zm00001d006417	396.1512635	295.9490084	343.1567805	101.4377065	51.98795193	64.98299082	345.0856841	72.8028831	2.241942641	3.60E-08	5.21E-06	-	2	207291140	207302436	-	2538	-	NA	-
gene:Zm00001d008548	27.28314487	335.6389629	654.5040841	6.636111643	18.08276589	4.576266959	339.142064	9.765048164	5.130941652	4.05E-08	5.83E-06	wound_induced_protein1	8	12671727	12672398	-	582	-	NA	-
gene:Zm00001d044442	1626.075434	1946.53342	7643.913678	436.0873366	161.6147201	81.45755188	3738.840844	226.3865362	4.045566609	4.42E-08	6.34E-06	-	3	228214808	228222699	-	6994	-	NA	-
gene:Zm00001d029356	104.7672763	393.4482445	762.4635207	40.76468581	10.17155581	7.322027135	420.2263471	19.41942292	4.432579121	4.55E-08	6.49E-06	benzoxazinone_synthesis11	1	67228813	67231314	-	2502	-	NA	-
gene:Zm00001d032498	0	0	0	28.44047847	22.60345736	97.93211293	0	49.65868292	-8.125344684	4.58E-08	6.49E-06	-	1	228418762	228431630	+	645	-	NA	-
gene:Zm00001d039052	775.9326401	2087.173911	653.5401606	192.4472377	150.3129915	157.4235834	1172.215571	166.7279375	2.813694426	4.72E-08	6.62E-06	-	6	169320793	169327039	+	1974	-	NA	Sugar_tr
gene:Zm00001d031267	1154.622691	1178.619083	2666.212514	343.1817736	284.8035628	318.5081804	1666.484763	315.4978389	2.40092931	4.72E-08	6.62E-06	-	1	184397570	184400001	+	1820	-	NA	NPD
gene:Zm00001d016902	4233.252758	3895.655315	4426.336899	1570.862428	1479.396284	1155.049781	4185.081657	1401.769497	1.578079425	5.12E-08	7.14E-06	-	5	179645061	179649671	-	2522	-	NA	DHBP_synthase
gene:Zm00001d004230	62.20557031	222.6088752	27.95378268	2.844047847	0	0	104.256076	0.948015949	6.741017954	5.52E-08	7.66E-06	Homeobox-transcription_factor_96	2	94054835	94067869	+	9879	-	NA	START
gene:Zm00001d021905	5.456628974	0	3.855694163	38.86865391	110.7569411	95.18635275	3.104107712	81.60398258	-4.760847215	5.74E-08	7.92E-06	-	7	165738140	165738580	+	441	-	NA	-
gene:Zm00001d008841	16.36988692	50.04385565	389.4251104	0	1.130172868	0.915253392	151.9462843	0.681808753	7.832928887	5.84E-08	8.01E-06	heat_shock_protein18c	8	22307488	22307982	-	495	-	NA	-
gene:Zm00001d019450	46.92700918	17.25650195	26.98985914	172.5389027	174.0466217	275.491271	30.39112342	207.3589318	-2.779789017	5.90E-08	8.05E-06	-	7	34347110	34350538	-	2937	-	NA	Peptidase_S8
gene:Zm00001d046127	46.92700918	19.84497724	52.0518712	0	0	0	39.60795254	0	7.758000629	6.67E-08	9.04E-06	-	9	65021435	65026154	-	1944	-	NA	-
gene:Zm00001d016401	444.1695985	121.6583387	2811.764968	57.82897289	29.38449457	10.9830407	1125.864302	32.73216939	5.104236515	6.86E-08	9.26E-06	-	5	161021739	161022522	+	234	-	NA	-
gene:Zm00001d027175	61.11424451	105.2646619	28.91770622	0.948015949	0	0	65.09887087	0.316005316	7.51612342	7.05E-08	9.46E-06	-	9	125142466	125144036	-	1571	-	NA	-
gene:Zm00001d012593	2.18265159	2.588475292	0	29.38849442	80.24227363	63.15248404	1.590375627	57.59441736	-5.16938221	7.57E-08	1.01E-05	-	8	177011476	177014797	-	1800	-	NA	-
gene:Zm00001d041103	0	0	0	34.12857417	16.95259302	89.6948324	0	46.9253332	-8.043954349	7.63E-08	1.01E-05	-	3	97446205	97447461	+	797	-	NA	-
gene:Zm00001d044906	2352.898414	2855.088248	15292.64697	720.4921213	291.5846	178.4744114	6833.544545	396.8503776	4.105878515	8.25E-08	1.09E-05	12-oxo-phytodienoic_acid_reductase2	9	6893412	6895013	+	1508	-	NA	Oxidored_FMN
gene:Zm00001d014451	46.92700918	16.39367685	22.17024144	104.2817544	465.6312216	428.3385874	28.49697582	332.7505211	-3.551641135	8.43E-08	1.11E-05	-	5	47928633	47933975	+	3691	-	NA	-
gene:Zm00001d014499	188.7993625	352.0326398	211.0992554	53.08889315	46.33708759	24.71184158	250.6437526	41.37927411	2.601780996	8.78E-08	1.15E-05	-	5	50438959	50448486	+	3660	-	NA	C2
gene:Zm00001d044159	1585.69638	1726.51302	1163.455714	505.2925008	440.7674185	367.9318635	1491.888371	437.997261	1.768265903	9.23E-08	1.20E-05	cytochrome_P450_11	3	220748190	220754600	+	5580	-	NA	p450
gene:Zm00001d036761	479.0920239	205.3523732	531.1218709	54.98492504	29.38449457	6.406773743	405.188756	30.25873112	3.743809033	9.70E-08	1.26E-05	-	6	99961346	99963647	-	1598	-	NA	-
gene:Zm00001d046475	27.28314487	40.55277958	32.77340038	0	0	0	33.53644161	0	7.521157675	1.04E-07	1.34E-05	-	9	91605338	91606080	-	437	-	NA	-
gene:Zm00001d026293	345.950277	394.3110696	371.1105632	122.2940574	100.5853853	122.6439545	370.4573032	115.1744657	1.684381427	1.06E-07	1.36E-05	-	10	143077541	143089471	+	3557	-	NA	Aminotran_3
gene:Zm00001d007233	58.93159292	72.47730819	117.598672	12.32420734	4.520691472	6.406773743	83.00252436	7.750557518	3.409657851	1.07E-07	1.36E-05	-	2	225334575	225336580	+	1444	-	NA	-
gene:Zm00001d046483	1695.920285	2537.568612	2195.817826	684.4675152	734.6123642	596.7452115	2143.102241	671.941697	1.673639289	1.11E-07	1.40E-05	-	9	91945846	91949117	-	1605	-	NA	adh_short
gene:Zm00001d023444	0	0	0	24.64841468	32.77501317	43.01690942	0	33.48011242	-7.554902318	1.13E-07	1.42E-05	-	10	5652144	5653299	+	539	-	NA	-
gene:Zm00001d014717	815.2203687	1665.252438	1994.357806	233.2119235	159.3543744	38.44064246	1491.610204	143.6689801	3.37662226	1.14E-07	1.43E-05	-	5	60360935	60365129	+	2690	-	NA	-
gene:Zm00001d020976	108.0412537	43.14125487	261.2232795	1.896031898	10.17155581	8.237280527	137.468596	6.768289413	4.354368756	1.23E-07	1.53E-05	-	7	138349670	138351460	-	1490	-	NA	-
gene:Zm00001d049263	62.20557031	122.5211638	33.73732392	3.792063796	0	0	72.82135269	1.264021265	5.809201628	1.23E-07	1.53E-05	-	4	23503112	23503470	+	223	-	NA	-
gene:Zm00001d012015	276.1054261	264.8873049	630.4059956	79.63333972	47.46726046	63.15248404	390.4662422	63.41769474	2.620407371	1.28E-07	1.59E-05	SBP-transcription_factor_18	8	166514041	166517345	-	1387	-	NA	SBP
gene:Zm00001d002823	591.4985808	1398.639483	1603.004848	268.2885136	213.6026721	168.4066241	1197.714304	216.7659366	2.466347214	1.34E-07	1.65E-05	-	2	23768922	23777897	-	2141	-	NA	TPR_1
gene:Zm00001d047187	625.3296804	1311.494148	1089.233601	237.0039873	247.5078581	142.7795291	1008.68581	209.0971248	2.271256978	1.37E-07	1.68E-05	-	9	121320712	121323230	-	989	-	NA	-
gene:Zm00001d051713	91.67136677	154.4456924	62.65503014	7.584127592	0	0	102.9240298	2.528042531	5.319715468	1.39E-07	1.69E-05	-	4	167822108	167832752	-	869	-	NA	-
gene:Zm00001d015242	176.7947788	77.65425877	196.6404023	10.42817544	0	0	150.3631466	3.47605848	5.412932969	1.40E-07	1.69E-05	-	5	80675439	80680775	+	5147	-	NA	-
gene:Zm00001d046226	2260.135721	5808.538556	4090.891507	1035.233416	522.139865	562.880836	4053.188595	706.7513725	2.519685023	1.40E-07	1.69E-05	multidrug_resistance_protein_associated1	9	73244262	73250675	-	5598	-	NA	ABC_tran
gene:Zm00001d011433	197.5299689	179.4676203	169.6505432	640.8587816	523.2700379	510.7113927	182.2160441	558.2800707	-1.615911108	1.43E-07	1.72E-05	-	8	150402349	150407215	+	2924	-	NA	-
gene:Zm00001d015053	300.1145936	2037.130055	412.5592754	61.62103669	5.65086434	49.42368316	916.6013081	38.89852806	4.555051729	1.43E-07	1.72E-05	terpene_synthase2	5	73220250	73223078	-	1962	-	NA	-
gene:Zm00001d037289	120.0458374	88.87098504	104.1037424	315.689311	377.4777379	353.2878093	104.3401883	348.8182861	-1.742825569	1.52E-07	1.81E-05	outward_rectifying_potassium_channel1	6	119523282	119528893	-	2837	-	NA	Ion_trans
gene:Zm00001d014241	7.639280564	69.8888329	13.49492957	256.9123222	522.139865	692.8468176	30.34101434	490.6330016	-4.007111243	1.60E-07	1.90E-05	-	5	37751580	37770093	+	1747	-	NA	DIL
gene:Zm00001d013244	101.4932989	80.24273407	273.7542856	9.48015949	0	0	151.8301062	3.160053163	5.564267624	1.61E-07	1.90E-05	-	5	6946098	6946742	+	645	-	NA	UDPGT
gene:Zm00001d002984	39.28772861	40.55277958	62.65503014	0	2.260345736	0.915253392	47.49851278	1.058533043	5.562857222	1.72E-07	2.03E-05	-	2	28885268	28886767	+	702	-	NA	-
gene:Zm00001d046191	20.7351901	6.039775682	12.53100603	57.82897289	203.4311163	205.9320132	13.1019906	155.7307008	-3.58352136	1.76E-07	2.06E-05	-	9	71087363	71088028	-	666	-	NA	-
gene:Zm00001d029755	258.6442134	112.1672627	230.3777262	42.66071771	25.99397597	21.05082801	200.3964008	29.90184056	2.742463098	1.79E-07	2.09E-05	-	1	85773606	85775424	-	659	-	NA	-
gene:Zm00001d006629	393.9686119	301.125959	329.6618509	908.1992792	1017.155581	1100.134577	341.585474	1008.496479	-1.562574115	1.84E-07	2.13E-05	mTERF-domain_protein8	2	212952452	212953621	+	1170	-	NA	-
gene:Zm00001d018214	53.47496395	9.491076072	46.26832995	298.6250239	292.7147728	346.8810355	36.41145666	312.7402774	-3.109257468	1.93E-07	2.23E-05	-	5	216733539	216735329	-	1695	-	NA	Glyco_hydro_17
gene:Zm00001d002896	1839.97529	1082.845497	1726.387061	4470.843216	6483.801744	6100.163857	1549.73595	5684.936272	-1.875280906	1.95E-07	2.24E-05	TUB-transcription_factor_4	2	26117809	26122010	+	1927	-	NA	Tub
gene:Zm00001d006582	485.6399787	598.8006177	687.2774845	207.6154928	162.744893	149.1863029	590.5726936	173.1822296	1.769857283	1.98E-07	2.27E-05	-	2	211509696	211516137	-	3796	-	NA	ABC1
gene:Zm00001d028307	939.6315093	354.6211151	2265.220321	168.7468389	94.93452092	75.05077813	1186.490982	112.9107127	3.393141004	2.23E-07	2.54E-05	-	1	29957661	29960895	-	1560	-	NA	-
gene:Zm00001d046454	1413.266904	1610.894457	2646.934043	582.0817927	405.7320596	367.9318635	1890.365135	451.9152386	2.064463227	2.35E-07	2.66E-05	fatty_acyl_thioesterase1	9	90618251	90622738	-	2918	-	NA	-
gene:Zm00001d020638	151.6942855	339.0902633	699.8084905	47.40079745	7.911210076	5.491520351	396.8643464	20.26784263	4.287625875	2.36E-07	2.66E-05	-	7	125919246	125922710	+	2686	-	NA	-
gene:Zm00001d014422	411.4298247	356.3467653	543.6528769	118.5019936	93.80434805	47.59317638	437.1431556	86.63317269	2.336111268	2.68E-07	3.01E-05	JUMONJI-transcription_factor_16	5	45956643	45962835	+	5482	-	NA	JmjC
gene:Zm00001d022071	73.11882825	275.2412061	226.5220321	30.33651037	18.08276589	13.72880088	191.6273555	20.71602571	3.209780671	2.80E-07	3.13E-05	-	7	169428759	169434059	-	2259	-	NA	RRM_1
gene:Zm00001d027425	34.92242543	18.98215214	15.42277665	129.878185	132.2302256	123.5592079	23.10911808	128.5558728	-2.484940715	2.92E-07	3.25E-05	agamous-like6	1	4979131	4994850	-	1813	-	NA	SRF-TF
gene:Zm00001d008214	648.2475221	346.8556892	1259.848068	140.3063605	105.1060767	112.5761672	751.6504263	119.3295348	2.654580278	3.03E-07	3.36E-05	-	8	1454272	1456128	+	1529	-	NA	Rhomboid
gene:Zm00001d048788	0	15.53085175	0.963923541	142.2023924	155.9638558	182.135425	5.498258432	160.1005577	-4.827454197	3.13E-07	3.46E-05	-	4	5547919	5550554	-	786	-	NA	-
gene:Zm00001d008201	0	0	0	32.23254227	44.07674185	18.30506784	0	31.53811732	-7.465915223	3.16E-07	3.47E-05	Aux/IAA-transcription_factor_34	8	989823	991128	-	1089	-	NA	-
gene:Zm00001d026657	188.7993625	87.14533485	1235.749979	31.28452632	27.12414883	11.89829409	503.8982255	23.43565642	4.427973808	3.42E-07	3.74E-05	-	10	149524994	149525893	+	900	-	NA	CAF1
gene:Zm00001d018064	15.27856113	93.18511053	301.7080682	4.740079745	0	0	136.7239133	1.580026582	6.40681229	3.83E-07	4.17E-05	-	5	213687810	213690534	-	2283	-	NA	-
gene:Zm00001d039288	67.66219928	30.19887841	44.34048287	2.844047847	0	1.830506784	47.40052019	1.558184877	4.870224944	3.86E-07	4.17E-05	-	3	1064929	1066033	-	597	-	NA	Fer2
gene:Zm00001d017381	1224.467542	1717.884769	9643.091101	387.7385232	105.1060767	34.77962889	4195.147804	175.8747429	4.57588088	3.86E-07	4.17E-05	-	5	193892301	193893913	+	1156	-	NA	adh_short
gene:Zm00001d031733	122.228489	194.998472	28.91770622	6.636111643	0	0	115.3815558	2.212037214	5.678652337	4.32E-07	4.64E-05	-	1	200068571	200073558	-	941	-	NA	-
gene:Zm00001d010735	17.46121272	61.26058192	121.4543661	0	1.130172868	0.915253392	66.72538692	0.681808753	6.650672425	4.44E-07	4.76E-05	-	8	126341522	126344134	-	786	-	NA	-
gene:Zm00001d001240	38.19640282	68.1631827	10.60315895	0	0	0	38.98758149	0	7.73839484	4.51E-07	4.81E-05	-	7	146239341	146241951	-	2229	-	NA	-
gene:Zm00001d012794	44.74435759	30.19887841	95.42843053	0	0	2.745760176	56.79055551	0.915253392	5.875712788	4.55E-07	4.81E-05	-	5	32368	35621	-	3154	-	NA	-
gene:Zm00001d035865	831.5902557	144.0917913	1500.828953	67.30913238	67.81037208	13.72880088	825.5036666	49.61610178	4.058125584	4.55E-07	4.81E-05	-	6	57504894	57506321	+	1428	-	NA	-
gene:Zm00001d047437	25.10049328	18.98215214	57.83541244	168.7468389	272.3716612	221.4913208	33.97268596	220.8699403	-2.701088137	4.68E-07	4.93E-05	-	9	130019797	130021687	-	1654	-	NA	Pkinase_Tyr
gene:Zm00001d038452	289.2013356	686.8087776	355.6877865	93.85357896	21.47328449	44.8474162	443.8992999	53.39142655	3.052583818	4.72E-07	4.95E-05	-	6	157515617	157520471	+	3190	-	NA	-
gene:Zm00001d026290	564.2154359	1040.567068	709.4477259	183.9150941	228.2949193	219.660814	771.4100765	210.6236092	1.873580934	4.89E-07	5.10E-05	-	10	142970716	142981629	+	1447	-	NA	adh_short
gene:Zm00001d014683	60.02291872	40.55277958	37.59301809	4.740079745	2.260345736	1.830506784	46.05623879	2.943644088	3.958663203	5.11E-07	5.31E-05	-	5	58813575	58828125	-	9598	-	NA	-
gene:Zm00001d052375	7.639280564	25.88475292	17.35062373	150.7345359	249.7682038	77.79653831	16.95821907	159.4330927	-3.220857291	5.21E-07	5.40E-05	-	4	188485472	188486399	-	786	-	NA	-
gene:Zm00001d006860	1800.687561	1332.201951	1548.061206	623.7944945	491.6251976	462.2029629	1560.316906	525.8742183	1.568798118	5.90E-07	6.09E-05	ZIM-transcription_factor_12	2	218018545	218021082	+	1421	-	NA	Zim
gene:Zm00001d040905	161.5162176	137.1891905	149.4081488	357.4020128	853.2805154	1014.100758	149.3711856	741.5944288	-2.312044474	5.95E-07	6.11E-05	-	3	77818840	77819376	-	537	-	NA	-
gene:Zm00001d026387	41.4703802	129.4237646	57.83541244	0.948015949	7.911210076	4.576266959	76.24318576	4.478497662	4.116430922	6.04E-07	6.18E-05	-	10	144881978	144892402	+	6907	-	NA	DUF659
gene:Zm00001d007477	231.3610685	471.1025032	565.8231184	101.4377065	31.64484031	41.18640263	422.76223	58.08964983	2.86138077	6.33E-07	6.45E-05	-	2	232638292	232640352	-	2061	-	NA	Pkinase
gene:Zm00001d029476	116.77186	25.88475292	7.711388325	0	0	0	50.1226671	0	8.09718702	6.48E-07	6.57E-05	-	1	72405711	72410458	-	1173	-	NA	Ribosomal_S4e
gene:Zm00001d049231	0	5.176950585	0	36.97262201	55.37847054	140.033769	1.725650195	77.4616205	-5.411950549	6.73E-07	6.77E-05	-	4	21926866	21928847	+	828	-	NA	Pkinase
gene:Zm00001d034939	0	0	0.963923541	46.4527815	23.73363023	57.66096369	0.321307847	42.61579181	-6.943266614	6.73E-07	6.77E-05	-	1	306109761	306110705	+	729	-	NA	-
gene:Zm00001d034641	135.3243986	18.11932705	654.5040841	9.48015949	10.17155581	9.152533919	269.3159366	9.601416407	4.810656181	6.98E-07	7.00E-05	-	1	298696773	298697294	+	522	-	NA	-
gene:Zm00001d019102	46.92700918	35.375829	63.61895369	4.740079745	4.520691472	3.661013567	48.64059729	4.307261595	3.49974877	7.13E-07	7.12E-05	-	7	16749445	16754350	-	1922	-	NA	-
gene:Zm00001d030532	90.58004097	60.39775682	94.46450699	309.0531994	248.638031	340.4742618	81.81410159	299.3884974	-1.874382548	7.19E-07	7.15E-05	Homeobox-transcription_factor_127	1	142193026	142194949	+	1439	-	NA	Homeobox
gene:Zm00001d043291	312.1191773	257.1218791	37.59301809	6.636111643	20.34311163	14.64405427	202.2780248	13.87442585	3.871609341	7.59E-07	7.52E-05	-	3	194719439	194724473	+	2282	-	NA	Metallophos
gene:Zm00001d008205	70.93617666	27.61040312	38.55694163	229.4198597	231.685438	212.3387869	45.7011738	224.4813615	-2.303238576	7.86E-07	7.76E-05	phytochrome_interacting_factor3	8	1077606	1080652	+	2397	-	NA	HLH
gene:Zm00001d007312	44.74435759	356.3467653	8.675311866	0	2.260345736	2.745760176	136.5888116	1.668701971	6.363734307	7.89E-07	7.76E-05	-	2	227512023	227515789	+	1804	-	NA	-
gene:Zm00001d006677	24.00916749	0	34.70124746	355.5059809	397.8208496	485.9995511	19.57013832	413.1087938	-4.405225668	7.98E-07	7.82E-05	BZR-transcription_factor_7	2	214086849	214088343	-	1305	-	NA	-
gene:Zm00001d025241	56.74894133	46.59255526	34.70124746	197.1873174	150.3129915	266.338737	46.01424802	204.6130153	-2.155805024	8.15E-07	7.95E-05	-	10	110753799	110756285	+	1843	-	NA	-
gene:Zm00001d020708	139.6897017	105.2646619	64.58287723	553.6413142	341.3122062	446.6436552	103.1790803	447.1990585	-2.117570004	9.01E-07	8.76E-05	-	7	129524403	129529423	+	4261	-	NA	-
gene:Zm00001d043515	282.6533809	278.6925065	595.7047481	88.16548326	90.41382944	63.15248404	385.6835452	80.57726558	2.260130148	9.06E-07	8.77E-05	Aux/IAA-transcription_factor_12	3	202396755	202399107	-	1496	-	NA	-
gene:Zm00001d016866	2124.811323	2377.945969	2057.012836	916.7314227	883.7951828	873.1517358	2186.590042	891.2261138	1.294864552	9.73E-07	9.39E-05	-	5	178641592	178646428	-	1919	-	NA	Radical_SAM
gene:Zm00001d012392	38.19640282	50.90668075	27.95378268	0.948015949	0	0	39.01895542	0.316005316	6.777448015	9.91E-07	9.49E-05	-	8	173435429	173447107	+	1227	-	NA	Pkinase
gene:Zm00001d007285	16.36988692	59.53493173	20.24239435	0	0	0	32.049071	0	7.457533909	9.91E-07	9.49E-05	-	2	226813483	226814994	+	1292	-	NA	ADH_zinc_N
gene:Zm00001d009773	649.3388479	591.8980169	481.9617703	1464.684641	1507.650606	1749.049232	574.399545	1573.794826	-1.454351024	1.04E-06	9.85E-05	-	8	80504928	80508153	+	1435	-	NA	CCT
gene:Zm00001d014244	109.1325795	81.10555916	489.6731587	25.59643062	10.17155581	16.47456105	226.6370991	17.4141825	3.697476848	1.04E-06	9.85E-05	-	5	37833152	37834955	+	1412	-	NA	Lipase_GDSL
gene:Zm00001d024752	16.36988692	60.39775682	137.8410663	1.896031898	4.520691472	0.915253392	71.53623669	2.443992254	4.909909973	1.04E-06	9.85E-05	-	10	86136391	86137413	-	1023	-	NA	-
gene:Zm00001d014947	879.6085906	36.23865409	2100.389395	65.41310048	11.30172868	12.81354749	1005.412213	29.84279222	5.0722949	1.04E-06	9.85E-05	invertase2	5	69452584	69455758	+	2484	-	NA	-
gene:Zm00001d006331	130.9590954	107.8531372	168.6866196	36.97262201	19.21293876	25.62709497	135.8329507	27.27088525	2.310945842	1.07E-06	0.000100952	-	2	204901088	204902529	+	1442	-	NA	-
gene:Zm00001d030393	2.18265159	10.35390117	8.675311866	37.92063796	99.45521239	132.7117418	7.070621542	90.02919739	-3.651303497	1.08E-06	0.000101157	-	1	128962166	128962447	-	282	-	NA	-
gene:Zm00001d021168	964.7320026	36.23865409	2152.441266	69.20516428	24.8638031	19.22032123	1051.137308	37.7630962	4.797943038	1.11E-06	0.000103495	-	7	144743120	144744903	-	1668	-	NA	UDPGT
gene:Zm00001d000618	8.730606359	19.84497724	18.31454727	82.47738757	84.7629651	117.1524342	15.63004362	94.79759561	-2.590355351	1.15E-06	0.000106579	-	3	140011562	140012001	+	332	-	NA	-
gene:Zm00001d042933	74.21015405	44.00407997	457.8636818	9.48015949	6.781037208	0	192.0259719	5.4203989	5.154558503	1.17E-06	0.000108051	-	3	184473764	184474312	-	549	-	NA	-
gene:Zm00001d013210	293.5666388	132.0122399	444.3687523	54.98492504	13.56207442	11.89829409	289.9825437	26.81509785	3.431215064	1.22E-06	0.000112404	-	5	6604879	6605949	-	885	-	NA	-
gene:Zm00001d002592	294.6579646	89.73381014	694.9888728	45.50476555	29.38449457	32.03386872	359.7935492	35.64104295	3.334260264	1.31E-06	0.000120078	1-aminocyclopropane-1-carboxylate_synthase2	2	16311191	16314804	+	2032	-	NA	Aminotran_1_2
gene:Zm00001d048680	603.5031645	1184.658859	1471.911247	6001.888973	4622.40703	3540.20012	1086.69109	4721.498708	-2.119091524	1.39E-06	0.000127298	-	4	3197914	3204309	-	4037	-	NA	-
gene:Zm00001d052953	42.561706	88.00815994	88.68096574	11.37619139	10.17155581	7.322027135	73.08361056	9.623258112	2.93008263	1.41E-06	0.000128344	-	4	206116499	206121004	-	3321	-	NA	PUF
gene:Zm00001d014243	31.64844805	10.35390117	18.31454727	106.1777863	125.4491884	125.3897147	20.10563216	119.0055631	-2.578221456	1.42E-06	0.000129314	-	5	37785958	37788118	+	1407	-	NA	Pkinase_Tyr
gene:Zm00001d044526	1188.453791	1636.77921	1329.250563	324.2214546	89.28365658	319.4234338	1384.827854	244.309515	2.50173046	1.46E-06	0.000132305	-	3	230886380	230888010	+	1062	-	NA	zf-RanBP
gene:Zm00001d048202	78.57545723	6.90260078	30.8455533	0	0	0	38.7745371	0	7.72607256	1.52E-06	0.000136969	-	9	152376010	152377305	+	1135	-	NA	-
gene:Zm00001d038998	589.3159292	427.0984233	650.64839	192.4472377	142.4017814	97.01685954	555.6875808	143.9552929	1.948662623	1.58E-06	0.000142187	-	6	168506016	168510678	+	3399	-	NA	-
gene:Zm00001d021977	65.47954769	32.7873537	651.6123135	9.48015949	13.56207442	3.661013567	249.9597383	8.901082492	4.819525269	1.59E-06	0.000142187	-	7	167433982	167434281	-	300	-	NA	-
gene:Zm00001d036513	38.19640282	35.375829	137.8410663	6.636111643	1.130172868	1.830506784	70.47109938	3.198930432	4.442394728	1.63E-06	0.000145396	-	6	90960081	90962234	+	1416	-	NA	Amino_oxidase
gene:Zm00001d016933	100.4019731	45.72973017	29.88162976	234.1599394	478.0631232	383.4911712	58.67111102	365.2380779	-2.641872088	1.63E-06	0.000145396	-	5	180363906	180366525	+	2467	-	NA	-
gene:Zm00001d027900	140.7810275	41.41560468	396.1725752	18.01230303	15.82242015	10.06778731	192.7897358	14.63417017	3.72109407	1.73E-06	0.000153237	ZIM-transcription_factor_27	1	17147073	17148511	+	1194	-	NA	Zim
gene:Zm00001d017991	45.83568338	120.7955136	321.9504626	18.01230303	4.520691472	1.830506784	162.8605532	8.121167096	4.321305651	1.81E-06	0.000159687	-	5	211551863	211552138	-	276	-	NA	-
gene:Zm00001d010005	22.91784169	18.98215214	35.66517101	94.8015949	140.1414356	148.2710495	25.85505495	127.7380267	-2.30573178	1.81E-06	0.000159687	-	8	94793182	94793514	-	333	-	NA	-
gene:Zm00001d050096	0	0	0	27.49246252	24.8638031	19.22032123	0	23.85886228	-7.065252212	1.82E-06	0.000159811	-	4	65397409	65400059	+	786	-	NA	-
gene:Zm00001d007056	149.5116339	194.1356469	79.04173034	12.32420734	0	0	140.8963371	4.108069113	5.082420808	1.85E-06	0.000162241	-	2	220976693	220979812	+	2838	-	NA	NB-ARC
gene:Zm00001d024665	29.46579646	176.879145	180.2537021	5.688095694	10.17155581	0	128.8662145	5.286550502	4.632245743	1.86E-06	0.000162544	-	10	82671602	82673149	-	1548	-	NA	-
gene:Zm00001d048408	33.83109964	140.6404909	1.927847081	0	0	0	58.79981254	0	8.331124859	1.92E-06	0.000166644	-	9	155704857	155709375	+	1856	-	NA	-
gene:Zm00001d013495	14.18723533	18.11932705	59.76325952	0	0	0	30.68994063	0	7.392330838	1.92E-06	0.000166644	-	5	12771079	12774680	-	1979	-	NA	-
gene:Zm00001d005654	160.4248918	31.06170351	886.8096574	25.59643062	5.65086434	10.06778731	359.4320843	13.77169409	4.701294588	1.96E-06	0.000168882	-	2	182185442	182186092	+	651	-	NA	-
gene:Zm00001d000202	20.7351901	59.53493173	47.23225349	2.844047847	2.260345736	0.915253392	42.50079177	2.006548992	4.419373155	1.98E-06	0.000170184	-	B73V4_ctg6	202989	206597	-	1030	-	NA	ESCRT-III
gene:Zm00001d030304	17.46121272	31.92452861	227.4859556	3.792063796	1.130172868	0	92.29056564	1.640745555	5.809760789	2.00E-06	0.000171332	-	1	121172256	121174236	+	1415	-	NA	-
gene:Zm00001d037717	397.2425893	533.2259102	749.9325147	162.1107273	106.2362496	169.3218775	560.1336714	145.8896181	1.939663589	2.04E-06	0.000174167	-	6	135053658	135064649	-	3085	-	NA	-
gene:Zm00001d046915	1212.462958	829.1749187	1020.79503	2466.737499	2961.052914	3492.606943	1020.810969	2973.465786	-1.542708404	2.06E-06	0.000175729	-	9	110360513	110367095	+	5593	-	NA	AMP-binding
gene:Zm00001d050716	1483.111755	868.0020481	1253.100603	445.5674961	322.0992674	293.7963388	1201.404802	353.8210341	1.763249898	2.12E-06	0.000179788	-	4	118325912	118331112	-	4965	-	NA	-
gene:Zm00001d009365	779.2066175	729.9500325	1005.372253	316.637327	192.1293876	149.1863029	838.176301	219.3176725	1.933994589	2.13E-06	0.000180019	sugars_will_eventually_be_exported_transporter2	8	60083986	60086634	-	2160	-	NA	-
gene:Zm00001d010845	45.83568338	50.90668075	11.56708249	97.64564275	654.3700906	511.6266461	36.10314887	421.2141265	-3.543836267	2.15E-06	0.000181077	-	8	130064540	130065590	-	870	-	NA	-
gene:Zm00001d034810	12.00458374	137.1891905	35.66517101	282.5087528	892.8365658	1762.778033	61.61964842	979.3744504	-3.987033373	2.16E-06	0.000181077	-	1	302660432	302670600	+	4280	-	NA	-
gene:Zm00001d011839	816.3116945	438.3151495	1240.569597	215.1996204	179.697486	142.7795291	831.732147	179.2255452	2.214292252	2.17E-06	0.000181918	-	8	162488291	162493316	-	1309	-	NA	-
gene:Zm00001d031581	938.5401836	1238.154015	1282.982233	404.8028102	391.0398123	466.7792299	1153.225477	420.8739508	1.454133379	2.18E-06	0.000181918	-	1	195388615	195402490	+	6458	-	NA	-
gene:Zm00001d024406	380.8727024	636.7649219	530.1579474	182.9670782	145.7923	140.9490223	515.9318572	156.5694668	1.720658601	2.24E-06	0.000186237	-	10	69199906	69204296	+	1618	-	NA	-
gene:Zm00001d008733	5567.944205	4661.844002	7515.711847	2124.503742	1229.62808	864.9144553	5915.166685	1406.348759	2.07242936	2.30E-06	0.000190412	-	8	18170312	18176375	+	5084	-	NA	ABC_membrane
gene:Zm00001d051001	1538.769371	1122.535452	2521.623982	420.9190814	197.7802519	77.79653831	1727.642935	232.1652905	2.895516794	2.37E-06	0.000195889	glyceraldehyde-3-phosphate_dehydrogenase3	4	136187079	136190530	+	1741	-	NA	-
gene:Zm00001d031332	13309.80939	10305.58296	18875.55077	5182.803193	3459.459149	2859.251596	14163.64771	3833.83798	1.885314058	2.44E-06	0.000200606	-	1	186376331	186380883	-	2896	-	NA	-
gene:Zm00001d002540	1873.80639	2488.387581	2455.113258	949.9119809	649.8493991	562.880836	2272.435743	720.8807387	1.656402491	2.52E-06	0.000206919	calcium_dependent_protein_kinase5	2	14993653	14998930	-	2213	-	NA	Pkinase
gene:Zm00001d022092	1315.047583	454.7088264	3756.410038	229.4198597	216.9931907	190.3727055	1842.055482	212.2619186	3.117415255	2.54E-06	0.00020803	-	7	170115656	170116687	-	1032	-	NA	Sulfotransfer_1
gene:Zm00001d043045	4571.563755	4285.652259	5836.557039	1465.632657	2074.997386	1701.456055	4897.924351	1747.362033	1.487118883	2.55E-06	0.000208103	-	3	187256637	187257673	-	690	-	NA	-
gene:Zm00001d014250	169.1554982	182.9189207	555.2199594	38.86865391	45.20691472	9.152533919	302.4314594	31.07603418	3.287281922	2.58E-06	0.000210181	ZIM-transcription_factor_30	5	38073928	38074939	+	767	-	NA	Zim
gene:Zm00001d021535	20.7351901	15.53085175	8.675311866	109.9698501	63.28968061	102.5083799	14.98045124	91.92263686	-2.624513756	2.68E-06	0.000217368	-	7	155278714	155283440	+	4643	-	NA	Pkinase
gene:Zm00001d008215	109.1325795	93.18511053	99.28412469	371.622252	345.8328976	244.3726556	100.5339382	320.6092684	-1.67367875	2.70E-06	0.000217822	-	8	1460764	1465581	-	1273	-	NA	-
gene:Zm00001d007644	51.29231236	157.8969928	133.9853722	17.06428708	18.08276589	16.47456105	114.3915591	17.20720468	2.736047592	2.77E-06	0.000223067	-	2	236816516	236817445	+	654	-	NA	Epimerase
gene:Zm00001d007708	2.18265159	81.96838426	52.0518712	0	0	0	45.40096902	0	7.958682776	2.89E-06	0.00023223	-	2	237896411	237899603	-	1062	-	NA	Pkinase_Tyr
gene:Zm00001d006180	0	0	0	11.37619139	29.38449457	35.69488228	0	25.48518941	-7.160470161	2.92E-06	0.000233755	-	2	200830545	200833132	-	1449	-	NA	-
gene:Zm00001d007871	98.21932153	132.875065	154.2277665	29.38849442	5.65086434	7.322027135	128.4407177	14.12046197	3.17719093	2.95E-06	0.000235421	-	2	241395955	241407519	+	7059	-	NA	-
gene:Zm00001d041511	822.8596493	912.006128	765.3552913	348.8698692	313.0578845	338.643755	833.4070229	333.5238362	1.321058396	3.08E-06	0.000244751	-	3	125028657	125033309	-	2914	-	NA	-
gene:Zm00001d015226	12.00458374	63.84905721	39.52086517	176.3309665	322.0992674	340.4742618	38.45816871	279.6348319	-2.855246427	3.19E-06	0.000252717	G2-like-transcription_factor_18	5	80066943	80069666	-	1935	-	NA	Myb_DNA-binding
gene:Zm00001d015779	60.02291872	119.0698635	85.78919512	238.9000192	443.0277643	624.2028133	88.29399243	435.3768656	-2.299655131	3.20E-06	0.000253161	-	5	118773282	118856166	+	2193	-	NA	-
gene:Zm00001d044760	73.11882825	122.5211638	89.64488928	4.740079745	14.69224728	19.22032123	95.09496046	12.88421609	2.885983425	3.30E-06	0.000259887	-	9	1601296	1605346	-	2189	-	NA	-
gene:Zm00001d047548	65.47954769	21.57062744	267.9707443	7.584127592	1.130172868	0	118.3403065	2.90476682	5.337333906	3.39E-06	0.000265924	18_kda_heat_shock_protein18a	9	134965867	134966361	+	495	-	NA	-
gene:Zm00001d047661	85.123412	13.80520156	73.25818909	448.4115439	423.8148255	360.6098364	57.39560088	410.9454019	-2.844088247	3.43E-06	0.000268615	-	9	138406738	138409643	-	2443	-	NA	-
gene:Zm00001d025654	348.1329286	556.5221879	737.4015086	179.1750144	99.45521239	112.5761672	547.3522084	130.4021313	2.068829681	3.45E-06	0.000269543	-	10	125148713	125149748	-	772	-	NA	-
gene:Zm00001d014253	79.66678302	29.33605331	191.8207846	0.948015949	10.17155581	5.491520351	100.2745403	5.537030704	4.197818775	3.51E-06	0.000273083	ZIM-transcription_factor_10	5	38196209	38196691	+	483	-	NA	Zim
gene:Zm00001d013099	483.4573271	179.4676203	2215.096296	109.0218341	28.2543217	12.81354749	959.3404146	50.02990111	4.260307805	3.53E-06	0.000273083	-	5	4703800	4704819	+	1020	-	NA	Abhydrolase_3
gene:Zm00001d037731	6.547954769	26.74757802	24.09808852	69.20516428	176.3069674	327.6607143	19.1312071	191.0576153	-3.312396814	3.53E-06	0.000273083	-	6	135520819	135531374	+	9177	-	NA	-
gene:Zm00001d002707	2826.533809	860.2366222	5506.895188	428.503209	205.691462	38.44064246	3064.555206	224.2117711	3.772771023	3.57E-06	0.00027513	-	2	19851191	19852588	-	1398	-	NA	UDPGT
gene:Zm00001d039323	34.92242543	37.96430429	40.48478871	189.6031898	129.9698798	119.8981943	37.79050614	146.4904213	-1.954191895	3.59E-06	0.00027513	-	3	1839047	1842858	-	2091	-	NA	FMO-like
gene:Zm00001d043354	195.3473173	405.5277958	12.53100603	0	0	0	204.4687064	0	10.12788105	3.59E-06	0.00027513	-	3	197463158	197466335	-	2748	-	NA	-
gene:Zm00001d044726	1303.042999	414.1560468	1497.937182	229.4198597	201.1707705	191.2879589	1071.712076	207.292863	2.369923317	3.61E-06	0.00027513	-	9	482944	485826	-	2883	-	NA	-
gene:Zm00001d004344	527.1103589	519.4207087	612.0914483	226.5758118	176.3069674	213.2540403	552.874172	205.3789398	1.427760461	3.61E-06	0.00027513	-	2	105273286	105274644	+	1239	-	NA	-
gene:Zm00001d028171	301.2059194	549.6195871	353.7599394	120.3980255	74.59140929	40.27114924	401.528482	78.42019469	2.356890501	3.65E-06	0.000277368	-	1	25153513	25154838	+	1326	-	NA	C2
gene:Zm00001d034852	530.3843363	830.0377438	698.844567	1416.335828	4091.225782	4722.707502	686.4222157	3410.089704	-2.312428871	3.67E-06	0.00027781	-	1	303812821	303814256	-	1222	-	NA	-
gene:Zm00001d035684	209.5345526	25.88475292	91.57273636	0.948015949	3.390518604	10.9830407	108.9973473	5.107191752	4.401771369	3.85E-06	0.000290805	-	6	41090605	41090817	+	213	-	NA	-
gene:Zm00001d008820	673.3480154	692.8485533	1570.231448	243.6400989	256.549241	180.3049182	978.8093388	226.8314194	2.109865558	3.87E-06	0.00029106	-	8	21650403	21654524	-	2064	-	NA	2OG-FeII_Oxy
gene:Zm00001d054044	2786.154754	4287.377909	6366.714986	1146.151282	1398.023838	737.6942338	4480.08255	1093.956451	2.034194227	3.90E-06	0.000292821	catalase3	4	245523681	245525759	+	1875	-	NA	Catalase
gene:Zm00001d007163	0	0	0	22.75238278	11.30172868	41.18640263	0	25.08017136	-7.140826094	4.03E-06	0.000301954	-	2	223621321	223625177	-	1652	-	NA	-
gene:Zm00001d047242	78.57545723	119.9326886	112.7790543	23.70039873	25.99397597	13.72880088	103.7624	21.14105852	2.302580467	4.07E-06	0.000303961	-	9	123767136	123771340	+	2316	-	NA	Na_Ca_ex
gene:Zm00001d013610	39.28772861	112.1672627	369.1827161	18.96031898	12.43190155	10.06778731	173.5459025	13.82000261	3.650252505	4.17E-06	0.000310262	-	5	15325753	15326415	+	663	-	NA	Thaumatin
gene:Zm00001d031338	1693.737634	1798.127503	2111.956478	839.9421309	683.7545852	630.609587	1867.940538	718.102101	1.379171179	4.19E-06	0.000310625	-	1	186729080	186739316	+	4720	-	NA	Pkinase_Tyr
gene:Zm00001d015401	1815.966123	2375.357493	2269.076015	904.4072154	844.2391324	660.8129489	2153.466544	803.1530989	1.423142532	4.27E-06	0.00031607	-	5	88448697	88451738	-	1658	-	NA	-
gene:Zm00001d014013	68.75352507	97.49923602	42.41263579	235.1079554	284.8035628	328.5759677	69.55513229	282.8291619	-2.021729421	4.43E-06	0.000326862	ARF-transcription_factor_17	5	28634910	28639671	-	4535	-	NA	-
gene:Zm00001d038852	151.6942855	17.25650195	147.4803017	5.688095694	9.041382944	0.915253392	105.4770297	5.214910677	4.357121446	4.47E-06	0.00032856	reversion-to-ethylene_sensitivity1_like3	6	165889541	165893007	-	1511	-	NA	-
gene:Zm00001d038460	392.8772861	464.1999024	222.6663379	94.8015949	44.07674185	20.13557462	359.9145088	53.00463713	2.763219205	4.77E-06	0.000349485	-	6	157677507	157682181	-	4135	-	NA	-
gene:Zm00001d043994	185.5253851	40.55277958	495.4566999	28.44047847	11.30172868	5.491520351	240.5116215	15.07790917	3.994065761	4.96E-06	0.000362924	-	3	215948160	215950590	-	1075	-	NA	-
gene:Zm00001d043267	1498.390316	1670.429389	1938.45024	746.0885519	653.2399177	555.5588089	1702.423315	651.6290928	1.385581924	4.99E-06	0.000364054	-	3	193839098	193843223	+	1697	-	NA	Acyltransferase
gene:Zm00001d035624	6.547954769	7.765425877	7.711388325	34.12857417	39.55605038	303.8641261	7.341589657	125.8495835	-4.098745746	5.01E-06	0.00036411	-	6	37478852	37482504	+	3564	-	NA	-
gene:Zm00001d034795	1395.805692	864.5507477	1913.388228	452.2036077	252.0285496	172.0676377	1391.248223	292.0999316	2.251661014	5.15E-06	0.000373285	prohibitin4	1	302374919	302378019	-	1632	-	NA	-
gene:Zm00001d045043	1779.952371	2799.867441	2855.141528	965.0802361	601.2519658	481.4232841	2478.320447	682.585162	1.8602899	5.28E-06	0.000381764	-	9	10913773	10917850	-	1932	-	NA	ADH_N
gene:Zm00001d042961	58.93159292	168.250894	108.9233601	22.75238278	16.95259302	10.06778731	112.0352823	16.59092104	2.759184295	5.37E-06	0.000387425	respiratory_burst_oxidase1	3	184964596	184969233	-	2999	-	NA	FAD_binding_8
gene:Zm00001d025412	1306.316976	2145.846017	2445.474023	689.207595	324.3596131	257.1862031	1965.879006	423.5844704	2.214329642	5.48E-06	0.000394059	-	10	117864859	117874556	+	2520	-	NA	-
gene:Zm00001d004203	105.8586021	40.55277958	336.4093157	20.85635088	7.911210076	5.491520351	160.9402325	11.41969377	3.813819606	5.54E-06	0.000397011	-	2	91200390	91200728	+	339	-	NA	-
gene:Zm00001d003742	598.0465356	570.3273894	511.8434001	243.6400989	151.4431643	153.7625698	560.0724417	182.948611	1.613374932	5.61E-06	0.00040074	-	2	56993829	56999447	+	3507	-	NA	WD40
gene:Zm00001d003728	10.91325795	46.59255526	19.27847081	0	0	0	25.59476134	0	7.133522199	5.62E-06	0.00040074	-	2	56632216	56643296	-	8827	-	NA	-
gene:Zm00001d006855	120.0458374	139.7776658	91.57273636	28.44047847	33.90518604	25.62709497	117.1320799	29.32425316	2.00196132	5.67E-06	0.000402835	-	2	217965389	217972562	+	2992	-	NA	-
gene:Zm00001d026586	11644.44623	10878.49883	12210.98341	26376.64775	26234.70279	37367.96548	11577.97616	29993.10534	-1.373260097	5.78E-06	0.00040991	-	10	148397982	148402287	-	2616	-	NA	Amino_oxidase
gene:Zm00001d006591	68.75352507	14.66802666	256.4036618	4.740079745	5.65086434	0	113.2750712	3.463648029	5.051177237	5.82E-06	0.000411583	-	2	211745003	211746860	-	1064	-	NA	-
gene:Zm00001d002316	1409.992927	449.5318758	1878.686981	255.0162903	71.20089069	35.69488228	1246.070595	120.6373544	3.368045858	6.13E-06	0.000432105	argonaute2a	2	10157520	10164911	-	3383	-	NA	Piwi
gene:Zm00001d032667	9.821932153	22.43345253	7.711388325	77.73730782	65.55002635	213.2540403	13.32225767	118.8471248	-3.148886517	6.26E-06	0.000440059	-	1	233705669	233715985	-	6807	-	NA	tRNA-synt_2b
gene:Zm00001d053569	9.821932153	5.176950585	7.711388325	53.08889315	40.68622325	66.81349761	7.570090355	53.529538	-2.837174921	6.32E-06	0.000442173	-	4	234845163	234847523	+	2094	-	NA	-
gene:Zm00001d013459	20.7351901	44.86690507	27.95378268	0	1.130172868	0	31.18529262	0.376724289	6.455826477	6.33E-06	0.000442173	-	5	12107718	12111634	+	1199	-	NA	PhyH
gene:Zm00001d048417	938.5401836	134.6007152	1907.604687	130.826201	79.11210076	64.98299082	993.5818619	91.64043085	3.438294709	6.51E-06	0.000453806	-	9	155903728	155905521	+	1518	-	NA	FAD_binding_3
gene:Zm00001d029699	435.4389921	180.3304454	3356.381769	12.32420734	0	0.915253392	1324.050402	4.413153576	8.222238079	6.69E-06	0.000465182	glutathione_transferase42	1	83058555	83059659	+	986	-	NA	-
gene:Zm00001d006834	1196.093071	719.5961313	778.8502209	2302.73074	2842.384763	2732.031375	898.1798078	2625.715626	-1.547995536	6.73E-06	0.000466477	-	2	217589644	217595800	+	5989	-	NA	-
gene:Zm00001d033503	110.2239053	226.9230006	348.9403217	53.08889315	41.81639612	25.62709497	228.6957425	40.17746141	2.510599712	6.75E-06	0.000466477	-	1	264688457	264693791	+	4392	-	NA	-
gene:Zm00001d047542	42.561706	3.45130039	214.9549496	0.948015949	2.260345736	0	86.98931865	1.069453895	6.402107036	6.82E-06	0.000470484	-	9	134707072	134707554	+	483	-	NA	-
gene:Zm00001d006647	79.66678302	116.4813882	125.3100603	14.22023924	0	0.915253392	107.1527438	5.045164209	4.390864244	6.90E-06	0.00047423	-	2	213345740	213349165	+	3052	-	NA	-
gene:Zm00001d025508	22.91784169	2.588475292	99.28412469	0	0	0	41.59681389	0	7.830113661	7.17E-06	0.000491885	-	10	120809943	120810596	+	654	-	NA	-
gene:Zm00001d009118	8.730606359	4.314125487	33.73732392	128.9301691	120.9284969	194.0337191	15.59401859	147.9641283	-3.248060498	7.35E-06	0.000501865	-	8	37520293	37521579	-	951	-	NA	Usp
gene:Zm00001d028966	1062.951324	858.510972	1389.013822	446.515512	336.7915147	295.6268456	1103.492039	359.6446241	1.617267545	7.36E-06	0.000501865	-	1	53177235	53181012	+	3584	-	NA	-
gene:Zm00001d007072	1779.952371	843.8429453	2052.193218	429.4512249	369.5665279	458.5419493	1558.662845	419.1865674	1.894270098	7.46E-06	0.000507164	-	2	221453612	221455343	+	1261	-	NA	-
gene:Zm00001d017084	70.93617666	72.47730819	109.8872836	18.96031898	19.21293876	10.9830407	84.4335895	16.38543281	2.371045775	7.48E-06	0.000507164	NAC-transcription_factor_13	5	184855226	184858638	-	1975	-	NA	NAM
gene:Zm00001d007486	65.47954769	150.131567	685.3496374	37.92063796	15.82242015	8.237280527	300.3202507	20.66011288	3.860794587	7.53E-06	0.000509769	-	2	232825416	232826846	-	1431	-	NA	UDPGT
gene:Zm00001d045458	1.091325795	0	0	36.02460606	16.95259302	37.52538907	0.363775265	30.16752938	-6.445122676	7.62E-06	0.000513905	-	9	23018536	23019558	-	1023	-	NA	-
gene:Zm00001d052493	147.3289823	31.92452861	89.64488928	426.6071771	724.4408084	435.6606145	89.63280006	528.9028667	-2.563893652	7.85E-06	0.00052829	-	4	191343386	191345393	-	1772	-	NA	-
gene:Zm00001d024664	9.821932153	37.10147919	113.7429778	0.948015949	2.260345736	0	53.55546305	1.069453895	5.713275941	8.00E-06	0.000536952	-	10	82660544	82662094	+	1551	-	NA	-
gene:Zm00001d013782	7.639280564	8.628250975	12.53100603	144.0984243	89.28365658	30.20336193	9.599512523	87.86181425	-3.192003231	8.10E-06	0.000542262	-	5	20023452	20027129	+	3502	-	NA	Pkinase
gene:Zm00001d017420	78.57545723	129.4237646	283.393521	30.33651037	13.56207442	4.576266959	163.7975809	16.15828392	3.341570817	8.12E-06	0.000542377	Trihelix-transcription_factor_20	5	195392064	195395934	-	2874	-	NA	-
gene:Zm00001d016679	746.4668437	1954.298846	1273.342997	4159.893984	5152.458105	5816.435305	1324.702896	5042.929132	-1.928315695	8.16E-06	0.000543598	-	5	172379178	172386407	-	7147	-	NA	-
gene:Zm00001d013530	220.4478106	179.4676203	122.4182897	43.60873366	48.59743333	50.33893655	174.1112402	47.51503451	1.873003605	8.36E-06	0.000555148	-	5	13665338	13670915	-	2095	-	NA	-
gene:Zm00001d006152	0	0	0	25.59643062	14.69224728	20.13557462	0	20.14141751	-6.822989914	8.54E-06	0.000565484	-	2	199865890	199868263	+	684	-	NA	-
gene:Zm00001d014256	30.55712226	113.8929129	0.963923541	0	0	0	48.47131955	0	8.052459728	8.66E-06	0.000571956	-	5	38434379	38446001	-	5573	-	NA	-
gene:Zm00001d010670	103.6759505	235.5512516	293.0327564	46.4527815	42.94656899	45.76266959	210.7533195	45.05400669	2.226335428	8.78E-06	0.000578331	-	8	123786952	123790784	+	2089	-	NA	NAD_Gly3P_dh_C
gene:Zm00001d006757	20.7351901	16.39367685	22.17024144	0	0	0	19.76636946	0	6.756242742	9.38E-06	0.000616422	-	2	216050123	216061504	-	4239	-	NA	-
gene:Zm00001d026060	216.0825074	65.57470741	617.8749896	36.02460606	35.03535891	23.79658819	299.8440681	31.61885105	3.246215863	9.62E-06	0.0006307	1-aminocyclopropane-1-carboxylate_synthase7	10	137296427	137304511	+	3283	-	NA	Aminotran_1_2
gene:Zm00001d049060	710.4530924	371.877617	2664.284666	164.9547751	32.77501317	8.237280527	1248.871792	68.65568961	4.184374254	9.70E-06	0.000632878	-	4	14442996	14443265	-	270	-	NA	-
gene:Zm00001d053568	156.0595887	18.98215214	166.7587725	600.0940957	1324.562601	990.30417	113.9335044	971.6536224	-3.093717573	9.70E-06	0.000632878	-	4	234742154	234742759	-	606	-	NA	-
gene:Zm00001d051556	2036.413933	1074.217246	1255.992374	3373.040747	6514.316412	6314.333151	1455.541184	5400.563436	-1.891726507	9.83E-06	0.000639476	nine-cis-epoxycarotenoid_dioxygenase6	4	162737448	162739364	-	1917	-	NA	RPE65
gene:Zm00001d024285	0	0	0	16.11627113	19.21293876	22.8813348	0	19.4035149	-6.767782697	9.99E-06	0.000648028	bZIP-transcription_factor_32	10	61712124	61716615	-	642	-	NA	bZIP_1
gene:Zm00001d044146	746.4668437	452.9831762	1755.304768	225.6277959	51.98795193	43.93216281	984.9182625	107.1826369	3.199027573	1.01E-05	0.000652363	-	3	220480167	220482238	-	1745	-	NA	p450
gene:Zm00001d046134	31.64844805	9.491076072	75.18603617	0	0	0.915253392	38.77518677	0.305084464	6.766415101	1.02E-05	0.000659749	-	9	65715514	65719719	+	2012	-	NA	Glyco_hydro_17
gene:Zm00001d038453	703.9051377	819.6838426	306.5276859	159.2666794	113.0172868	45.76266959	610.0388887	106.0155453	2.525255073	1.03E-05	0.000662573	-	6	157518291	157524838	-	5947	-	NA	-
gene:Zm00001d034022	261.9181908	194.1356469	142.660684	508.1365487	1065.753015	693.762071	199.5715072	755.8838781	-1.921632718	1.03E-05	0.000663586	-	1	281348543	281351127	-	900	-	NA	Tubulin
gene:Zm00001d037342	1.091325795	0	0	28.44047847	29.38449457	22.8813348	0.363775265	26.90210261	-6.276316815	1.04E-05	0.000664103	-	6	122118736	122121645	-	1065	-	NA	-
gene:Zm00001d015737	534.7496395	289.9092328	188.929014	69.20516428	65.55002635	90.6100858	337.8626287	75.12175881	2.167321406	1.04E-05	0.000665785	-	5	114786885	114788112	-	1035	-	NA	zf-RanBP
gene:Zm00001d015806	328.4890642	243.3166775	121.4543661	647.4948932	1054.451286	1599.862929	231.0867026	1100.603036	-2.252369646	1.05E-05	0.000668747	-	5	121771405	121772568	+	735	-	NA	-
gene:Zm00001d034836	12.00458374	0	4.819617703	41.71270176	107.3664225	129.9659816	5.608067149	93.01503529	-4.082622934	1.08E-05	0.000687171	-	1	303454791	303456205	+	1335	-	NA	PBD
gene:Zm00001d044443	289.2013356	462.4742523	628.4781485	159.2666794	96.06469379	89.6948324	460.0512455	115.0087352	1.999772392	1.10E-05	0.000693284	-	3	228235045	228243424	-	5042	-	NA	ABC2_membrane
gene:Zm00001d023724	0	22.43345253	4.819617703	111.865882	93.80434805	344.1352753	9.084356746	183.2685018	-4.315635525	1.10E-05	0.000693284	-	10	17272676	17277089	-	3396	-	NA	-
gene:Zm00001d006885	106.9499279	98.36206111	101.2119718	260.704386	265.590624	394.4742119	102.1746536	306.923074	-1.587893832	1.10E-05	0.000693284	-	2	218537811	218543707	-	2473	-	NA	Pkinase
gene:Zm00001d042611	10.91325795	0	1.927847081	42.66071771	99.45521239	94.27109936	4.280368343	78.79567649	-4.246250231	1.10E-05	0.000693284	gibberellin_20-oxidase3	3	173559174	173562022	-	1522	-	NA	2OG-FeII_Oxy
gene:Zm00001d032318	28.37447067	0	25.06201206	141.2543764	232.8156108	797.1857043	17.81216091	390.4185639	-4.460528101	1.10E-05	0.000693284	-	1	222026472	222026744	-	273	-	NA	-
gene:Zm00001d046621	105.8586021	13.80520156	36.62909455	250.2762105	462.240703	566.5418496	52.09763273	426.3529211	-3.038144572	1.13E-05	0.000704861	glossy15	9	99138564	99141663	+	2107	-	NA	AP2
gene:Zm00001d029688	661.3434317	268.3386053	896.4488928	134.6182648	146.9224728	123.5592079	608.7103099	135.0333152	2.172504086	1.13E-05	0.000705494	-	1	82827141	82831219	-	2469	-	NA	p450
gene:Zm00001d035570	2630.095166	3346.898553	778.8502209	406.6988421	457.7200116	137.2880088	2251.94798	333.9022875	2.754132411	1.13E-05	0.000705518	-	6	34068043	34075550	+	5605	-	NA	Lipase_3
gene:Zm00001d000909	32.73977384	37.10147919	97.35627761	2.844047847	0	6.406773743	55.73251022	3.083607197	4.13584948	1.20E-05	0.000745919	-	2	121367572	121368253	-	682	-	NA	-
gene:Zm00001d024594	138.5983759	109.5787874	122.4182897	291.0408964	357.1346263	488.7453113	123.5318177	378.9736113	-1.618516922	1.20E-05	0.000745919	-	10	79726997	79731279	+	2574	-	NA	-
gene:Zm00001d017699	323.0324353	91.45946033	475.2143056	1792.69816	1435.319542	1684.066241	296.5687337	1637.361314	-2.465538334	1.22E-05	0.000755761	-	5	204537835	204540181	+	1427	-	NA	-
gene:Zm00001d011080	25274.01408	12484.21634	10992.58406	2297.99066	5527.675498	2257.014864	16250.27149	3360.893674	2.273624279	1.23E-05	0.000758079	subtilisin-chymotrypsin_inhibitor_homolog1	8	138416663	138416884	+	222	-	NA	-
gene:Zm00001d004243	1.091325795	65.57470741	50.12402412	0	0	0	38.93001911	0	7.736759456	1.24E-05	0.000761943	-	2	95493594	95497031	+	2180	-	NA	FKBP_C
gene:Zm00001d052253	678.8046444	616.0571196	1918.207846	252.1722424	226.0345736	119.8981943	1071.023203	199.3683368	2.42588936	1.25E-05	0.000767336	-	4	184810866	184812137	+	1272	-	NA	Kelch_1
gene:Zm00001d003657	583.8593002	189.8215214	2501.381588	121.3460415	61.02933488	9.152533919	1091.68747	63.84263676	4.096107495	1.26E-05	0.000769898	GRAS-transcription_factor_25	2	52665039	52666535	+	1497	-	NA	GRAS
gene:Zm00001d006390	99.31064733	127.6981144	39.52086517	11.37619139	10.17155581	0.915253392	88.84320898	7.487666864	3.580185911	1.26E-05	0.000770873	-	2	206473408	206475669	+	963	-	NA	-
gene:Zm00001d006210	24.00916749	38.82712939	27.95378268	1.896031898	1.130172868	0	30.26335985	1.008734922	4.92853049	1.26E-05	0.000770873	-	2	201905639	201911544	-	5587	-	NA	-
gene:Zm00001d008816	2247.039812	1490.961768	2590.062554	795.3853813	765.1270317	569.2876097	2109.354711	709.9333409	1.571101194	1.28E-05	0.000774744	-	8	21388425	21392149	-	2155	-	NA	PFK
gene:Zm00001d037644	62.20557031	12.07955136	7.711388325	145.9944562	377.4777379	296.542099	27.33217	273.3380977	-3.330607152	1.28E-05	0.000774744	-	6	132737331	132738086	-	756	-	NA	-
gene:Zm00001d021773	212.80853	286.4579324	203.3878671	493.9163095	906.3986402	949.1177674	234.2181098	783.144239	-1.740704155	1.30E-05	0.000787031	-	7	162780554	162780784	+	231	-	NA	-
gene:Zm00001d032742	56.74894133	61.26058192	0.963923541	0	0	0	39.6578156	0	7.761612853	1.31E-05	0.000789844	-	1	237017109	237019632	+	1235	-	NA	Asp
gene:Zm00001d009939	611.1424451	414.1560468	2015.564124	160.2146954	102.845731	17.38981445	1013.620872	93.48341361	3.439158456	1.32E-05	0.000797715	WRKY-transcription_factor_34	8	90768544	90769854	-	1001	-	NA	WRKY
gene:Zm00001d038625	13149.3845	10897.48098	11728.05772	5791.429433	4872.175234	4298.945182	11924.9744	4987.516616	1.25757782	1.34E-05	0.000804894	sulfite_reductase1	6	161162525	161167432	-	2507	-	NA	-
gene:Zm00001d012067	302.2972452	130.2865897	243.8726558	785.9052218	697.3166596	852.1009078	225.4854969	778.4409297	-1.789157745	1.35E-05	0.000809614	bHLH-transcription_factor_55	8	167566134	167569229	+	2537	-	NA	HLH
gene:Zm00001d006525	763.9280564	67.3003576	586.0655127	67.30913238	6.781037208	15.55930766	472.4313089	29.88315908	3.979180961	1.36E-05	0.000811966	-	2	210497851	210499212	-	1362	-	NA	-
gene:Zm00001d043121	126.5937922	134.6007152	202.4239435	38.86865391	15.82242015	5.491520351	154.5394837	20.06086481	2.944677952	1.36E-05	0.000812074	-	3	189739582	189740244	-	663	-	NA	Thaumatin
gene:Zm00001d006153	3140.835638	1299.414597	4940.108146	888.2909443	471.282086	404.5419992	3126.786127	588.0383431	2.410558998	1.38E-05	0.000819402	-	2	199939674	199944750	+	4914	-	NA	-
gene:Zm00001d006947	474.7267208	57.80928153	1702.288973	9.48015949	1.130172868	0	744.9416584	3.536777453	7.713472237	1.38E-05	0.000821537	-	2	219989864	219991904	-	1930	-	NA	p450
gene:Zm00001d007012	5761.108871	3349.487028	6840.001445	14653.48252	16909.64645	17323.9162	5316.865781	16295.68173	-1.615884543	1.40E-05	0.000827855	-	2	220171958	220174039	-	1240	-	NA	RRM_1
gene:Zm00001d004583	412.5211504	188.0958713	173.5062373	685.4155312	1347.166059	1371.049581	258.0410863	1134.543724	-2.137468371	1.44E-05	0.000852079	-	2	119616414	119616800	+	387	-	NA	-
gene:Zm00001d004380	911.2570387	721.3217815	1146.10509	105.2297703	167.2655845	342.3047686	926.22797	204.9333745	2.175443072	1.46E-05	0.000861621	-	2	107469703	107470980	-	1278	-	NA	-
gene:Zm00001d039231	18.55253851	97.49923602	1.927847081	0	0	0	39.32654054	0	7.751514614	1.47E-05	0.000867064	-	6	173932423	173936047	+	2826	-	NA	-
gene:Zm00001d034932	245.5483038	193.2728218	192.7847081	468.3198788	575.2579898	608.6435056	210.5352779	550.7404581	-1.388145888	1.48E-05	0.000871546	-	1	306072454	306079843	-	2092	-	NA	Rhodanese
gene:Zm00001d013945	2.18265159	4.314125487	13.49492957	35.07659011	356.0044534	34.77962889	6.663902216	141.9535575	-4.407228276	1.51E-05	0.000885396	-	5	25546118	25546714	-	597	-	NA	-
gene:Zm00001d015470	28.37447067	0	11.56708249	129.878185	271.2414883	224.237081	13.31385105	208.4522515	-3.982394816	1.53E-05	0.000895902	-	5	91982760	91983347	-	588	-	NA	-
gene:Zm00001d025361	31.64844805	144.0917913	73.25818909	11.37619139	11.30172868	5.491520351	82.99947614	9.389813473	3.152550772	1.62E-05	0.000944339	-	10	115668682	115669017	+	336	-	NA	-
gene:Zm00001d051483	0	0	0	11.37619139	23.73363023	21.9660814	0	19.02530101	-6.737844648	1.66E-05	0.000963984	-	4	160083460	160084250	+	711	-	NA	UQ_con
gene:Zm00001d029768	202.9865978	71.61448309	74.22211263	430.3992409	571.8674712	572.9486233	116.2743979	525.0717785	-2.177865895	1.68E-05	0.000973582	barley_mlo_defense_gene_homolog2	1	86261116	86266872	-	4064	-	NA	-
gene:Zm00001d017249	9.821932153	9.491076072	10.60315895	65.41310048	65.55002635	39.35589585	9.972055724	56.77300756	-2.508214064	1.70E-05	0.000986915	ammonium_transporter2	5	190317987	190319453	+	1467	-	NA	Ammonium_transp
gene:Zm00001d022155	44.74435759	100.9505364	54.94364182	13.27222329	10.17155581	8.237280527	66.87951194	10.56035321	2.665872499	1.72E-05	0.000995654	-	7	171391092	171396068	+	2472	-	NA	Pkinase
gene:Zm00001d013359	58.93159292	241.5910273	231.3416498	19.90833493	27.12414883	2.745760176	177.28809	16.59274798	3.426743305	1.82E-05	0.001051907	-	5	9534496	9536929	+	1055	-	NA	-
gene:Zm00001d013026	17.46121272	48.31820546	6.747464785	0	0	0	24.17562765	0	7.050347648	1.85E-05	0.001066798	-	5	3433739	3437031	+	2977	-	NA	-
gene:Zm00001d003048	559.8501327	694.5742035	1352.384728	293.8849442	174.0466217	142.7795291	868.9363546	203.570365	2.093578503	1.89E-05	0.001085762	-	2	30338613	30343062	-	3754	-	NA	-
gene:Zm00001d014764	161.5162176	348.5813394	134.9492957	914.8353908	658.8907821	1025.999052	215.0156176	866.5750751	-2.009744903	1.90E-05	0.001085762	-	5	62108780	62114128	-	5349	-	NA	-
gene:Zm00001d038843	838.1382104	88.87098504	1343.709416	83.42540352	93.80434805	58.57621708	756.9062037	78.60198955	3.267939242	1.90E-05	0.001085762	WRKY-transcription_factor_82	6	165655159	165656827	+	1381	-	NA	WRKY
gene:Zm00001d028693	772.6586627	388.2712939	672.8186314	182.0190622	109.6267682	40.27114924	611.2495293	110.6389932	2.46600828	1.91E-05	0.001088464	safener_induced1	1	43343008	43345059	-	1394	-	NA	-
gene:Zm00001d046535	62.20557031	54.35798114	50.12402412	150.7345359	183.0880046	161.084597	55.56252519	164.9690458	-1.570797564	1.92E-05	0.001092647	-	9	94503734	94505652	+	1400	-	NA	-
gene:Zm00001d028431	9.821932153	19.84497724	29.88162976	0	0	0	19.84951305	0	6.764976152	1.93E-05	0.001095602	-	1	34818314	34833657	+	1623	-	NA	-
gene:Zm00001d006343	53.47496395	34.5130039	16.38670019	1.896031898	0	0	34.79155601	0.632010633	5.733185271	1.93E-05	0.001095602	-	2	205076861	205080041	-	2131	-	NA	-
gene:Zm00001d001580	54.56628974	6.90260078	14.45885311	0	0	0	25.30924788	0	7.109531105	1.94E-05	0.001095832	-	5	76615310	76615596	+	287	-	NA	-
gene:Zm00001d006036	6158.35146	5083.765474	8133.586836	2781.478795	1530.254063	1302.405577	6458.567924	1871.379478	1.787054393	1.98E-05	0.001115761	-	2	195892796	195896295	-	3065	-	NA	HSP70
gene:Zm00001d048662	0	0	0	20.85635088	15.82242015	16.47456105	0	17.71777736	-6.63699381	2.00E-05	0.001122036	-	4	2961499	2962521	+	1023	-	NA	-
gene:Zm00001d007745	135.3243986	102.6761866	151.3359959	32.23254227	28.2543217	44.8474162	129.7788603	35.11142672	1.881266044	2.00E-05	0.001122036	-	2	238606921	238613493	-	2553	-	NA	Pkinase_Tyr
gene:Zm00001d044124	147.3289823	99.22488621	146.5163782	41.71270176	15.82242015	12.81354749	131.0234156	23.44955647	2.478149261	2.03E-05	0.00113881	polypeptide:_yz1	3	219881372	219884342	-	1901	-	NA	CBS
gene:Zm00001d002455	110.2239053	61.26058192	95.42843053	24.64841468	15.82242015	17.38981445	88.97097258	19.28688309	2.200412154	2.07E-05	0.001159072	-	2	13189111	13192192	-	2110	-	NA	-
gene:Zm00001d016076	33.83109964	25.02192783	138.8049899	7.584127592	1.130172868	2.745760176	65.88600578	3.820020212	4.09025168	2.12E-05	0.001181936	-	5	143178921	143179220	-	300	-	NA	-
gene:Zm00001d015153	109.1325795	18.11932705	60.72718306	245.5361308	492.7553705	475.0165104	62.65969653	404.4360039	-2.694487846	2.13E-05	0.001183609	bZIP-transcription_factor_60	5	77126570	77127082	-	513	-	NA	bZIP_1
gene:Zm00001d014392	7.639280564	41.41560468	17.35062373	0	0	0	22.13516966	0	6.924322807	2.14E-05	0.00118635	-	5	44433059	44433846	-	610	-	NA	-
gene:Zm00001d046801	1893.450254	1925.825618	2133.162796	831.4099873	762.8666859	432.9148544	1984.146222	675.7305092	1.554263629	2.15E-05	0.001190274	-	9	106477168	106481139	-	2439	-	NA	Peptidase_S28
gene:Zm00001d015520	685.3525992	564.2876138	697.8806435	289.1448645	212.4724992	266.338737	649.1736188	255.9853669	1.34150532	2.20E-05	0.001216899	-	5	95614609	95620842	-	3521	-	NA	AAA
gene:Zm00001d021176	198.6212947	149.2687419	441.4769816	59.72500479	22.60345736	7.322027135	263.1223394	29.88349643	3.137499175	2.23E-05	0.001230238	-	7	145030207	145044894	+	2844	-	NA	NB-ARC
gene:Zm00001d043651	39.28772861	40.55277958	40.48478871	1.896031898	6.781037208	5.491520351	40.1084323	4.722863153	3.101575921	2.24E-05	0.001230238	-	3	206031893	206033971	-	1752	-	NA	-
gene:Zm00001d005989	29.46579646	4.314125487	39.52086517	0	0	0	24.43359571	0	7.060751576	2.24E-05	0.001230238	-	2	194858082	194858342	+	261	-	NA	-
gene:Zm00001d002372	874.1519617	786.8964889	823.1907037	360.2460606	174.0466217	141.8642757	828.0797181	225.3856527	1.876887021	2.26E-05	0.001240611	-	2	11320826	11324747	-	2327	-	NA	YTH
gene:Zm00001d036515	2.18265159	0	0.963923541	19.90833493	48.59743333	23.79658819	1.048858377	30.76745215	-4.951917113	2.29E-05	0.001251283	-	6	90966326	90966763	-	438	-	NA	-
gene:Zm00001d010375	63.2968961	61.26058192	490.6370822	21.80436683	19.21293876	6.406773743	205.0648534	15.80802644	3.700508943	2.30E-05	0.001253626	-	8	111876535	111878884	+	2073	-	NA	PFK
gene:Zm00001d004804	498.7358882	395.1738946	1200.084808	164.0067592	71.20089069	21.05082801	697.998197	85.41949263	3.030485965	2.31E-05	0.001258043	-	2	140341974	140345724	+	2618	-	NA	-
gene:Zm00001d005879	114.5892085	17.25650195	485.8174645	11.37619139	19.21293876	6.406773743	205.887725	12.33196796	4.067725286	2.39E-05	0.001298508	-	2	191548746	191549021	-	276	-	NA	-
gene:Zm00001d021660	28.37447067	21.57062744	8.675311866	0	0	0	19.54013666	0	6.739119361	2.42E-05	0.001313048	-	7	159408976	159414207	+	4896	-	NA	-
gene:Zm00001d048145	108.0412537	163.0739434	131.0936015	383.9464594	319.8389217	419.1860535	134.0695995	374.3238115	-1.479921474	2.43E-05	0.001313048	-	9	150819610	150827514	-	2175	-	NA	SAM_decarbox
gene:Zm00001d048215	112.4065569	18.98215214	87.7170422	8.532143541	1.130172868	6.406773743	73.0352504	5.356363384	3.747508753	2.44E-05	0.001315561	-	9	152594876	152596298	+	1320	-	NA	WW
gene:Zm00001d007764	338.3109964	227.7858257	913.7995166	124.1900893	31.64484031	38.44064246	493.2987796	64.75852403	2.927612506	2.48E-05	0.001335484	-	2	239261101	239265459	+	2859	-	NA	Galactosyl_T
gene:Zm00001d041489	28.37447067	26.74757802	25.06201206	89.11349921	84.7629651	116.2371808	26.72802025	96.70454836	-1.857257471	2.49E-05	0.001337017	Homeobox-transcription_factor_25	3	123607100	123613712	-	4415	-	NA	START
gene:Zm00001d011081	1558.413235	2535.842962	3267.700803	889.2389602	819.3753293	659.8976955	2453.985666	789.503995	1.636266126	2.50E-05	0.001337017	-	8	138418132	138420302	-	772	-	NA	-
gene:Zm00001d034978	344.8589512	166.5252438	305.5637624	769.7889506	801.2925635	1214.541251	272.3159858	928.5409217	-1.770836265	2.50E-05	0.001337017	-	6	669527	670473	-	854	-	NA	HMA
gene:Zm00001d043912	283.7447067	154.4456924	553.2921124	59.72500479	61.02933488	84.20331205	330.4941705	68.31921724	2.273123813	2.56E-05	0.001366098	-	3	213676301	213677814	+	1427	-	NA	Usp
gene:Zm00001d028630	21916.00461	13154.63144	32550.73405	8116.912556	5662.166069	4133.284318	22540.4567	5970.787647	1.916516553	2.69E-05	0.001431254	-	1	41454240	41456420	+	2070	-	NA	HSP70
gene:Zm00001d038840	1549.682629	2235.579828	2431.01517	846.5782425	846.4994782	662.6434557	2072.092542	785.2403921	1.400144826	2.69E-05	0.001432982	voltage-dependent_anion_channel_protein2	6	165624432	165627829	+	1328	-	NA	-
gene:Zm00001d039260	702.8138119	434.8638491	679.5660962	1349.026695	1881.737825	1883.59148	605.7479191	1704.785334	-1.493176925	2.70E-05	0.001432982	golden_plant2	3	750258	754984	+	2447	-	NA	Myb_DNA-binding
gene:Zm00001d046440	171.3381498	69.8888329	115.6708249	338.4416938	446.4182829	535.4232342	118.9659359	440.0944036	-1.889954354	2.72E-05	0.001440327	-	9	89862594	89864336	+	1491	-	NA	FAD_binding_3
gene:Zm00001d005795	784.6632465	842.1172951	1590.473842	368.7782042	332.2708232	225.1523344	1072.418128	308.7337873	1.796738825	2.77E-05	0.001466648	-	2	188910705	188919424	-	1332	-	NA	-
gene:Zm00001d012101	1084.77784	1030.213166	1196.229114	535.6290112	454.329493	479.5927773	1103.74004	489.8504272	1.171736076	2.80E-05	0.001478226	-	8	168277736	168281863	+	2598	-	NA	-
gene:Zm00001d012527	922.1702966	412.4303966	2783.811185	284.4047847	105.1060767	50.33893655	1372.80396	146.6165993	3.2267485	2.81E-05	0.00147917	NAC-transcription_factor_23	8	176104082	176105842	+	1500	-	NA	NAM
gene:Zm00001d011315	85.123412	2074.231534	1039.109577	78.68532377	126.5793612	19.22032123	1066.154841	74.82833541	3.834425379	2.82E-05	0.00147917	-	8	146513037	146520523	-	6410	-	NA	ABC2_membrane
gene:Zm00001d044028	58.93159292	385.6828186	11.56708249	0	0	0	152.060498	0	9.700796489	2.87E-05	0.001502971	-	3	217226982	217228430	-	502	-	NA	-
gene:Zm00001d030790	559.8501327	534.0887353	739.3293557	259.75637	244.1173395	192.2032123	611.0894079	232.0256406	1.397460597	2.88E-05	0.001508623	-	1	159877875	159884491	+	3816	-	NA	Glyco_transf_8
gene:Zm00001d005392	1256.11599	2601.417669	2992.01867	792.5413334	628.3761146	426.5080806	2283.18411	615.8085096	1.890667221	2.90E-05	0.001516614	-	2	172065137	172067442	+	2212	-	NA	-
gene:Zm00001d040263	547.845549	513.380933	596.6686717	198.1353334	263.3302783	172.0676377	552.6317179	211.1777498	1.389222834	2.92E-05	0.001517191	-	3	34652668	34657191	+	2361	-	NA	Pkinase
gene:Zm00001d016627	0	0	0	4.740079745	18.08276589	48.50842977	0	23.7770918	-7.062221595	2.92E-05	0.001517191	-	5	170634533	170637764	-	1998	-	NA	Thaumatin
gene:Zm00001d022026	117.8631858	76.79143368	335.4453922	32.23254227	9.041382944	2.745760176	176.7000039	14.67322846	3.587506425	2.92E-05	0.001517559	-	7	168235505	168239964	+	2636	-	NA	-
gene:Zm00001d034756	154.9682629	44.86690507	333.5175451	1322.482249	791.1210076	1357.32078	177.7842377	1156.974679	-2.702775737	2.93E-05	0.001518678	-	1	301479326	301479550	-	225	-	NA	-
gene:Zm00001d039814	29.46579646	27.61040312	5.783541244	0	0	0	20.95324694	0	6.840726617	2.99E-05	0.001543413	-	3	15586433	15590487	-	3802	-	NA	-
gene:Zm00001d046634	37.10507702	26.74757802	317.1308449	11.37619139	7.911210076	2.745760176	126.9945	7.344387214	4.115026387	3.00E-05	0.001543413	-	9	99852163	99852489	-	327	-	NA	-
gene:Zm00001d035604	168.0641724	46.59255526	111.8151307	403.8547943	595.6011015	446.6436552	108.8239528	482.0331837	-2.149790651	3.00E-05	0.001543413	MYB-transcription_factor_62	6	36325267	36326373	-	1107	-	NA	Myb_DNA-binding
gene:Zm00001d026278	73.11882825	18.98215214	85.78919512	309.0531994	343.5725519	261.7624701	59.29672517	304.7960738	-2.365000186	3.02E-05	0.001550583	-	10	142737422	142739168	+	808	-	NA	-
gene:Zm00001d008886	34.92242543	42.27842978	55.90756536	5.688095694	0	0	44.36947352	1.896031898	4.517405032	3.07E-05	0.001569673	-	8	24100309	24103784	+	1561	-	NA	CCT
gene:Zm00001d053997	695.1745313	1230.388589	929.2222932	403.8547943	232.8156108	256.2709497	951.5951378	297.6471183	1.676543663	3.07E-05	0.001569673	GRMZM2G374088	4	244821758	244829813	-	7694	-	NA	Pkinase
gene:Zm00001d041794	797.759156	566.0132639	794.2729975	124.1900893	302.8863286	187.6269453	719.3484725	204.9011211	1.813107175	3.15E-05	0.001609365	-	3	138412583	138413068	+	486	-	NA	-
gene:Zm00001d024424	221.5391364	375.3289174	300.7441447	109.0218341	70.07071782	102.5083799	299.2040661	93.86697728	1.671194701	3.19E-05	0.001627153	HIP	10	70414238	70420011	-	4974	-	NA	-
gene:Zm00001d042395	976.7365864	465.0627275	1338.889798	262.6004179	271.2414883	195.8642259	926.8963706	243.2353774	1.930204826	3.24E-05	0.001645273	-	3	164412499	164415646	-	875	-	NA	-
gene:Zm00001d006854	25.10049328	24.15910273	7.711388325	0	0	0	18.99032811	0	6.698910852	3.24E-05	0.001646282	-	2	217962433	217965476	-	813	-	NA	-
gene:Zm00001d006489	108.0412537	47.45538036	577.3902009	32.23254227	18.08276589	10.9830407	244.2956116	20.43278295	3.579393663	3.29E-05	0.00166431	-	2	209778893	209779471	-	579	-	NA	-
gene:Zm00001d006793	241.1830007	229.5114759	207.2435612	89.11349921	71.20089069	91.52533919	225.9793459	83.94657636	1.42651808	3.39E-05	0.001711277	-	2	216853848	216858411	+	2714	-	NA	Pkinase_Tyr
gene:Zm00001d043992	168.0641724	257.1218791	189.8929375	77.73730782	58.76898914	64.98299082	205.0263297	67.16309593	1.60982051	3.40E-05	0.001717177	bZIP_transcription_factor1	3	215850507	215866477	+	1901	-	NA	bZIP_1
gene:Zm00001d007319	659.1607801	433.1381989	613.0553719	2074.258897	1569.810114	1227.354799	568.4514503	1623.807936	-1.514654198	3.44E-05	0.001729349	-	2	228322442	228327030	+	2563	-	NA	Peptidase_S8
gene:Zm00001d007450	0	2.588475292	0.963923541	42.66071771	7.911210076	71.38976457	1.184132944	40.65389745	-5.039556008	3.47E-05	0.001745195	-	2	231999644	232003137	+	612	-	NA	-
gene:Zm00001d016664	3444.224208	5323.630851	10122.1611	1828.722766	444.1579371	309.3556465	6296.672054	860.7454498	2.870827818	3.49E-05	0.001748025	-	5	171903271	171908275	+	3465	-	NA	AAA
gene:Zm00001d015829	915.6223419	978.4436605	1774.583238	480.6440862	266.7207969	220.5760674	1222.88308	322.6469835	1.922085495	3.51E-05	0.001754335	-	5	124544275	124549833	-	3548	-	NA	E1-E2_ATPase
gene:Zm00001d028408	118.9545116	134.6007152	935.969758	37.92063796	50.85777906	42.10165603	396.5083283	43.62669102	3.184915497	3.54E-05	0.001768157	heat_shock_protein26	1	33789050	33790182	+	1032	-	NA	-
gene:Zm00001d031157	78.57545723	2509.095383	1195.26519	61.62103669	158.2242015	20.13557462	1260.978677	79.99360428	3.980442972	3.56E-05	0.0017732	-	1	179888174	179888707	-	534	-	NA	Thaumatin
gene:Zm00001d039769	275.0141003	196.7241222	398.1004223	107.1258022	67.81037208	55.8304569	289.9462149	76.92221041	1.913539978	3.64E-05	0.001809252	-	3	14333996	14339635	+	5155	-	NA	-
gene:Zm00001d006033	1137.161478	324.4222367	273.7542856	84.37341947	5.65086434	2.745760176	578.4460001	30.92334799	4.222831038	3.66E-05	0.001815058	-	2	195811241	195819078	+	6868	-	NA	-
gene:Zm00001d005698	2577.711527	253.6705787	7938.874281	415.2309857	289.3242542	210.5082801	3590.085462	305.0211733	3.557017631	3.66E-05	0.001815058	-	2	183790605	183791147	-	543	-	NA	zf-AN1
gene:Zm00001d031599	290.2926614	170.8393693	223.6302614	85.32143541	53.1181248	35.69488228	228.2540974	58.04481417	1.974478581	3.68E-05	0.001819577	-	1	195873413	195875927	+	934	-	NA	Proteasome
gene:Zm00001d050518	562.0327843	716.1448309	783.6698386	315.689311	198.9104248	170.2371309	687.2824846	228.2789556	1.589995714	3.78E-05	0.001863667	-	4	96149394	96155109	-	5322	-	NA	-
gene:Zm00001d006539	56.74894133	12.07955136	32.77340038	116.6059617	263.3302783	220.5760674	33.86729769	200.1707691	-2.570167081	3.79E-05	0.001863667	-	2	210700847	210703733	+	2283	-	NA	-
gene:Zm00001d012407	307.7538741	213.1177991	358.5795571	68.25714833	77.9819279	16.47456105	293.1504101	54.23787909	2.437540764	3.79E-05	0.001863667	triose_phosphate_isomerase5	8	173978431	173987430	+	5768	-	NA	-
gene:Zm00001d044695	42.561706	79.37990897	75.18603617	6.636111643	16.95259302	10.06778731	65.70921705	11.21883066	2.565090508	3.82E-05	0.001863667	-	3	235100416	235105573	+	1632	-	NA	-
gene:Zm00001d038760	16.36988692	19.84497724	13.49492957	0	0	0	16.56993124	0	6.503342679	3.82E-05	0.001863667	-	6	163970657	163972392	+	1108	-	NA	-
gene:Zm00001d016166	1988.395598	3485.813394	5196.511808	1155.631442	294.9751186	259.9319633	3556.906933	570.1795079	2.640957648	3.82E-05	0.001863667	phosphoenolpyruvate_carboxylase2	5	148208167	148215925	-	5288	-	NA	-
gene:Zm00001d014983	359.0461865	471.1025032	517.6269413	201.9273971	132.2302256	124.4744613	449.2585437	152.8773613	1.554944902	3.83E-05	0.001863667	-	5	71063270	71067861	-	1818	-	NA	Peptidase_S10
gene:Zm00001d029359	177.8861046	478.8679291	607.2718306	65.41310048	12.43190155	0.915253392	421.3419548	26.25341847	4.002892762	3.83E-05	0.001863667	benzoxazinone_synthesis10	1	67311965	67314047	-	1623	-	NA	-
gene:Zm00001d006043	31.64844805	45.72973017	25.06201206	3.792063796	0	0	34.14673009	1.264021265	4.718378104	3.85E-05	0.001868966	-	2	196208545	196208934	-	390	-	NA	UDPGT
gene:Zm00001d043877	18.55253851	40.55277958	93.50058345	2.844047847	0	5.491520351	50.86863385	2.778522733	4.156618654	3.87E-05	0.001877585	NAC-transcription_factor_94	3	212680911	212681900	+	990	-	NA	NAM
gene:Zm00001d031203	4759.271791	3343.447253	5208.07889	1735.817203	1856.874022	1855.218625	4436.932645	1815.96995	1.288781758	3.88E-05	0.001877585	-	1	181978320	181979932	-	1253	-	NA	Abhydrolase_1
gene:Zm00001d041608	846.8688168	847.2942457	1276.234768	398.1666986	306.2768472	175.7286512	990.1326101	293.3907324	1.755073507	3.91E-05	0.001891362	-	3	129601695	129605205	-	1789	-	NA	-
gene:Zm00001d052551	4.365303179	0	0	119.4500096	85.89313797	4.576266959	1.45510106	69.97313817	-5.659812912	3.97E-05	0.001916944	-	4	192868787	192870527	+	1493	-	NA	-
gene:Zm00001d015127	127.685118	122.5211638	318.0947684	47.40079745	29.38449457	43.93216281	189.4336834	40.23915161	2.23232305	4.04E-05	0.001943229	-	5	76604702	76607297	-	899	-	NA	-
gene:Zm00001d002160	0	0	0	11.37619139	15.82242015	22.8813348	0	16.69331545	-6.55118771	4.09E-05	0.001967789	-	2	6893694	6893936	+	243	-	NA	-
gene:Zm00001d031736	32.73977384	23.29627763	126.2739838	5.688095694	0	0	60.77001177	1.896031898	4.975590962	4.12E-05	0.001975726	HSF-transcription_factor_8	1	200197812	200199489	-	1586	-	NA	HSF_DNA-bind
gene:Zm00001d044646	2016.770069	3160.528332	2562.108771	1164.163585	872.4934541	998.5414505	2579.802391	1011.73283	1.350403433	4.18E-05	0.002002302	glucosamine_fructose-6-phosphate_aminotransferase1	3	233922381	233938435	+	11659	-	NA	-
gene:Zm00001d040028	86.21473779	182.0560956	92.53665991	20.85635088	1.130172868	0.915253392	120.2691644	7.633925713	3.967885134	4.45E-05	0.00212689	-	3	23433456	23434226	-	625	-	NA	-
gene:Zm00001d014611	356.8635349	103.5390117	550.4003417	81.52937162	41.81639612	44.8474162	336.9342961	56.06439465	2.585775618	4.49E-05	0.002139867	-	5	55313125	55314896	-	711	-	NA	ABC_tran
gene:Zm00001d014957	762.8367306	1308.905673	1421.787223	3081.051834	3389.388431	3097.217478	1164.509875	3189.219248	-1.45320618	4.50E-05	0.002140904	-	5	69975365	69978349	-	1675	-	NA	-
gene:Zm00001d033051	22.91784169	39.68995448	3.855694163	0	0	0	22.15449678	0	6.923108451	4.55E-05	0.0021615	-	1	248675374	248679525	+	1739	-	NA	-
gene:Zm00001d032578	134.2330728	44.86690507	244.8365793	23.70039873	16.95259302	23.79658819	141.3121857	21.48319331	2.714152517	4.56E-05	0.002163058	C2C2-Dof-transcription_factor_13	1	231149171	231150619	+	1198	-	NA	zf-Dof
gene:Zm00001d002934	62.20557031	24.15910273	19.27847081	151.6825518	161.6147201	174.8133978	35.21438128	162.7035566	-2.215933719	4.76E-05	0.002254934	NAC-transcription_factor_103	2	27119340	27120568	-	987	-	NA	NAM
gene:Zm00001d026055	120.0458374	102.6761866	62.65503014	301.4690718	318.7087488	253.5251895	95.12568473	291.2343367	-1.615030035	4.85E-05	0.002290834	GRMZM2G098676	10	137223044	137225822	+	2256	-	NA	-
gene:Zm00001d037978	194.2559915	182.9189207	300.7441447	77.73730782	68.94054495	77.79653831	225.9730189	74.82479703	1.593667403	4.86E-05	0.002291054	-	6	144038433	144042697	+	2294	-	NA	-
gene:Zm00001d015036	130.9590954	72.47730819	116.6347484	276.8206571	324.3596131	342.3047686	106.690384	314.4950129	-1.562098953	4.90E-05	0.002305966	Rho-related_protein_from_plants_9	5	72869353	72873307	-	3829	-	NA	-
gene:Zm00001d015555	73.11882825	127.6981144	6.747464785	0.948015949	2.260345736	6.406773743	69.18813582	3.205045143	4.420097825	4.91E-05	0.002305966	-	5	97408121	97408529	-	240	-	NA	-
gene:Zm00001d025146	13.09590954	16.39367685	49.16010057	0	1.130172868	0	26.21656232	0.376724289	6.203357559	4.94E-05	0.002315046	-	10	106549886	106558251	+	393	-	NA	-
gene:Zm00001d014945	674.4393412	239.8653771	3901.962493	182.9670782	101.7155581	10.9830407	1605.422404	98.55522566	4.026101712	4.95E-05	0.00231723	-	5	69417478	69418622	+	1145	-	NA	-
gene:Zm00001d046234	2276.505608	459.885777	830.9020921	208.5635088	282.543217	100.6778731	1189.097826	197.261533	2.592214645	5.03E-05	0.002350379	-	9	73800614	73803659	-	1312	-	NA	-
gene:Zm00001d007329	16.36988692	157.8969928	97.35627761	5.688095694	9.041382944	0	90.54105246	4.909826213	4.227098523	5.08E-05	0.002368631	WRKY-transcription_factor_108	2	228732533	228737268	+	1011	-	NA	WRKY
gene:Zm00001d013557	0	0	0	14.22023924	19.21293876	13.72880088	0	15.72065962	-6.462290111	5.13E-05	0.002389729	-	5	14232577	14235696	+	1031	-	NA	-
gene:Zm00001d050864	541.2975942	549.6195871	2951.533882	258.8083541	141.2716085	42.10165603	1347.483688	147.3938729	3.192641821	5.28E-05	0.002454042	-	4	127438148	127438405	-	258	-	NA	-
gene:Zm00001d016291	0	0	0	12.32420734	19.21293876	15.55930766	0	15.69881792	-6.460423098	5.37E-05	0.002488812	-	5	155864292	155865206	-	915	-	NA	-
gene:Zm00001d042278	84.0320862	36.23865409	114.7069013	4.740079745	18.08276589	3.661013567	78.32588055	8.827953067	3.171624075	5.44E-05	0.002519756	-	3	158631062	158636654	+	2488	-	NA	-
gene:Zm00001d002399	20.7351901	2.588475292	10.60315895	77.73730782	82.50261937	78.7117917	11.30894145	79.65057296	-2.836315114	5.56E-05	0.002569444	-	2	11967708	11971843	+	1507	-	NA	-
gene:Zm00001d016564	0	0	0	6.636111643	44.07674185	10.9830407	0	20.56529807	-6.846663017	5.57E-05	0.002569444	-	5	167727847	167728356	+	510	-	NA	-
gene:Zm00001d018152	49.10966077	12.94237646	4.819617703	0	0	0	22.29055164	0	6.926783049	5.68E-05	0.00261698	-	5	215594980	215596255	-	851	-	NA	-
gene:Zm00001d003508	435.4389921	112.1672627	924.4026755	70.15318023	93.80434805	57.66096369	490.6696434	73.87283066	2.73252433	5.78E-05	0.002655158	-	2	46235133	46238916	+	2247	-	NA	-
gene:Zm00001d013506	368.8681187	220.0203999	194.7125552	591.5619522	893.9667386	999.4567039	261.2003579	828.3284649	-1.666016838	5.85E-05	0.002686238	-	5	12949143	12955205	-	1511	-	NA	-
gene:Zm00001d043151	111.3152311	267.4757802	223.6302614	559.3294099	697.3166596	712.9823923	200.8070909	656.5428206	-1.707396499	5.96E-05	0.002727938	-	3	190214692	190220053	-	1468	-	NA	-
gene:Zm00001d045042	1205.915003	1845.582884	1335.998027	579.2377449	566.2166069	305.6946329	1462.498638	483.7163282	1.596716059	6.00E-05	0.002744609	shrunken1	9	10906934	10912944	+	4021	-	NA	Glycos_transf_1
gene:Zm00001d033061	192.0733399	76.79143368	166.7587725	355.5059809	560.5657426	989.3889166	145.2078487	635.1535467	-2.130560467	6.24E-05	0.002845865	-	1	249093563	249101622	-	1877	-	NA	-
gene:Zm00001d048358	8732.78901	7262.398846	10694.73168	3957.018571	1637.620486	1341.761472	8896.639847	2312.13351	1.943980551	6.27E-05	0.002854156	aconitase3	9	154915042	154923673	-	3838	-	NA	Aconitase
gene:Zm00001d042541	56.74894133	941.3421814	169.6505432	52.1408772	16.95259302	32.94912211	389.2472219	34.01419744	3.514819341	6.36E-05	0.002889736	lipoxygenase1	3	171421717	171425401	+	2970	-	NA	Lipoxygenase
gene:Zm00001d023257	146.2376565	2.588475292	104.1037424	3.792063796	3.390518604	4.576266959	84.30995806	3.919616453	4.421843835	6.37E-05	0.002892341	-	10	1491777	1493140	-	1244	-	NA	-
gene:Zm00001d052137	667.8913864	111.3044376	724.8705026	91.95754706	94.93452092	55.8304569	501.3554422	80.90750829	2.631887855	6.43E-05	0.002913352	-	4	180619203	180621336	+	1006	-	NA	-
gene:Zm00001d026277	140.7810275	86.28250975	48.19617703	272.0805774	393.3001581	379.8301576	91.75323811	348.403631	-1.927012413	6.47E-05	0.002927193	coproporphyrinogen_III_oxidase2	10	142707254	142721455	+	1673	-	NA	-
gene:Zm00001d046805	37.10507702	3.45130039	141.6967605	0.948015949	3.390518604	0	60.75104596	1.446178184	5.448678957	6.49E-05	0.002928531	WRKY-transcription_factor_124	9	106603130	106604806	-	1426	-	NA	WRKY
gene:Zm00001d018011	100.4019731	41.41560468	142.660684	395.3226508	383.1286023	348.7115423	94.82608727	375.7209318	-1.988063729	6.60E-05	0.002975723	-	5	211975629	211984184	-	2463	-	NA	-
gene:Zm00001d006578	696.2658571	966.3641092	653.5401606	289.1448645	288.1940814	349.6267957	772.056709	308.9885805	1.321133811	6.62E-05	0.002979554	bHLH-transcription_factor_80	2	211375734	211378716	-	1926	-	NA	HLH
gene:Zm00001d024455	0	0	0	11.37619139	21.47328449	13.72880088	0	15.52609225	-6.443409673	6.73E-05	0.003021394	-	10	71687709	71688619	+	529	-	NA	-
gene:Zm00001d014313	2.18265159	0	4.819617703	18.01230303	66.68019922	36.61013567	2.334089764	40.43421264	-4.133452335	6.75E-05	0.003024218	-	5	40589082	40591437	-	1564	-	NA	Thaumatin
gene:Zm00001d053952	175.703453	60.39775682	304.5998389	32.23254227	38.42587751	21.9660814	180.2336829	30.87483373	2.54747869	6.76E-05	0.003024218	-	4	244166895	244169117	+	1165	-	NA	-
gene:Zm00001d009022	55.65761554	68.1631827	73.25818909	179.1750144	448.6786286	174.8133978	65.69299578	267.5556803	-2.023805066	6.83E-05	0.003048965	-	8	30341792	30343500	-	1645	-	NA	NmrA
gene:Zm00001d024256	50.20098656	31.06170351	26.98985914	0	0	4.576266959	36.08418307	1.52542232	4.503484382	6.89E-05	0.00307414	-	10	59897138	59898746	-	750	-	NA	-
gene:Zm00001d013617	12.00458374	3.45130039	109.8872836	0.948015949	0	0	41.78105592	0.316005316	6.875037012	6.91E-05	0.003074839	-	5	15578282	15578608	-	327	-	NA	Auxin_inducible
gene:Zm00001d017079	116.77186	105.2646619	68.43857139	245.5361308	281.4130441	292.8810854	96.82503111	273.2767534	-1.497661422	6.94E-05	0.003083803	-	5	184659751	184662560	+	2254	-	NA	-
gene:Zm00001d046728	38.19640282	21.57062744	40.48478871	119.4500096	120.9284969	107.0846468	33.41727299	115.8210511	-1.797915452	6.98E-05	0.003098026	-	9	103756845	103757420	+	576	-	NA	-
gene:Zm00001d011577	92.76269256	214.8434493	188.929014	49.29682935	36.16553178	45.76266959	165.5117186	43.74167691	1.91937997	7.14E-05	0.003148752	-	8	154834948	154839347	+	1869	-	NA	-
gene:Zm00001d011420	16.36988692	22.43345253	46.26832995	1.896031898	0	0	28.35722314	0.632010633	5.441810628	7.15E-05	0.003148752	-	8	150003296	150005437	+	1839	-	NA	p450
gene:Zm00001d049273	282.6533809	764.4630364	484.853541	183.9150941	83.63279224	67.728751	510.6566527	111.7588791	2.191798176	7.15E-05	0.003148752	-	4	23998240	24004490	+	2588	-	NA	-
gene:Zm00001d041067	663.5260833	204.4895481	114.7069013	1520.617582	1887.38869	1910.133829	327.5741776	1772.713367	-2.436965684	7.15E-05	0.003148752	sugars_will_eventually_be_exported_transporter13c	3	94632377	94634331	+	1322	-	NA	-
gene:Zm00001d033980	256.4615618	327.873537	260.259356	81.52937162	106.2362496	35.69488228	281.5314849	74.4868345	1.922042426	7.24E-05	0.003178849	ustilago_maydis_induced12	1	279980867	279981749	+	792	-	NA	-
gene:Zm00001d023858	0	0	0	11.37619139	13.56207442	21.05082801	0	15.32969794	-6.428652521	7.26E-05	0.003178849	-	10	25245123	25248808	-	3465	-	NA	-
gene:Zm00001d031569	3551.174136	9416.010289	5976.325952	2278.082326	1662.484289	1781.998354	6314.503459	1907.521656	1.72698805	7.26E-05	0.003178849	-	1	194687973	194691805	+	2340	-	NA	FKBP_C
gene:Zm00001d036929	7.639280564	44.00407997	8.675311866	0	0	0	20.10622413	0	6.785845252	7.27E-05	0.003178849	-	6	106704041	106706934	+	1493	-	NA	-
gene:Zm00001d020953	24.00916749	100.0877113	84.82527158	14.22023924	4.520691472	4.576266959	69.64071679	7.772399222	3.15843681	7.34E-05	0.003204308	-	7	137599102	137608563	-	1723	-	NA	-
gene:Zm00001d002435	38.19640282	2.588475292	253.5118912	2.844047847	4.520691472	0	98.0989231	2.454913106	5.344704718	7.68E-05	0.003346203	-	2	12596887	12598336	+	1262	-	NA	AOX
gene:Zm00001d036402	315.3931547	378.7802178	635.2256133	128.9301691	161.6147201	146.4405427	443.1329953	145.6618106	1.605856281	7.72E-05	0.003358637	-	6	86950406	86955764	-	2456	-	NA	-
gene:Zm00001d036866	3.273977384	6.039775682	2.891770622	28.44047847	35.03535891	34.77962889	4.068507896	32.75182209	-2.991553815	7.77E-05	0.003376079	-	6	104862139	104864667	-	1065	-	NA	-
gene:Zm00001d010812	170.246824	133.7378901	381.7137221	66.36111643	47.46726046	24.71184158	228.5661454	46.18007282	2.308017325	7.94E-05	0.003437923	HSF-transcription_factor_16	8	128602960	128604732	+	1350	-	NA	HSF_DNA-bind
gene:Zm00001d037006	10.91325795	70.75165799	24.09808852	86.26945136	325.489786	477.7622706	35.25433482	296.5071693	-3.066445887	7.95E-05	0.003437923	-	6	108817945	108828900	-	9658	-	NA	-
gene:Zm00001d026291	115.6805343	358.9352406	188.929014	66.36111643	41.81639612	24.71184158	221.1815963	44.29645138	2.3212745	7.95E-05	0.003437923	DNA_methyl_transferase2	10	142982967	142990366	-	4578	-	NA	-
gene:Zm00001d034387	595.863884	1069.903121	538.8332592	270.1845455	216.9931907	252.6099362	734.8667547	246.5958908	1.575358435	7.99E-05	0.003449906	aldehyde_oxidase1	1	291605273	291613251	-	5662	-	NA	Fer2
gene:Zm00001d015258	619.8730515	850.7455461	134.9492957	99.54167465	10.17155581	5.491520351	535.1892978	38.4015836	3.798927224	8.09E-05	0.003483244	-	5	81746880	81751111	+	2230	-	NA	Peptidase_S8
gene:Zm00001d024540	544.5715716	798.9760403	816.443239	330.8575662	259.9397597	211.4235335	719.9969503	267.4069531	1.429287037	8.21E-05	0.003530079	stomatin1	10	77144191	77149860	-	1638	-	NA	-
gene:Zm00001d016792	420.160431	663.5125	692.0971022	260.704386	198.9104248	188.5421987	591.9233444	216.0523365	1.454213355	8.29E-05	0.003559726	-	5	176048084	176052602	-	2919	-	NA	-
gene:Zm00001d005977	28.37447067	22.43345253	36.62909455	3.792063796	1.130172868	0	29.14567258	1.640745555	4.145143557	8.45E-05	0.003623284	-	2	194528932	194529228	-	297	-	NA	-
gene:Zm00001d048623	213.8998558	279.5553316	147.4803017	469.2678948	831.8072309	671.7959896	213.645163	657.6237051	-1.621194344	8.50E-05	0.003635201	MYB-transcription_factor_88	4	1532822	1534194	+	1185	-	NA	Myb_DNA-binding
gene:Zm00001d042055	620.9643773	868.0020481	753.7882088	356.4539968	270.1113155	307.5251397	747.584878	311.363484	1.263484338	8.55E-05	0.003650845	Zea_mays_ARGOS6	3	148888995	148896597	-	2624	-	NA	-
gene:Zm00001d034725	779.2066175	570.3273894	610.1636013	121.3460415	230.5552651	274.5760176	653.2325361	208.8257747	1.64522857	8.59E-05	0.003664919	-	1	300790094	300803516	-	1383	-	NA	-
gene:Zm00001d006841	154.9682629	159.622643	174.4701609	46.4527815	7.911210076	4.576266959	163.0203556	19.64675285	3.048332001	8.76E-05	0.003728534	-	2	217691873	217694797	-	1323	-	NA	-
gene:Zm00001d012108	481.2746755	317.5196359	242.9087323	887.3429283	985.5107409	999.4567039	347.2343479	957.4367911	-1.46403735	8.83E-05	0.003748648	-	8	168364890	168371205	-	5461	-	NA	-
gene:Zm00001d007077	925.444274	1064.72617	825.1185508	327.0655024	374.0872193	473.1860036	938.429665	391.4462418	1.261297284	8.84E-05	0.003748648	-	2	221760272	221762560	+	923	-	NA	-
gene:Zm00001d037857	26.19181908	17.25650195	40.48478871	1.896031898	0	2.745760176	27.97770324	1.547264025	4.121270966	8.85E-05	0.003748648	-	6	139910837	139911723	-	784	-	NA	-
gene:Zm00001d047209	2840.721044	3890.478365	3715.925249	1763.309665	1032.978001	990.30417	3482.374886	1262.197279	1.464083479	8.88E-05	0.003749035	-	9	122112583	122121985	+	7241	-	NA	CG-1
gene:Zm00001d029630	5.456628974	6.039775682	110.8512072	0	1.130172868	0	40.78253728	0.376724289	6.840394807	8.89E-05	0.003749035	cystatin6	1	80665246	80665596	-	351	-	NA	-
gene:Zm00001d003200	1160.07932	842.9801202	1953.873017	520.460756	359.394972	340.4742618	1318.977486	406.7766633	1.69691471	8.89E-05	0.003749035	-	2	35415696	35425758	-	2163	-	NA	-
gene:Zm00001d000196	527.1103589	307.1657347	1760.124385	220.8877161	94.93452092	64.06773743	864.8001596	126.6299915	2.771414472	8.96E-05	0.003769589	-	B73V4_ctg178	204778	207105	-	1721	-	NA	MatE
gene:Zm00001d024853	5577.766137	3571.233078	7817.419915	2256.277959	1766.460193	1865.286413	5655.473044	1962.674855	1.526760771	9.08E-05	0.003814673	1-aminocyclopropane-1-carboxylate_oxidase15	10	90664003	90665073	+	1071	-	NA	2OG-FeII_Oxy
gene:Zm00001d023453	7.639280564	0	0.963923541	31.28452632	42.94656899	61.32197726	2.867734701	45.18435752	-4.037135683	9.21E-05	0.003864655	-	10	6068261	6068701	+	441	-	NA	-
gene:Zm00001d035689	20.7351901	24.15910273	78.0778068	0	4.520691472	0	40.99069988	1.506897157	4.85887184	9.25E-05	0.003872253	cysteine_protease5	6	41139965	41141457	-	1412	-	NA	Peptidase_C1
gene:Zm00001d033987	43.65303179	17.25650195	102.1758953	3.792063796	0	6.406773743	54.36180969	3.399612513	3.966124011	9.27E-05	0.003872253	HSF-transcription_factor_17	1	280368696	280370932	-	1844	-	NA	HSF_DNA-bind
gene:Zm00001d037783	465.9961144	549.6195871	669.9268608	178.2269984	135.6207442	33.8643755	561.8475208	115.9040394	2.278221249	9.28E-05	0.003872253	protein_kinase1	6	137664274	137666727	+	2454	-	NA	Pkinase
gene:Zm00001d020251	177.8861046	28.47322822	646.7926958	40.76468581	16.95259302	7.322027135	284.3840095	21.67976865	3.71271553	9.38E-05	0.003901663	-	7	102313104	102313781	+	678	-	NA	-
gene:Zm00001d042008	4.365303179	0	0	10.42817544	27.12414883	124.4744613	1.45510106	54.00892852	-5.290081049	9.39E-05	0.003901663	-	3	147180025	147180645	-	621	-	NA	Rubredoxin
gene:Zm00001d046865	21.8265159	75.92860858	141.6967605	8.532143541	4.520691472	13.72880088	79.81729499	8.927211964	3.15073124	9.40E-05	0.003901663	-	9	108535285	108541755	+	2450	-	NA	-
gene:Zm00001d032344	402.6992183	141.503316	288.2131387	870.2786412	1263.533266	818.2365323	277.471891	984.0161467	-1.827329437	9.45E-05	0.003917847	-	1	223288106	223291611	+	3430	-	NA	Pkinase
gene:Zm00001d041590	270.6487971	55.22080624	57.83541244	493.9163095	990.0314324	793.5246908	127.9016719	759.1574775	-2.571632573	9.51E-05	0.003935049	rotten_ear2	3	128629007	128633579	+	2889	-	NA	-
gene:Zm00001d012988	156.0595887	80.24273407	189.8929375	347.9218533	504.0570992	615.0502793	142.0650867	489.0097439	-1.784585858	9.54E-05	0.003942277	-	5	2849021	2850279	+	995	-	NA	-
gene:Zm00001d018309	2745.7757	2697.191255	3558.805712	1528.20171	1239.799636	1165.117568	3000.590889	1311.039638	1.194502346	9.64E-05	0.003978769	MSS1_homolog	5	218238432	218242413	-	3412	-	NA	AAA
gene:Zm00001d044667	247.7309554	93.18511053	58.79933598	602.9381436	504.0570992	695.5925778	133.2384673	600.8626069	-2.175367021	9.83E-05	0.004050423	C3H-transcription_factor_348	3	234427651	234431985	+	3684	-	NA	-
gene:Zm00001d015956	3164.844805	4603.171895	3425.784264	1593.61481	1792.454169	1436.947825	3731.266988	1607.672268	1.21487445	9.89E-05	0.004066559	-	5	134163807	134172264	+	3643	-	NA	Epimerase
gene:Zm00001d047352	54.56628974	15.53085175	1.927847081	0	0	0	24.00832953	0	7.0346621	0.000100524	0.004126436	-	9	127264585	127268652	-	3354	-	NA	-
gene:Zm00001d040764	3.273977384	0	0	4.740079745	68.94054495	61.32197726	1.091325795	45.00086732	-5.454208619	0.000100669	0.004126436	-	3	64374083	64376249	-	1797	-	NA	p450
gene:Zm00001d017462	494.3705851	70.75165799	1545.169436	116.6059617	48.59743333	36.61013567	703.4305596	67.27117691	3.385816289	0.000101062	0.004135869	AP2-EREBP-transcription_factor_195	5	196589211	196590059	-	849	-	NA	AP2
gene:Zm00001d000184	613.3250967	600.5262678	565.8231184	303.3651037	240.7268209	199.5252394	593.2248276	247.872388	1.258977948	0.000101698	0.004155221	MYB-related-transcription_factor_31	B73V4_ctg181	314008	317339	-	1524	-	NA	Myb_DNA-binding
gene:Zm00001d038820	231.3610685	565.1504389	301.7080682	126.0861212	103.9759039	78.7117917	366.0731919	102.9246056	1.83167078	0.00010247	0.004180031	-	6	165215562	165222835	+	1853	-	NA	-
gene:Zm00001d042869	8012.513986	8758.537565	10687.98422	4316.316616	3479.802261	2115.150589	9153.011923	3303.756488	1.47017413	0.000104164	0.004236027	-	3	182508943	182514234	-	4901	-	NA	Aldo_ket_red
gene:Zm00001d039183	3960.421309	4188.153023	4078.360501	1645.755688	395.5605038	339.5590084	4075.644944	793.6250666	2.360334021	0.000104177	0.004236027	-	6	172092066	172094056	+	1921	-	NA	AAA
gene:Zm00001d020652	9.821932153	3.45130039	102.1758953	0	1.130172868	0	38.48304262	0.376724289	6.756459427	0.000104752	0.004252608	-	7	126624012	126624968	-	957	-	NA	-
gene:Zm00001d035556	0	0	0	4.740079745	19.21293876	27.45760176	0	17.13687342	-6.588245415	0.000105716	0.004284868	-	6	33036109	33036831	+	723	-	NA	-
gene:Zm00001d011425	147.3289823	1.725650195	314.2390743	11.37619139	5.65086434	3.661013567	154.4312356	6.896023099	4.483583766	0.000107359	0.00434454	-	8	150203248	150204629	+	1344	-	NA	Peptidase_S10
gene:Zm00001d036485	49.10966077	50.90668075	141.6967605	18.96031898	11.30172868	7.322027135	80.571034	12.52802493	2.684975009	0.000108173	0.004370501	-	6	90311423	90317336	-	4070	-	NA	-
gene:Zm00001d009359	823.9509751	903.3778771	1298.405009	466.4238469	377.4777379	356.9488228	1008.577954	400.2834692	1.33320495	0.000108492	0.004376428	-	8	59319117	59322412	+	2550	-	NA	UFD1
gene:Zm00001d011419	589.3159292	132.875065	361.4713278	77.73730782	87.02331084	27.45760176	361.220774	64.07274014	2.496496708	0.000109806	0.004415994	-	8	149989038	149991368	+	2273	-	NA	p450
gene:Zm00001d002260	249.913607	170.8393693	213.0271025	69.20516428	91.54400231	69.55925778	211.2600263	76.76947479	1.461647467	0.000109821	0.004415994	-	2	9089887	9093334	-	2555	-	NA	FMN_dh
gene:Zm00001d049785	628.6036578	666.1009753	503.1680882	1015.325081	2131.506029	2416.268955	599.2909071	1854.366688	-1.629531977	0.000111152	0.004462452	-	4	44633576	44640151	+	3943	-	NA	Exo_endo_phos
gene:Zm00001d006360	127.685118	134.6007152	219.7745673	61.62103669	40.68622325	31.11861532	160.6868002	44.47529175	1.853023764	0.000112854	0.004523627	-	2	205697587	205699901	-	1262	-	NA	-
gene:Zm00001d039933	5.456628974	62.12340702	411.5953519	6.636111643	12.43190155	6.406773743	159.7251293	8.491595645	4.239278204	0.000113967	0.004561033	-	3	19846081	19846545	-	465	-	NA	-
gene:Zm00001d035605	1274.668528	756.6976105	1006.336176	2498.970042	7106.526994	2430.913009	1012.567438	4012.136682	-1.986402368	0.00011436	0.004569554	MYB-transcription_factor_21	6	36427345	36428954	-	1411	-	NA	Myb_DNA-binding
gene:Zm00001d037918	802.1244592	934.4395806	1128.754466	481.5921021	343.5725519	331.3217279	955.1061686	385.4954606	1.308832565	0.000114702	0.004576011	-	6	141972442	141976417	-	2050	-	NA	Glyco_hydro_1
gene:Zm00001d021949	73.11882825	56.94645643	474.250382	36.02460606	9.041382944	12.81354749	201.4385556	19.29317883	3.380563154	0.000117138	0.004665853	-	7	166838764	166841455	+	2500	-	NA	-
gene:Zm00001d030108	619.8730515	710.9678803	871.3868808	346.0258214	178.5673132	135.457502	734.0759375	220.0168789	1.738070843	0.00011737	0.004667743	JUMONJI-transcription_factor_14	1	106180425	106186974	+	5605	-	NA	JmjC
gene:Zm00001d044874	30.55712226	12.94237646	148.4442253	5.688095694	0	3.661013567	63.98124133	3.116369754	4.333624196	0.00011905	0.004727166	-	9	6096248	6097444	+	1060	-	NA	-
gene:Zm00001d034183	456.1741822	635.9020968	424.1263579	217.0956523	202.3009434	204.1015064	505.400879	207.8327007	1.28235094	0.00011991	0.004753873	-	1	285934742	285938541	+	2655	-	NA	-
gene:Zm00001d022036	1.091325795	0	0	42.66071771	14.69224728	10.06778731	0.363775265	22.4735841	-6.018843192	0.000120445	0.004767612	-	7	168372218	168373468	-	1154	-	NA	Peptidase_C1
gene:Zm00001d049377	342.6762996	836.9403446	272.790362	99.54167465	120.9284969	146.4405427	484.1356687	122.3035714	1.985352839	0.000122381	0.004836721	-	4	28211107	28236761	-	5850	-	NA	-
gene:Zm00001d034221	112.4065569	12.07955136	152.2999194	564.0694897	630.6364604	665.3892159	92.26200922	620.031722	-2.750150037	0.000122695	0.004841604	-	1	287023471	287024778	-	1308	-	NA	-
gene:Zm00001d039086	37.10507702	29.33605331	26.98985914	80.58135567	111.8871139	109.830407	31.14366316	100.7662922	-1.696429187	0.000124104	0.004889588	-	6	169733422	169738386	-	2374	-	NA	-
gene:Zm00001d022277	889.4305228	111.3044376	5200.367502	260.704386	129.9698798	69.55925778	2067.034154	153.4111745	3.752025334	0.000124427	0.004894723	-	7	174294636	174296639	+	2004	-	NA	PD40
gene:Zm00001d017801	276.1054261	117.3442133	756.6799794	68.25714833	5.65086434	2.745760176	383.3765396	25.55125762	3.904484931	0.000125397	0.004925225	-	5	207142340	207144828	+	1227	-	NA	-
gene:Zm00001d027557	4403.499582	1377.931681	8494.094241	1365.142967	508.5777906	344.1352753	4758.508501	739.2853442	2.686212045	0.000127388	0.00498875	glutathione_transferase31	1	8129042	8130156	-	1033	-	NA	-
gene:Zm00001d036158	0	0	0	9.48015949	14.69224728	18.30506784	0	14.1591582	-6.313030394	0.000127407	0.00498875	-	6	74947112	74948473	+	1362	-	NA	-
gene:Zm00001d048117	58.93159292	21.57062744	35.66517101	134.6182648	155.9638558	138.2032622	38.72246379	142.9284609	-1.891201855	0.000129264	0.005053637	-	9	150410615	150412981	-	862	-	NA	-
gene:Zm00001d022550	10.91325795	0	13.49492957	61.62103669	85.89313797	103.4236333	8.136062506	83.64593598	-3.376155661	0.000130226	0.005083438	bZIP-transcription_factor_92	7	179802619	179805281	-	1515	-	NA	bZIP_1
gene:Zm00001d012321	55.65761554	8.628250975	376.8941044	9.48015949	12.43190155	2.745760176	147.0599903	8.219273738	4.168560965	0.000131513	0.005125759	-	8	172400471	172401895	+	1425	-	NA	-
gene:Zm00001d038209	2875.643469	2603.143319	2508.129053	1381.259238	1190.07203	1346.337739	2662.30528	1305.889669	1.02747832	0.000132027	0.005137917	-	6	151715973	151720708	-	3728	-	NA	-
gene:Zm00001d028054	954.9100705	834.3518693	989.9494763	428.503209	472.4122588	419.1860535	926.4038053	440.0338404	1.07418085	0.00013227	0.005139493	-	1	21770615	21773945	+	2500	-	NA	-
gene:Zm00001d013706	560.9414585	449.5318758	803.9122329	1384.103286	1523.473026	1710.608589	604.7951891	1539.394967	-1.348012753	0.000132724	0.005149226	thylakoid_assembly_9	5	18187967	18195207	+	3150	-	NA	-
gene:Zm00001d031639	496.5532366	253.6705787	358.5795571	954.6520607	970.8184937	986.6431564	369.6011241	970.7045703	-1.394080348	0.000134632	0.005215281	-	1	197105593	197108840	+	1860	-	NA	ACT
gene:Zm00001d019078	5316.939272	1358.949529	5278.445309	1296.885818	673.5830294	458.5419493	3984.778037	809.6702657	2.299002299	0.00013498	0.005215785	-	7	15495962	15497950	-	1908	-	NA	AAA
gene:Zm00001d047779	62.20557031	212.254974	13.49492957	387.7385232	1013.765063	1018.677025	95.98515795	806.7268703	-3.069367432	0.000135056	0.005215785	-	9	141540110	141541136	-	843	-	NA	-
gene:Zm00001d053165	94.94534415	21.57062744	151.3359959	395.3226508	484.8441604	527.1859537	89.28398916	469.1175883	-2.395061456	0.000135402	0.005221203	-	4	217556068	217556547	+	480	-	NA	-
gene:Zm00001d014083	0	0	0	12.32420734	15.82242015	12.81354749	0	13.65339166	-6.259344173	0.000135975	0.005235357	-	5	31745001	31747554	-	2357	-	NA	-
gene:Zm00001d021804	258.6442134	92.32228543	690.1692551	76.78929187	19.21293876	8.237280527	347.0452513	34.74650372	3.318686295	0.0001369	0.005258966	-	7	163311408	163314632	+	2282	-	NA	Pyr_redox_2
gene:Zm00001d042143	12658.28789	18339.34745	31494.27384	7646.696645	5635.04192	2636.845022	20830.6364	5306.194529	1.972972576	0.000137003	0.005258966	glucan_endo-1%2C3-beta-glucosidase_homolog1	3	153385868	153387244	+	1287	-	NA	Glyco_hydro_17
gene:Zm00001d037243	32.73977384	26.74757802	77.11388325	142.2023924	222.644055	193.1184657	45.53374504	185.9883044	-2.030088771	0.000137821	0.005282367	-	6	117639992	117640558	+	567	-	NA	-
gene:Zm00001d007923	65.47954769	34.5130039	34.70124746	91.95754706	219.2535364	274.5760176	44.89793302	195.262367	-2.124358826	0.00013911	0.005323749	-	2	242818296	242819090	-	795	-	NA	-
gene:Zm00001d037035	321.9411095	469.376853	564.8591948	168.7468389	71.20089069	31.11861532	452.0590524	90.35544831	2.322658936	0.000139946	0.005347664	-	6	109824433	109840047	-	2884	-	NA	Ion_trans
gene:Zm00001d003283	68.75352507	44.00407997	451.116217	15.16825518	24.8638031	1.830506784	187.9579407	13.95418836	3.759668039	0.000141412	0.005395547	-	2	38745725	38747760	+	1961	-	NA	p450
gene:Zm00001d023299	109.1325795	99.22488621	137.8410663	236.0559713	325.489786	342.3047686	115.3995107	301.2835086	-1.384628699	0.000142329	0.005422398	-	10	2352030	2356262	+	3049	-	NA	-
gene:Zm00001d019734	51.29231236	25.02192783	384.6054927	16.11627113	15.82242015	5.491520351	153.639911	12.47673721	3.625976053	0.000144261	0.005487774	AP2-EREBP-transcription_factor_177	7	54535486	54536259	-	774	-	NA	AP2
gene:Zm00001d032220	2629.00384	2182.084672	1258.884144	874.070705	595.6011015	644.3383879	2023.324218	704.6700648	1.521495185	0.000145315	0.005513936	-	1	217631090	217658099	-	9782	-	NA	ChaC
gene:Zm00001d043505	689.7179023	487.4961801	268.9346679	102.3857225	167.2655845	154.6778232	482.0495834	141.4430434	1.769254442	0.000145384	0.005513936	-	3	202186627	202188359	-	834	-	NA	Hpt
gene:Zm00001d042088	575.1286939	1395.188183	1179.842414	435.1393206	205.691462	192.2032123	1050.053097	277.6779983	1.918857453	0.000145923	0.005526116	-	3	150286591	150293334	-	2944	-	NA	Pribosyltran
gene:Zm00001d015097	295.7492904	442.629275	164.8309255	109.0218341	42.94656899	65.89824421	301.0698303	72.62221578	2.049823832	0.000146417	0.005536575	-	5	75308380	75310705	+	2302	-	NA	-
gene:Zm00001d035316	81.84943461	49.18103056	32.77340038	9.48015949	10.17155581	10.9830407	54.60128852	10.21158534	2.415697724	0.00014688	0.005545829	-	6	20920294	20923478	+	1955	-	NA	-
gene:Zm00001d040291	701.7224861	1713.570644	1356.240422	430.3992409	462.240703	331.3217279	1257.17785	407.9872239	1.624131947	0.000148169	0.005586161	-	3	36013414	36017372	+	817	-	NA	-
gene:Zm00001d022073	58.93159292	54.35798114	178.325855	13.27222329	18.08276589	21.05082801	97.20514303	17.46860573	2.476310054	0.000149723	0.00563637	-	7	169489044	169492981	+	1597	-	NA	Abhydrolase_1
gene:Zm00001d040231	9.821932153	1.725650195	3.855694163	38.86865391	50.85777906	32.03386872	5.134425504	40.58676723	-3.013594808	0.000151958	0.005711828	-	3	33110293	33110631	-	339	-	NA	-
gene:Zm00001d043368	336.1283448	284.7322822	311.3473036	970.7683318	534.5717666	978.4058759	310.7359769	827.9153248	-1.41449295	0.000152177	0.005711828	TCP-transcription_factor_30	3	197856616	197857467	+	852	-	NA	TCP
gene:Zm00001d041298	104.7672763	74.20295838	120.4904426	34.12857417	7.911210076	16.47456105	99.82022576	19.50478177	2.346549051	0.000153045	0.005732284	-	3	110788361	110796970	-	4023	-	NA	Pkinase
gene:Zm00001d034270	992.0151475	265.75013	1882.542675	227.5238278	160.4845473	37.52538907	1046.769317	141.844588	2.883866692	0.000153373	0.005732284	-	1	288305209	288306599	+	823	-	NA	-
gene:Zm00001d049597	1686.098353	1966.378397	3742.915108	842.7861787	301.7561558	114.406674	2465.13062	419.6496695	2.554319819	0.0001534	0.005732284	-	4	36830553	36836546	+	4217	-	NA	Pyr_redox_2
gene:Zm00001d020717	2110.624087	492.6731307	1716.747826	4818.765069	5847.514419	7034.63757	1440.015015	5900.305686	-2.034911308	0.000154226	0.005754657	abscisic_acid_8'-hydroxylase4	7	129916943	129919846	-	1903	-	NA	p450
gene:Zm00001d032809	0	0	0	0.948015949	10.17155581	69.55925778	0	26.89294318	-7.240191607	0.000155004	0.005772621	-	1	238905615	238906310	+	696	-	NA	-
gene:Zm00001d002020	747.5581695	968.0897594	1652.164949	408.594874	285.9337356	115.3219274	1122.604293	269.950179	2.056386076	0.000155162	0.005772621	-	2	4479323	4481492	-	2052	-	NA	Pkinase_Tyr
gene:Zm00001d043056	510.740472	1166.539532	973.5627761	372.570268	224.9044007	192.2032123	883.61426	263.2259603	1.747213621	0.000155986	0.005794768	-	3	187649277	187655281	+	4917	-	NA	Pkinase_Tyr
gene:Zm00001d011510	961.4580252	831.763394	961.9956936	1784.166016	1835.400738	1935.760924	918.4057043	1851.775893	-1.011878486	0.000157156	0.005829703	-	8	152919755	152921651	+	1055	-	NA	-
gene:Zm00001d013320	653.7041511	96.63641092	227.4859556	1416.335828	1687.348092	2003.489675	325.9421725	1702.391198	-2.385901144	0.000159031	0.005890658	-	5	8625328	8628769	-	1096	-	NA	-
gene:Zm00001d052008	288.1100098	291.6348829	493.5288528	153.5785837	63.28968061	55.8304569	357.7579152	90.89957375	1.975568151	0.000160116	0.005915606	-	4	176339769	176344984	-	2546	-	NA	-
gene:Zm00001d032925	7.639280564	22.43345253	18.31454727	54.0369091	59.89916201	218.7455607	16.12909346	110.8938773	-2.775249656	0.000160301	0.005915606	-	1	243297436	243315080	-	734	-	NA	-
gene:Zm00001d014419	15.27856113	13.80520156	27.95378268	0.948015949	0	0	19.01251512	0.316005316	5.739056233	0.000160404	0.005915606	-	5	45785643	45787979	-	1683	-	NA	-
gene:Zm00001d010085	33.83109964	11.21672627	36.62909455	2.844047847	0	0.915253392	27.22564015	1.253100413	4.39409431	0.000160845	0.005923245	-	8	98804949	98806659	+	1017	-	NA	-
gene:Zm00001d052067	2.18265159	0	0	22.75238278	12.43190155	42.10165603	0.72755053	25.76198012	-5.271293257	0.000161733	0.005928719	serine-threonine_kinase3	4	178304940	178308282	-	2935	-	NA	-
gene:Zm00001d021845	273.9227745	191.5471716	180.2537021	482.5401181	495.0157162	699.2535914	215.2412161	558.9364752	-1.378042569	0.000161908	0.005928719	-	7	164384246	164384855	-	540	-	NA	-
gene:Zm00001d016308	327.3977384	316.6568108	248.6922735	611.4702871	664.5416464	691.9315643	297.5822742	655.9811659	-1.140509133	0.000161923	0.005928719	-	5	156567962	156572617	-	1362	-	NA	Ndr
gene:Zm00001d027440	13.09590954	1.725650195	7.711388325	36.97262201	55.37847054	74.13552474	7.510982686	55.4955391	-2.908844558	0.000161928	0.005928719	-	1	5422920	5423669	+	750	-	NA	-
gene:Zm00001d025509	359.0461865	42.27842978	356.6517101	1203.980255	1523.473026	1685.896748	252.6587754	1471.116676	-2.542446287	0.000162643	0.005935172	-	10	120876061	120876869	-	676	-	NA	Cupin_3
gene:Zm00001d035080	54.56628974	311.4798602	332.5536215	53.08889315	33.90518604	33.8643755	232.8665905	40.28615156	2.531175228	0.000162659	0.005935172	-	6	4036225	4036665	+	441	-	NA	-
gene:Zm00001d017820	127.685118	161.3482932	601.4882894	79.63333972	33.90518604	26.54234836	296.8405669	46.69362471	2.667523653	0.000163019	0.005935172	-	5	207733647	207736615	-	2113	-	NA	-
gene:Zm00001d044947	72.02750246	117.3442133	500.2763176	38.86865391	28.2543217	4.576266959	229.8826778	23.89974752	3.268126367	0.000163282	0.005935172	-	9	8045241	8049094	-	1464	-	NA	Lipase_3
gene:Zm00001d028582	36.01375123	29.33605331	29.88162976	6.636111643	3.390518604	2.745760176	31.74381144	4.257463474	2.892242514	0.000163474	0.005935172	-	1	39799383	39800220	-	504	-	NA	efhand
gene:Zm00001d031802	130.9590954	97.49923602	623.6585308	42.66071771	51.98795193	38.44064246	284.0389541	44.36310403	2.679695866	0.000163508	0.005935172	Helminthosporium_carbonum_susceptibility1	1	202214939	202217025	+	1465	-	NA	Epimerase
gene:Zm00001d048667	166.9728466	194.1356469	142.660684	73.94524403	49.72760619	37.52538907	167.9230592	53.73274643	1.64407799	0.000165257	0.00599008	-	4	3003539	3015421	-	9456	-	NA	-
gene:Zm00001d021788	6593.790452	7055.320822	12569.56297	3802.491972	3037.904669	2696.336492	8739.558082	3178.911044	1.459028153	0.000166011	0.006006477	-	7	162999143	163002120	+	1880	-	NA	GTP_EFTU
gene:Zm00001d018431	173.5208014	229.5114759	322.9143861	93.85357896	68.94054495	36.61013567	241.9822211	66.46808653	1.865380096	0.000166243	0.006006477	-	5	220634043	220637003	-	2785	-	NA	Pkinase_Tyr
gene:Zm00001d026154	276.1054261	452.1203511	461.719376	182.0190622	105.1060767	108.9151536	396.6483844	132.0134309	1.586815936	0.000166419	0.006006477	-	10	139926048	139927942	-	871	-	NA	GSHPx
gene:Zm00001d036715	460.5394854	816.2325422	723.9065791	302.4170877	160.4845473	118.9829409	666.8928689	193.9615253	1.78168038	0.000167617	0.006041117	-	6	98447529	98450787	-	2549	-	NA	-
gene:Zm00001d008498	391.7859603	600.5262678	867.5311866	267.3404976	141.2716085	143.6947825	619.9478049	184.1022962	1.751278791	0.000168522	0.006065109	-	8	10450076	10453191	-	1155	-	NA	-
gene:Zm00001d024543	797.759156	1341.693027	895.4849693	479.6960702	226.0345736	213.2540403	1011.645717	306.328228	1.723354466	0.000169951	0.006107872	NAC-transcription_factor_61	10	77529347	77533684	+	3094	-	NA	NAM
gene:Zm00001d028616	435.4389921	107.8531372	257.3675854	686.3635471	1400.284184	1335.354699	266.8865716	1140.667476	-2.096636514	0.000171546	0.006156493	-	1	40942152	40945320	-	1873	-	NA	-
gene:Zm00001d014687	712.635744	655.7470741	352.7960159	247.4321627	161.6147201	160.1693436	573.726278	189.7387421	1.595822898	0.000174448	0.006251792	-	5	59017351	59024982	+	5926	-	NA	NB-ARC
gene:Zm00001d013669	1568.235167	1977.595123	1791.933862	966.976268	655.5002635	682.7790303	1779.254718	768.4185206	1.21121231	0.000175019	0.006262796	-	5	16901324	16905867	-	1900	-	NA	DnaJ_C
gene:Zm00001d012731	123.3198148	62.98623212	96.39235407	223.731764	280.2828713	321.2539405	94.23280033	275.0895253	-1.548585855	0.000175653	0.006262796	ARF-transcription_factor_26	8	179454361	179460511	+	3873	-	NA	Auxin_resp
gene:Zm00001d025644	526.0190331	367.5634915	437.6212875	861.7464977	1064.622842	1146.8125	443.734604	1024.393946	-1.207571641	0.0001757	0.006262796	-	10	124859033	124862961	+	2355	-	NA	-
gene:Zm00001d040027	117.8631858	74.20295838	26.0259356	7.584127592	10.17155581	0	72.69735994	5.918561135	3.635498444	0.000175742	0.006262796	-	3	23377488	23378234	-	663	-	NA	-
gene:Zm00001d021634	730.0969567	345.9928641	996.6969411	1866.643404	2223.050031	2697.251746	690.9289206	2262.31506	-1.711471844	0.00017603	0.006264236	-	7	158645403	158646190	+	673	-	NA	-
gene:Zm00001d051733	33.83109964	15.53085175	25.06201206	82.47738757	109.6267682	82.37280527	24.80798782	91.49232035	-1.889950721	0.000176688	0.006278853	-	4	168461546	168477601	+	1313	-	NA	-
gene:Zm00001d017912	949.4534415	2430.5783	1023.6868	547.9532185	376.3475651	268.1692438	1467.90618	397.4900091	1.884975246	0.000177262	0.006290454	-	5	210036826	210039426	+	1323	-	NA	LAG1
gene:Zm00001d048165	3500.97315	2040.581356	2586.20686	1114.866756	1169.728918	1146.8125	2709.253788	1143.802725	1.2439384	0.000178726	0.006333551	-	9	151240881	151242302	+	1044	-	NA	-
gene:Zm00001d002979	372.142096	183.7817458	838.6134804	141.2543764	62.15950774	35.69488228	464.8457741	79.70292214	2.543542074	0.000180367	0.006382782	-	2	28743892	28747973	-	2433	-	NA	Pkinase
gene:Zm00001d031617	1260.481293	1069.040296	974.5266996	572.6016332	482.5838147	410.948773	1101.349429	488.7114069	1.172124689	0.00018092	0.006393426	sulfite_oxidase1	1	196224574	196228047	+	1762	-	NA	-
gene:Zm00001d037681	1856.345177	77.65425877	561.0035007	136.5142967	75.72158216	59.49147047	831.6676455	90.5757831	3.198343023	0.000182625	0.006436862	-	6	133851119	133853351	-	1020	-	NA	-
gene:Zm00001d014135	4.365303179	0	4.819617703	45.50476555	25.99397597	32.94912211	3.061640294	34.81595454	-3.540912851	0.000182656	0.006436862	-	5	33669397	33672106	+	2628	-	NA	-
gene:Zm00001d012749	400.5165667	288.1835826	498.3484705	168.7468389	152.5733372	134.5422486	395.6828733	151.9541416	1.380482539	0.000183289	0.006450188	heat_shock_transcription_factor2	8	179671303	179673854	-	2014	-	NA	HSF_DNA-bind
gene:Zm00001d002008	22.91784169	40.55277958	15.42277665	0	0	2.745760176	26.29779931	0.915253392	4.775572182	0.000184523	0.00648464	-	2	4300206	4300844	-	553	-	NA	-
gene:Zm00001d005983	70.93617666	16.39367685	43.37655933	5.688095694	0	0	43.56880428	1.896031898	4.49316365	0.000187032	0.006563717	-	2	194678094	194679159	-	1066	-	NA	-
gene:Zm00001d031992	775.9326401	264.0244798	372.0744867	1203.980255	1648.922215	2274.404679	470.6772022	1709.102383	-1.861178399	0.000189374	0.006636705	indeterminate_domain_p1	1	208942917	208950782	+	2744	-	NA	-
gene:Zm00001d043898	10.91325795	20.70780234	196.6404023	6.636111643	4.520691472	0.915253392	76.0871542	4.024018836	4.246702448	0.000192743	0.006745459	-	3	213265745	213266609	-	703	-	NA	-
gene:Zm00001d029823	4.365303179	0	5.783541244	18.01230303	63.28968061	48.50842977	3.382948141	43.2701378	-3.699767133	0.000195075	0.006817684	-	1	88801806	88802468	+	663	-	NA	-
gene:Zm00001d049250	40.37905441	68.1631827	17.35062373	2.844047847	0	6.406773743	41.96428695	3.083607197	3.730920641	0.000195723	0.006830917	-	4	22858123	22862808	-	1155	-	NA	Pkinase
gene:Zm00001d030993	104.7672763	20.70780234	73.25818909	184.8631101	393.3001581	412.7792797	66.24442258	330.3141826	-2.321486233	0.000196129	0.006835696	Aux/IAA-transcription_factor_2	1	172413967	172415265	+	1145	-	NA	-
gene:Zm00001d014774	4.365303179	2.588475292	2.891770622	24.64841468	31.64484031	23.79658819	3.281849698	26.69661439	-3.037348705	0.00019854	0.006910228	-	5	62765407	62765844	-	438	-	NA	Auxin_inducible
gene:Zm00001d032618	16.36988692	6.039775682	64.58287723	338.4416938	401.2113682	67.728751	28.99751328	269.127271	-3.214664118	0.000199019	0.006915322	-	1	232257002	232258146	-	1048	-	NA	-
gene:Zm00001d043257	136.4157244	556.5221879	133.9853722	57.82897289	55.37847054	49.42368316	275.6410948	54.21037553	2.347397074	0.000199231	0.006915322	-	3	193492376	193497031	-	3229	-	NA	B_lectin
gene:Zm00001d022542	1312.864931	1541.005624	1324.430945	751.7766476	632.8968061	552.8130487	1392.767167	645.8288341	1.108840473	0.000199758	0.006924134	bZIP-transcription_factor_54	7	179748248	179754088	-	2624	-	NA	-
gene:Zm00001d006454	205.1692494	71.61448309	148.4442253	612.4183031	351.483762	523.5249402	141.7426526	495.8090017	-1.808928553	0.000201646	0.006980026	-	2	208726723	208733569	+	3281	-	NA	-
gene:Zm00001d026094	113.4978827	34.5130039	200.4960965	17.06428708	22.60345736	20.13557462	116.1689943	19.93443969	2.543595227	0.000202603	0.007003603	HSF-transcription_factor_20	10	138304690	138305939	-	1173	-	NA	HSF_DNA-bind
gene:Zm00001d046679	159.333566	104.4018368	122.4182897	308.1051834	475.8027775	284.6438049	128.7178975	356.1839219	-1.469183685	0.000206939	0.007143772	-	9	102103783	102108470	+	2993	-	NA	K_trans
gene:Zm00001d049061	140.7810275	35.375829	231.3416498	33.18055822	11.30172868	8.237280527	135.8328354	17.57318914	2.947067591	0.000207292	0.007146213	-	4	14493118	14493396	-	279	-	NA	-
gene:Zm00001d014903	354.6808833	652.2957737	428.9459756	206.6674769	101.7155581	64.06773743	478.6408775	124.1502575	1.946888364	0.000209776	0.007222048	phospholipase_C1	5	67438945	67442847	-	3063	-	NA	PI-PLC-X
gene:Zm00001d010822	234.6350459	111.3044376	246.7644264	416.1790016	749.3046115	784.3721568	197.56797	649.9519233	-1.718942124	0.000210457	0.007235684	-	8	128819168	128821322	+	1181	-	NA	-
gene:Zm00001d030176	15.27856113	3.45130039	63.61895369	0	1.130172868	0	27.44960507	0.376724289	6.268473915	0.000211222	0.007252151	-	1	110660706	110660888	+	183	-	NA	-
gene:Zm00001d031626	5.456628974	0	0.963923541	22.75238278	27.12414883	47.59317638	2.140184172	32.48990266	-3.991974671	0.000215259	0.007380757	-	1	196844056	196844904	+	601	-	NA	-
gene:Zm00001d024027	4386.038369	1380.520156	1438.173923	12033.16644	8774.662148	7309.213587	2401.577483	9372.347392	-1.964576191	0.000215895	0.007392592	proline_rich_cell_wall_protein1	10	37879487	37880623	-	1137	-	NA	-
gene:Zm00001d047223	86.21473779	11.21672627	4.819617703	251.2242265	327.7501317	324.9149541	34.08369392	301.2964375	-3.150924916	0.000219533	0.007503141	-	9	122804526	122807662	-	1454	-	NA	Peptidase_S10
gene:Zm00001d011133	719.1836988	81.96838426	1040.0735	94.8015949	96.06469379	91.52533919	613.7418612	94.13054263	2.704729097	0.000219715	0.007503141	WRKY-transcription_factor_68	8	140010389	140011159	-	591	-	NA	WRKY
gene:Zm00001d044394	185.5253851	128.5609395	115.6708249	281.5607369	583.1691999	419.1860535	143.2523832	427.9719968	-1.579577842	0.000222777	0.007597458	-	3	227051751	227054558	+	2808	-	NA	-
gene:Zm00001d037308	34.92242543	63.84905721	71.33034201	142.2023924	245.2475124	172.9828911	56.70060822	186.8109319	-1.715922037	0.000223863	0.00762426	-	6	120272311	120275387	-	2351	-	NA	DUF6
gene:Zm00001d007175	14.18723533	2.588475292	15.42277665	65.41310048	47.46726046	86.94907223	10.73282909	66.60981106	-2.648198715	0.000227785	0.007747429	-	2	223829103	223831634	-	2402	-	NA	-
gene:Zm00001d007050	58.93159292	92.32228543	107.9594366	19.90833493	28.2543217	24.71184158	86.4044383	24.2914994	1.835172392	0.000233845	0.00793704	-	2	220882228	220886249	-	1957	-	NA	PP2C
gene:Zm00001d033878	13.09590954	0.862825097	99.28412469	0	1.130172868	0	37.74761978	0.376724289	6.728451495	0.000233985	0.00793704	-	1	277214464	277217303	+	2569	-	NA	ACT
gene:Zm00001d009524	0	0	0	5.688095694	25.99397597	11.89829409	0	14.52678858	-6.345716957	0.000236685	0.008017892	-	8	68938921	68946401	+	1917	-	NA	-
gene:Zm00001d004437	248.8222812	100.0877113	320.986539	534.6809953	931.2624433	1009.524491	223.2988439	825.1559766	-1.886433804	0.000240713	0.008143485	-	2	111722006	111723284	+	1093	-	NA	Thaumatin
gene:Zm00001d017138	96.03666995	84.55685955	86.75311866	214.2516045	223.7742279	189.4574521	89.11554939	209.1610948	-1.23136351	0.000241753	0.00816778	-	5	186660341	186666947	+	1755	-	NA	HLH
gene:Zm00001d051149	19.64386431	4.314125487	67.47464785	0	1.130172868	0.915253392	30.47754588	0.681808753	5.512788492	0.000243876	0.008228555	myb_transcription_factor39	4	145959279	145960656	-	1096	-	NA	Myb_DNA-binding
gene:Zm00001d043921	10.91325795	44.86690507	33.73732392	2.844047847	3.390518604	1.830506784	29.83916231	2.688357745	3.489299357	0.000245063	0.008257619	NAC-transcription_factor_82	3	213845082	213849487	+	1824	-	NA	NAM
gene:Zm00001d029101	0	0	0	31.28452632	3.390518604	13.72880088	0	16.13461527	-6.504516814	0.000245997	0.008278099	-	1	58046732	58047412	-	596	-	NA	-
gene:Zm00001d031325	25.10049328	17.25650195	126.2739838	4.740079745	3.390518604	7.322027135	56.21032635	5.150875161	3.438309226	0.000246599	0.00828737	-	1	186052724	186053956	-	1129	-	NA	-
gene:Zm00001d004389	56.74894133	42.27842978	46.26832995	144.0984243	144.6621271	110.7456604	48.43190035	133.1687373	-1.461365557	0.000248288	0.008333098	-	2	108158838	108160344	+	1349	-	NA	FMO-like
gene:Zm00001d011751	12.00458374	9.491076072	130.129678	3.792063796	0	0	50.54177927	1.264021265	5.293740064	0.000250267	0.008388411	-	8	160749792	160750217	-	426	-	NA	-
gene:Zm00001d020498	0	0	0	19.90833493	10.17155581	9.152533919	0	13.07747489	-6.199287534	0.000252023	0.008436116	-	7	119318932	119324220	-	2085	-	NA	-
gene:Zm00001d026606	2539.515125	1675.606339	2925.507946	6325.162412	4684.566538	6774.705607	2380.209803	5928.144852	-1.316612921	0.000254854	0.008519645	-	10	148901809	148903746	+	1775	-	NA	DnaJ
gene:Zm00001d043740	27.28314487	8.628250975	243.8726558	6.636111643	4.520691472	7.322027135	93.26135055	6.159610084	3.915693679	0.000257659	0.008602095	-	3	208800675	208802444	+	1455	-	NA	Pkinase
gene:Zm00001d006158	945.0881383	155.3085175	557.1478065	11.37619139	0	0	552.5148208	3.792063796	7.180406481	0.000259272	0.008644559	-	2	200053666	200054876	-	1109	-	NA	-
gene:Zm00001d025333	407.0645215	223.4717002	864.639416	145.9944562	129.9698798	60.40672386	498.3918792	112.1236866	2.152805424	0.000260663	0.008679526	-	10	114461652	114462911	+	1260	-	NA	-
gene:Zm00001d008457	1513.668877	825.7236183	1447.813158	451.2555917	583.1691999	400.8809856	1262.401885	478.4352591	1.399981851	0.000263083	0.008748638	-	8	9218920	9221936	+	2364	-	NA	Pkinase_Tyr
gene:Zm00001d043491	644.9735447	258.8475292	1696.505432	222.783748	136.750917	46.67792299	866.7755019	135.404196	2.678538231	0.000265006	0.008799357	AP2-EREBP-transcription_factor_134	3	201681540	201682688	+	1149	-	NA	AP2
gene:Zm00001d019957	14.18723533	13.80520156	6.747464785	51.19286125	46.33708759	55.8304569	11.57996723	51.12013525	-2.144245908	0.000265302	0.008799357	-	7	80232185	80242102	-	1989	-	NA	AMP-binding
gene:Zm00001d007661	846.8688168	768.7771619	1009.227947	423.7631292	379.7380837	437.4911213	874.9579752	413.6641114	1.080376533	0.000268489	0.00889345	-	2	237091675	237098914	-	2621	-	NA	-
gene:Zm00001d008179	0	0	0	8.532143541	19.21293876	10.9830407	0	12.90937433	-6.176472362	0.00026948	0.008914615	-	8	563764	569489	-	5012	-	NA	-
gene:Zm00001d009619	772.6586627	577.2299902	1266.595532	308.1051834	187.6086961	54.91520351	872.1613951	183.5430277	2.24868999	0.000273434	0.009031681	WRKY-transcription_factor_106	8	73563517	73564793	+	1149	-	NA	WRKY
gene:Zm00001d044717	383.055354	110.4416125	375.9301809	711.0119618	1299.698798	1438.778332	289.8090491	1149.829697	-1.989010536	0.00027373	0.009031681	-	9	59301	67031	-	3085	-	NA	Ion_trans
gene:Zm00001d017240	1555.139258	2706.682331	3989.679535	1057.985799	956.1262464	806.3382382	2750.500374	940.1500946	1.548832229	0.00027447	0.009044311	-	5	190054668	190058017	+	655	-	NA	-
gene:Zm00001d007877	22.91784169	144.0917913	155.1916901	21.80436683	10.17155581	15.55930766	107.400441	15.84507677	2.758070318	0.000275481	0.009065863	-	2	241567182	241571836	-	1041	-	NA	-
gene:Zm00001d029163	2.18265159	0	0	20.85635088	15.82242015	27.45760176	0.72755053	21.37879093	-5.004041034	0.000276512	0.009088003	-	1	60869629	60871045	+	996	-	NA	-
gene:Zm00001d034172	176.7947788	139.7776658	92.53665991	52.1408772	37.29570465	21.9660814	136.3697015	37.13422108	1.876945559	0.000281295	0.009233261	-	1	285664115	285665964	-	993	-	NA	-
gene:Zm00001d011451	222.6304621	23.29627763	397.1364988	18.01230303	27.12414883	34.77962889	214.3544128	26.63869359	3.007711284	0.000282888	0.009273527	-	8	150860389	150861180	+	792	-	NA	-
gene:Zm00001d043360	31.64844805	18.98215214	1.927847081	0	0	0	17.51948243	0	6.58112376	0.000285434	0.009344913	-	3	197670387	197686901	-	1110	-	NA	-
gene:Zm00001d029468	9.821932153	7.765425877	48.19617703	0	1.130172868	0	21.92784502	0.376724289	5.945080007	0.000287522	0.009401156	-	1	72028770	72032820	-	1753	-	NA	-
gene:Zm00001d019754	2062.605752	2289.937809	2784.775109	1233.36875	1150.51598	1018.677025	2379.106223	1134.187252	1.068843013	0.000289247	0.009445397	-	7	56516523	56522809	-	5675	-	NA	adh_short
gene:Zm00001d024872	5.456628974	6.039775682	3.855694163	29.38849442	29.38449457	33.8643755	5.117366273	30.8791215	-2.591467045	0.000289813	0.009451706	-	10	91598678	91600142	-	1114	-	NA	Thaumatin
gene:Zm00001d001935	413.6124762	999.1514629	695.9527964	294.8329602	175.1767945	213.2540403	702.9055785	227.7545983	1.625728379	0.000291701	0.009496036	-	2	3107291	3112383	+	3735	-	NA	-
gene:Zm00001d030148	901.4351065	1546.182575	1533.602353	650.338941	411.382924	335.8979948	1327.073345	465.8732866	1.51030552	0.000292174	0.009496036	-	1	108714459	108717659	+	1708	-	NA	-
gene:Zm00001d006857	13.09590954	18.11932705	18.31454727	0.948015949	0	0	16.50992795	0.316005316	5.537024713	0.000292295	0.009496036	-	2	217982798	217992480	-	2887	-	NA	-
gene:Zm00001d025864	45.83568338	55.22080624	195.6764788	21.80436683	15.82242015	12.81354749	98.91098946	16.81344482	2.556653689	0.000301401	0.009779339	MYB-transcription_factor_132	10	131914989	131917182	-	1680	-	NA	Myb_DNA-binding
gene:Zm00001d024213	79.66678302	20.70780234	55.90756536	175.3829506	212.4724992	214.1692937	52.09405024	200.6749145	-1.951058689	0.000302804	0.009812318	-	10	56996605	56997874	-	1054	-	NA	-
gene:Zm00001d052648	216.0825074	1256.273342	422.1985108	157.3706475	106.2362496	129.9659816	631.51812	131.1909596	2.267213606	0.000307022	0.009936297	MADS-transcription_factor_52	4	195797119	195798103	-	679	-	NA	-
gene:Zm00001d031934	106.9499279	207.9408485	69.40249493	3.792063796	6.781037208	36.61013567	128.0977571	15.72774556	3.018158324	0.000309126	0.009991646	-	1	207282233	207283474	-	1154	-	NA	-
gene:Zm00001d013228	32.73977384	82.83120936	14.45885311	4.740079745	2.260345736	6.406773743	43.34327877	4.469066408	3.264822968	0.000311509	0.010055887	-	5	6770365	6773482	+	2515	-	NA	-
gene:Zm00001d051749	741.0102147	191.5471716	474.250382	1151.839378	2097.600843	2143.523444	468.9359228	1797.654555	-1.939276808	0.000317556	0.010238056	Homeobox-transcription_factor_115	4	168776069	168778157	+	1740	-	NA	HALZ
gene:Zm00001d006461	315.3931547	613.4686443	310.3833801	177.2789825	115.2776325	118.0676876	413.0817264	136.8747675	1.593644878	0.000322382	0.010380464	-	2	208886176	208891521	-	2453	-	NA	-
gene:Zm00001d052392	40.37905441	32.7873537	32.77340038	107.1258022	309.6673658	75.96603153	35.3132695	164.2530665	-2.216863647	0.000323106	0.010390589	-	4	188988474	188990386	-	1795	-	NA	-
gene:Zm00001d054073	15.27856113	16.39367685	6.747464785	0	0	0	12.80656759	0	6.131033278	0.000325949	0.010468727	-	4	245933923	245948060	-	4368	-	NA	-
gene:Zm00001d049954	5872.424102	5782.653803	15298.43051	3632.797117	1375.42038	1058.948174	8984.502807	2022.388557	2.151337798	0.000327123	0.010493151	-	4	55307251	55311651	-	1733	-	NA	Pyr_redox_2
gene:Zm00001d003398	232.4523943	203.626723	202.4239435	384.8944753	733.4821914	510.7113927	212.8343536	543.0293531	-1.351072499	0.000331168	0.01060951	floury_endosperm1	2	43019871	43020779	-	909	-	NA	-
gene:Zm00001d034541	9.821932153	0	2.891770622	14.22023924	53.1181248	132.7117418	4.237900925	66.68336862	-4.007572239	0.000335618	0.010738498	-	1	295914259	295916268	+	849	-	NA	Rubredoxin
gene:Zm00001d008244	1578.057099	2361.552292	2017.491971	1034.2854	838.5882681	825.5585595	1985.700454	899.4774093	1.142568771	0.000339843	0.010860004	-	8	2452376	2459944	-	2028	-	NA	-
gene:Zm00001d021835	2248.131137	2078.54566	2324.98358	1228.62867	1140.344424	1079.999002	2217.220126	1149.657365	0.947516887	0.000343469	0.010946351	-	7	164162976	164166758	-	2885	-	NA	Pkinase
gene:Zm00001d000458	0	0	0.963923541	12.32420734	22.60345736	13.72880088	0.321307847	16.21882186	-5.544085691	0.000343625	0.010946351	OVATE-transcription_factor_3	B73V4_ctg119	9942	10808	+	867	-	NA	-
gene:Zm00001d002446	721.3663504	918.9087288	507.9877059	1653.339815	1575.460978	1887.252494	716.087595	1705.351096	-1.251706513	0.00034384	0.010946351	-	2	12874323	12877241	+	2648	-	NA	Pkinase
gene:Zm00001d038914	260.826865	363.249366	409.6675048	149.7865199	135.6207442	149.1863029	344.5812453	144.8645223	1.250266953	0.000345559	0.010987306	-	6	166871193	166875978	+	3569	-	NA	LSM
gene:Zm00001d010700	36.01375123	193.2728218	98.32020115	15.16825518	22.60345736	22.8813348	109.2022581	20.21768245	2.436725437	0.000346545	0.011004866	-	8	124961672	124970124	+	2812	-	NA	B_lectin
gene:Zm00001d047276	29.46579646	6.90260078	7.711388325	71.10119618	91.54400231	73.22027135	14.69326186	78.62182328	-2.435748642	0.000346986	0.011005088	brittle_stalk2	9	125270207	125272239	+	1818	-	NA	-
gene:Zm00001d037221	52.38363815	20.70780234	42.41263579	96.6976268	169.5259302	148.2710495	38.50135876	138.1648688	-1.848453068	0.000348267	0.011031942	TCP-transcription_factor_10	6	116436142	116437281	+	1140	-	NA	TCP
gene:Zm00001d036726	36.01375123	2.588475292	158.0834607	0.948015949	5.65086434	0	65.56189573	2.199626763	4.94194428	0.000349883	0.011069303	WRKY-transcription_factor_114	6	99175591	99177057	+	1304	-	NA	WRKY
gene:Zm00001d042540	16.36988692	99.22488621	60.72718306	0	7.911210076	6.406773743	58.7739854	4.772661273	3.637125926	0.00035219	0.011113512	-	3	171277704	171281453	+	3185	-	NA	Lipoxygenase
gene:Zm00001d052962	389.6033088	119.0698635	741.2572028	111.865882	76.85175503	30.20336193	416.6434583	72.97366632	2.513678438	0.000352446	0.011113512	-	4	206380174	206382649	+	1006	-	NA	-
gene:Zm00001d024500	138.5983759	37.10147919	99.28412469	227.5238278	353.7441077	576.6096369	91.66132661	385.9591908	-2.076892828	0.000352594	0.011113512	-	10	74401074	74401841	+	768	-	NA	-
gene:Zm00001d053799	40.37905441	20.70780234	26.0259356	4.740079745	4.520691472	1.830506784	29.03759745	3.697092667	2.98204752	0.000353524	0.011128998	-	4	241325593	241338982	+	4839	-	NA	-
gene:Zm00001d051908	4775.641678	6403.887874	2494.634123	9598.661484	16992.14907	15328.66381	4558.054558	13973.15812	-1.616135627	0.000357931	0.011243063	-	4	174319008	174320624	-	1252	-	NA	CBS
gene:Zm00001d002000	9006.711785	4970.735387	7031.822229	3313.315742	2864.988221	2743.929669	7003.0898	2974.077877	1.235488128	0.000358321	0.011243063	lipoxygenase6	2	4150293	4154404	+	3670	-	NA	Lipoxygenase
gene:Zm00001d034143	747.5581695	206.2151983	452.0801406	829.5139554	2702.243328	2724.709348	468.6178361	2085.488877	-2.154380277	0.000358477	0.011243063	GNAT-transcription_factor_6	1	285008208	285010916	+	2106	-	NA	Acetyltransf_1
gene:Zm00001d027221	10.91325795	5.176950585	5.783541244	29.38849442	29.38449457	86.03381884	7.291249926	48.26893594	-2.742144763	0.000360154	0.01128172	-	9	155532653	155535176	-	663	-	NA	-
gene:Zm00001d002369	512.9231236	682.4946521	551.3642653	265.4444657	237.3363023	298.3726058	582.2606803	267.0511246	1.124333994	0.000361479	0.011309242	-	2	11162219	11166257	+	1655	-	NA	PP2C
gene:Zm00001d007935	12.00458374	0	10.60315895	46.4527815	114.1474597	60.40672386	7.53591423	73.66898835	-3.304958945	0.000364599	0.011387547	-	2	243395122	243395787	-	666	-	NA	-
gene:Zm00001d007202	288.1100098	726.4987321	510.8794766	210.4595407	107.3664225	149.1863029	508.4960728	155.6707553	1.707296231	0.000365284	0.011387547	-	2	224615447	224646665	+	5974	-	NA	AAA
gene:Zm00001d002392	0	1.725650195	0	19.90833493	14.69224728	24.71184158	0.575216732	19.77080793	-4.989881223	0.000365328	0.011387547	-	2	11811593	11814809	+	1358	-	NA	-
gene:Zm00001d038712	7.639280564	7.765425877	25.06201206	0	0	0	13.48890617	0	6.206124235	0.000369374	0.011499543	-	6	163221629	163222424	+	796	-	NA	-
gene:Zm00001d014665	209.5345526	174.2906697	145.5524546	72.04921213	61.02933488	75.96603153	176.4592256	69.68152618	1.338143846	0.000373811	0.011623412	-	5	58158672	58165705	+	4641	-	NA	Peptidase_S8
gene:Zm00001d021726	499.827214	427.0984233	1928.811005	262.6004179	172.9164488	56.7457103	951.9122141	164.0875257	2.536614166	0.000374633	0.011634725	-	7	161509716	161514515	-	3261	-	NA	B_lectin
gene:Zm00001d008976	190.9820141	456.4344766	466.5389937	134.6182648	123.1888426	100.6778731	371.3184948	119.4949935	1.636719352	0.000376638	0.011682696	-	8	28094117	28096573	-	1367	-	NA	-
gene:Zm00001d029559	120.0458374	125.1096391	95.42843053	247.4321627	263.3302783	258.1014565	113.527969	256.2879658	-1.174432957	0.000377173	0.011684991	-	1	76180529	76181281	-	753	-	NA	-
gene:Zm00001d049127	162.6075434	206.2151983	359.5434807	96.6976268	70.07071782	70.47451117	242.7887408	79.08095193	1.617989773	0.000381607	0.011807943	-	4	16940880	16942236	-	1357	-	NA	Metallophos
gene:Zm00001d032175	222.6304621	47.45538036	174.4701609	472.1119426	661.1511278	642.5078811	148.1853345	591.9236505	-1.99980954	0.000385554	0.011905121	ZF-HD-transcription_factor_5	1	215598100	215599221	+	1122	-	NA	ZF-HD_dimer
gene:Zm00001d038523	27.28314487	2.588475292	16.38670019	0	0	0	15.41944012	0	6.394596633	0.000385686	0.011905121	-	6	159196375	159197314	-	683	-	NA	-
gene:Zm00001d044908	542.38892	786.0336638	5269.769997	517.6167082	163.8750659	84.20331205	2199.397527	255.2316954	3.107087889	0.000387682	0.011952047	12-oxo-phytodienoic_acid_reductase1	9	6927730	6929377	-	1555	-	NA	Oxidored_FMN
gene:Zm00001d048950	6021.935736	17938.9966	28755.76707	4312.524552	4579.460461	981.1516361	17572.23313	3291.04555	2.416723449	0.000388148	0.011952047	GRMZM2G117942	4	10553796	10554681	+	791	-	NA	-
gene:Zm00001d047944	84.0320862	37.96430429	121.4543661	273.9766093	332.2708232	230.6438548	81.15025221	278.9637624	-1.782889953	0.000389496	0.011974427	-	9	145916111	145916869	+	759	-	NA	-
gene:Zm00001d045393	688.6265765	203.626723	599.5604423	185.811126	105.1060767	97.93211293	497.2712473	129.6164386	1.938840307	0.000389819	0.011974427	-	9	20521786	20527702	+	1145	-	NA	zf-RanBP
gene:Zm00001d014596	318.6671321	133.7378901	108.9233601	558.381394	698.4468325	597.6604649	187.1094608	618.1628971	-1.725754468	0.000393224	0.012064405	-	5	54665517	54667625	-	1789	-	NA	Lipase_GDSL
gene:Zm00001d001276	20.7351901	44.00407997	24.09808852	4.740079745	2.260345736	4.576266959	29.61245286	3.85889748	2.927564829	0.000396779	0.012158771	-	7	170932849	170933167	-	319	-	NA	-
gene:Zm00001d038494	162.6075434	303.7144343	60.72718306	807.7095886	635.1571519	661.7282023	175.6830536	701.5316476	-1.996594043	0.000397653	0.012170869	-	6	158547372	158556691	+	4643	-	NA	-
gene:Zm00001d052819	2.18265159	0	6.747464785	29.38849442	33.90518604	36.61013567	2.976705458	33.30127205	-3.497871852	0.000400385	0.012239726	-	4	201961773	201962576	+	804	-	NA	-
gene:Zm00001d041719	1539.860697	2452.148927	2938.038952	1136.671123	696.1864867	795.3551975	2310.016192	876.0709357	1.398705654	0.000401586	0.012246879	-	3	134955964	134966224	+	3035	-	NA	HATPase_c
gene:Zm00001d005818	2488.222812	2496.153007	2434.870864	1420.127892	1253.361711	1101.04983	2473.082228	1258.179811	0.974995866	0.000401937	0.012246879	-	2	189658754	189670074	-	7787	-	NA	-
gene:Zm00001d006315	521.6537299	447.8062256	645.8287723	245.5361308	216.9931907	264.5082303	538.4295759	242.3458506	1.15097029	0.000402067	0.012246879	-	2	204313242	204316524	-	2230	-	NA	-
gene:Zm00001d018210	14.18723533	8.628250975	8.675311866	23.70039873	76.85175503	71.38976457	10.49693272	57.31397277	-2.454909111	0.00040313	0.012250282	-	5	216621754	216622970	-	1142	-	NA	-
gene:Zm00001d017121	852.3254458	1480.607867	3325.536215	516.6686922	289.3242542	45.76266959	1886.156509	283.9185387	2.732045884	0.000403145	0.012250282	glyceraldehyde-3-phosphate_dehydrogenase4	5	186104976	186109690	+	2103	-	NA	-
gene:ENSRNA049463813	18.55253851	7.765425877	10.60315895	0	0	0	12.30704111	0	6.070069	0.000407631	0.012371805	U1	5	3433111	3433271	+	161	-	NA	-
gene:Zm00001d032091	0	0	0	16.11627113	10.17155581	9.152533919	0	11.81345362	-6.052249484	0.000410519	0.012444553	-	1	212248940	212249338	-	399	-	NA	Auxin_inducible
gene:Zm00001d007485	518.3797525	2821.438069	833.7938627	381.1024115	306.2768472	190.3727055	1391.203895	292.5839881	2.249738415	0.000411314	0.012453771	-	2	232774838	232777828	-	2991	-	NA	LRRNT_2
gene:Zm00001d052767	659.1607801	410.7047464	1780.36678	328.9615343	165.0052387	115.3219274	950.0774354	203.0962335	2.225682282	0.000412308	0.012458727	-	4	200049293	200052657	-	1666	-	NA	-
gene:Zm00001d013629	1.091325795	5.176950585	3.855694163	20.85635088	41.81639612	24.71184158	3.374656847	29.12819619	-3.077710598	0.000412459	0.012458727	-	5	15856539	15859170	+	1939	-	NA	p450
gene:Zm00001d024681	12.00458374	6.90260078	18.31454727	38.86865391	56.5086434	83.28805866	12.40724393	59.55511866	-2.268720964	0.000413479	0.012474682	-	10	83531295	83535827	+	4533	-	NA	NB-ARC
gene:Zm00001d022851	16.36988692	5.176950585	6.747464785	31.28452632	51.98795193	79.62704509	9.431434097	54.29984111	-2.543199233	0.00041567	0.012525895	-	1	167269075	167269714	+	640	-	NA	-
gene:Zm00001d025727	17.46121272	6.90260078	22.17024144	52.1408772	90.41382944	66.81349761	15.51135164	69.78940142	-2.17583075	0.000416794	0.01254487	bHLH-transcription_factor_133	10	127668399	127678365	-	4242	-	NA	-
gene:Zm00001d000682	16.36988692	30.19887841	1.927847081	0	0	0	16.16553747	0	6.468699944	0.00041768	0.01255664	-	3	197779220	197789570	-	790	-	NA	-
gene:Zm00001d022551	559.8501327	201.0382477	176.3980079	709.1159299	1289.527242	1725.252644	312.4287961	1241.298605	-1.99117466	0.000419722	0.012603086	-	7	179884675	179890140	+	3571	-	NA	-
gene:Zm00001d012322	4191.782378	1581.558404	11088.97641	252.1722424	30.51466744	0.915253392	5620.772398	94.53405443	5.893525961	0.000420385	0.012608068	-	8	172403401	172405359	-	1846	-	NA	p450
gene:Zm00001d020968	265.1921681	10.35390117	263.1511266	23.70039873	18.08276589	17.38981445	179.565732	19.72432635	3.185274569	0.000421743	0.012633856	-	7	138172661	138173344	+	684	-	NA	-
gene:Zm00001d019758	70.93617666	94.04793563	720.0508849	6.636111643	0	0	295.0116657	2.212037214	7.049065849	0.000422849	0.012652065	chlorophyllase1	7	56865812	56867212	-	1258	-	NA	-
gene:Zm00001d014369	0	4.314125487	1.927847081	18.96031898	36.16553178	23.79658819	2.080657523	26.30747965	-3.604376403	0.000423678	0.012661939	-	5	43356671	43378843	+	1471	-	NA	-
gene:Zm00001d041174	213.8998558	61.26058192	78.0778068	296.7289921	533.4415937	576.6096369	117.7460815	468.9267409	-1.996264465	0.000428302	0.012779536	-	3	102147008	102147454	+	447	-	NA	-
gene:Zm00001d044650	85.123412	78.51708387	170.6144667	40.76468581	15.82242015	23.79658819	111.4183209	26.79456472	2.05114093	0.000428887	0.012779536	-	3	234077205	234079099	+	631	-	NA	-
gene:Zm00001d048263	89.48871518	54.35798114	456.8997583	29.38849442	25.99397597	1.830506784	200.2488182	19.07099239	3.395810106	0.000429124	0.012779536	ZIM-transcription_factor_4	9	153418013	153418531	-	519	-	NA	Zim
gene:Zm00001d006898	18.55253851	24.15910273	33.73732392	3.792063796	0	0	25.48298839	1.264021265	4.298821396	0.000431181	0.012825747	-	2	218943746	218943982	-	237	-	NA	-
gene:Zm00001d012744	100.4019731	58.67210663	146.5163782	26.54444657	25.99397597	32.03386872	101.863486	28.19076375	1.850804158	0.00043297	0.012863866	-	8	179565860	179569311	-	2583	-	NA	-
gene:Zm00001d014585	928.7182514	861.9622724	1508.540341	495.8123414	461.1105302	408.2030128	1099.740288	455.0419614	1.27314535	0.000435429	0.012921796	-	5	54417308	54420401	+	2369	-	NA	-
gene:Zm00001d029777	8.730606359	0	8.675311866	72.04921213	83.63279224	24.71184158	5.801972742	60.13128198	-3.391107661	0.000441381	0.013083138	-	1	86480374	86481381	+	1008	-	NA	-
gene:Zm00001d036676	1.091325795	15.53085175	67.47464785	0.948015949	0	0	28.03227513	0.316005316	6.30028725	0.000442495	0.013099891	-	6	97378208	97378813	-	606	-	NA	-
gene:Zm00001d013627	397.2425893	402.9393205	514.7351707	231.3158916	175.1767945	179.3896648	438.3056935	195.294117	1.165854149	0.000443532	0.013099891	-	5	15749312	15754431	+	2796	-	NA	-
gene:Zm00001d043663	30.55712226	14.66802666	112.7790543	5.688095694	6.781037208	5.491520351	52.66806772	5.986884418	3.139961753	0.000443752	0.013099891	WRKY-transcription_factor_73	3	206352165	206353102	+	636	-	NA	WRKY
gene:Zm00001d044293	0	0	0.963923541	7.584127592	20.34311163	21.05082801	0.321307847	16.32602241	-5.555341036	0.000444012	0.013099891	-	3	224412720	224415754	+	2947	-	NA	Pkinase
gene:Zm00001d031020	1.091325795	0	0.963923541	14.22023924	15.82242015	23.79658819	0.685083112	17.94641586	-4.778363283	0.000449098	0.013234562	-	1	173943638	173944196	-	510	-	NA	Pkinase_Tyr
gene:Zm00001d026238	46.92700918	53.49515604	40.48478871	14.22023924	9.041382944	3.661013567	46.96898464	8.974211916	2.391391377	0.000450341	0.013249104	-	10	141680042	141685861	-	4958	-	NA	MatE
gene:Zm00001d017268	100.4019731	26.74757802	175.4340844	14.22023924	19.21293876	19.22032123	100.8612119	17.55116641	2.522678182	0.000450636	0.013249104	MYB-transcription_factor_41	5	191151367	191152674	-	1030	-	NA	Myb_DNA-binding
gene:Zm00001d043520	13.09590954	0.862825097	5.783541244	27.49246252	100.5853853	47.59317638	6.580758627	58.55700805	-3.175582726	0.000465963	0.013683888	-	3	202661050	202663881	-	1536	-	NA	-
gene:Zm00001d014428	121.1371632	364.1121911	195.6764788	712.9079937	757.2158216	644.3383879	226.9752777	704.8207344	-1.633041076	0.000467277	0.01370661	-	5	46505771	46508810	-	1141	-	NA	Complex1_17_2kD
gene:Zm00001d002136	24.00916749	8.628250975	8.675311866	42.66071771	64.41985348	100.6778731	13.77091011	69.25281476	-2.344085937	0.000470838	0.013795054	-	2	6496902	6497840	-	939	-	NA	-
gene:Zm00001d027957	55.65761554	8.628250975	20.24239435	127.9821531	119.798324	180.3049182	28.17608696	142.6951318	-2.350641376	0.000472113	0.013795054	MADS-transcription_factor_68	1	18299864	18321135	-	2392	-	NA	SRF-TF
gene:Zm00001d046380	52.38363815	71.61448309	35.66517101	101.4377065	187.6086961	332.2369812	53.22109742	207.0944613	-1.959167222	0.00047212	0.013795054	-	9	85595708	85597921	+	2214	-	NA	-
gene:Zm00001d053513	673.3480154	188.9586963	431.8377462	1203.980255	1396.893665	1724.33739	431.381486	1441.737104	-1.741591723	0.000472808	0.013795054	-	4	232561161	232562672	+	1512	-	NA	UDPGT
gene:Zm00001d028816	171.3381498	4437.509476	1932.666699	304.3131196	308.537193	34.77962889	2180.504775	215.8766472	3.336807172	0.000473011	0.013795054	pathogenesis-related_protein6	1	47445913	47446888	+	899	-	NA	-
gene:Zm00001d028400	50.20098656	26.74757802	97.35627761	5.688095694	5.65086434	15.55930766	58.10161406	8.966089232	2.684986434	0.000473896	0.013803245	-	1	33597142	33600523	+	1601	-	NA	Thaumatin
gene:Zm00001d013443	1520.216832	677.3177015	856.9280277	2024.962067	3327.228924	3493.522197	1018.154187	2948.571063	-1.534368173	0.000474379	0.013803245	C2C2-CO-like-transcription_factor_8	5	11710780	11712488	-	1607	-	NA	CCT
gene:Zm00001d024522	219.3564848	58.67210663	41.44871225	19.90833493	0	5.491520351	106.4924345	8.466618427	3.640396059	0.000475769	0.013827826	bHLH-transcription_factor_116	10	75943680	75945921	+	1260	-	NA	HLH
gene:Zm00001d048311	600.2291872	154.4456924	508.9516295	111.865882	123.1888426	108.9151536	421.2088364	114.6566261	1.876856102	0.000477171	0.013852689	sucrose_transporter7	9	154421758	154426112	+	2311	-	NA	-
gene:Zm00001d018233	233.5437201	265.75013	313.2751507	138.4103286	70.07071782	57.66096369	270.8563336	88.71400336	1.60956433	0.000478055	0.01385709	-	5	217111113	217125566	+	5502	-	NA	Ion_trans
gene:Zm00001d011426	319.7584579	560.8363134	487.7453116	224.6797799	152.5733372	125.3897147	456.1133609	167.5476106	1.445170427	0.000478414	0.01385709	-	8	150205443	150211752	-	3383	-	NA	Pkinase
gene:Zm00001d039531	44.74435759	18.98215214	233.2694968	15.16825518	10.17155581	8.237280527	98.99866886	11.19236384	3.144257096	0.000479601	0.013875626	WRKY-transcription_factor_27	3	7394664	7395768	+	822	-	NA	WRKY
gene:Zm00001d014924	463.8134628	873.1789987	662.2154724	304.3131196	248.638031	261.7624701	666.4026446	271.5712069	1.295328291	0.000482575	0.013945763	-	5	68745480	68748342	-	2281	-	NA	-
gene:Zm00001d023759	196.4386431	258.8475292	732.5818909	1057.037783	1717.862759	1742.642458	395.9560211	1505.847667	-1.926975064	0.000490727	0.014165199	-	10	19056769	19063074	+	1365	-	NA	FMN_dh
gene:Zm00001d045661	1035.668179	167.3880689	857.8919512	3046.92326	2733.888168	3002.946379	686.9827331	2927.919269	-2.091919018	0.000492041	0.014186983	C2C2-CO-like-transcription_factor_4	9	32056769	32058471	+	1581	-	NA	CCT
gene:Zm00001d006930	267.3748197	547.0311118	328.6979274	162.1107273	137.8810899	116.2371808	381.0346196	138.7429993	1.458454397	0.000495407	0.014267835	-	2	219607348	219608151	+	804	-	NA	-
gene:Zm00001d037052	829.4076041	738.5782834	2801.161809	489.1762297	309.6673658	273.6607642	1456.382566	357.5014532	2.026281278	0.000496096	0.01427149	-	6	110619969	110628366	+	2005	-	NA	UQ_con
gene:Zm00001d032985	21.8265159	17.25650195	2.891770622	0	0	0	13.99159616	0	6.2573795	0.000500581	0.01438419	-	1	245797940	245803282	-	4868	-	NA	-
gene:Zm00001d012510	2363.811672	974.1295351	3879.792251	779.2691101	752.6951301	435.6606145	2405.911153	655.8749516	1.875165353	0.000504432	0.014478445	-	8	175694309	175696390	+	1440	-	NA	p450
gene:Zm00001d008651	174.6121272	103.5390117	315.2029978	18.96031898	49.72760619	64.98299082	197.7847122	44.556972	2.150122385	0.000505551	0.014494169	pyruvate_decarboxylase2	8	15983269	15986705	-	2140	-	NA	TPP_enzyme_N
gene:Zm00001d013689	10.91325795	4.314125487	25.06201206	53.08889315	108.4965953	65.89824421	13.4297985	75.8279109	-2.499939001	0.00050987	0.014601516	nine-cis-epoxycarotenoid_dioxygenase9	5	17465790	17467595	-	1806	-	NA	RPE65
gene:Zm00001d024645	106.9499279	120.7955136	162.9030784	36.97262201	55.37847054	47.59317638	130.2161733	46.64808964	1.48392931	0.000514665	0.014722217	-	10	82004050	82010075	+	1572	-	NA	-
gene:Zm00001d025588	0	0	0	20.85635088	12.43190155	4.576266959	0	12.62150646	-6.146540846	0.000519524	0.014844465	pectin_methylesterase1	10	123299914	123302351	-	2396	-	NA	-
gene:Zm00001d053120	113.4978827	51.76950585	552.3281888	36.97262201	44.07674185	10.9830407	239.1985258	30.67746819	2.96581514	0.00052878	0.015078485	-	4	214561712	214564106	+	2306	-	NA	Pkinase
gene:Zm00001d006230	164.790195	203.626723	156.1556136	75.84127592	28.2543217	60.40672386	174.8575105	54.83410716	1.668867506	0.000528903	0.015078485	-	2	202392518	202411974	+	1367	-	NA	DnaJ_C
gene:Zm00001d006555	239.0003491	458.1601268	743.1850499	147.8904881	175.1767945	121.7287011	480.1151752	148.2653279	1.696265757	0.000532604	0.015139179	-	2	210897100	210897660	-	452	-	NA	-
gene:Zm00001d006825	55.65761554	25.88475292	169.6505432	16.11627113	7.911210076	0.915253392	83.73097054	8.314244867	3.333534932	0.000532794	0.015139179	-	2	217434556	217438784	-	2960	-	NA	-
gene:Zm00001d024839	18026.51948	4132.932217	35878.19811	5074.729375	3713.748044	1326.202165	19345.88327	3371.559862	2.520543097	0.000532822	0.015139179	glutathione_S-transferase2	10	90384434	90385822	-	1127	-	NA	GST_N
gene:Zm00001d042876	0	0	0	3.792063796	14.69224728	20.13557462	0	12.87329523	-6.175378938	0.000534372	0.015164867	-	3	182604861	182606378	+	1076	-	NA	Acyltransferase
gene:Zm00001d014773	814.1290429	1205.366661	982.238088	538.4730591	395.5605038	314.8471668	1000.577931	416.2935766	1.265370542	0.000535113	0.015164867	calcium_dependent_protein_kinase1	5	62639884	62646464	+	2310	-	NA	Pkinase
gene:Zm00001d006143	33.83109964	28.47322822	9.639235407	2.844047847	0	0	23.98118775	0.948015949	4.622069583	0.000535519	0.015164867	-	2	199701466	199706707	+	5179	-	NA	-
gene:Zm00001d046937	2893.104682	904.2407022	1014.047565	370.6742361	585.4295457	391.7284517	1603.79765	449.2774112	1.835906346	0.000537391	0.015196115	bZIP-transcription_factor_17	9	111794987	111797460	-	1628	-	NA	bZIP_1
gene:Zm00001d035899	104.7672763	79.37990897	60.72718306	399.1147145	153.7035101	240.7116421	81.62478945	264.5099556	-1.698311987	0.00053782	0.015196115	-	6	58736545	58738571	-	1676	-	NA	-
gene:Zm00001d012415	51.29231236	1.725650195	21.2063179	217.0956523	165.0052387	161.9998504	24.74142682	181.3669138	-2.882714614	0.000542293	0.015305457	-	8	174152244	174153551	-	1308	-	NA	-
gene:Zm00001d014062	340.493648	356.3467653	347.0124746	150.7345359	97.19486665	33.8643755	347.9509626	93.93125935	1.889878955	0.000543769	0.015330046	-	5	31160276	31161727	-	1452	-	NA	-
gene:Zm00001d015284	0	0	0	13.27222329	5.65086434	16.47456105	0	11.79921623	-6.053368051	0.000548832	0.015455608	-	5	82695650	82696633	-	984	-	NA	-
gene:Zm00001d018454	4560.650497	13048.50395	8523.97587	3680.197914	2713.545056	1970.540553	8711.043439	2788.094508	1.643606834	0.000551168	0.015504186	-	5	221144871	221153975	+	6970	-	NA	Pyr_redox_2
gene:Zm00001d012795	18.55253851	28.47322822	24.09808852	0.948015949	1.130172868	4.576266959	23.70795175	2.218151925	3.391020213	0.00055318	0.015543562	-	5	35783	42435	-	5152	-	NA	-
gene:Zm00001d033718	703.9051377	315.7939857	1467.091629	266.3924817	207.9518077	159.2540902	828.9302508	211.1994599	1.972585266	0.000556287	0.015613584	-	1	272130665	272132998	-	1294	-	NA	-
gene:Zm00001d006182	161.5162176	111.3044376	137.8410663	62.56905264	21.47328449	21.05082801	136.8872405	35.03105505	1.962443908	0.000557717	0.015636412	-	2	200890503	200891555	-	1053	-	NA	-
gene:Zm00001d030644	39.28772861	103.5390117	76.14995971	24.64841468	12.43190155	10.06778731	72.99223334	15.71603451	2.21554074	0.000562662	0.015757633	MYB-transcription_factor_100	1	150483395	150485385	-	1424	-	NA	Myb_DNA-binding
gene:Zm00001d006001	1591.153009	835.2146944	922.4748284	350.7659011	545.8734953	358.7793296	1116.280844	418.4729087	1.415773516	0.000563324	0.015758791	WRKY-transcription_factor_71	2	195047188	195051225	-	2749	-	NA	-
gene:Zm00001d020527	4.365303179	0	0.963923541	11.37619139	36.16553178	33.8643755	1.776408907	27.13536622	-3.9980915	0.000564785	0.015775879	-	7	120934159	120935457	-	606	-	NA	Glycos_transf_1
gene:Zm00001d027656	1656.632557	5648.053088	4474.533076	1591.718778	983.2503952	783.4569034	3926.40624	1119.475359	1.810430772	0.000565178	0.015775879	lethal_leaf_spot1	1	10261506	10265855	+	2219	-	NA	-
gene:Zm00001d035815	479.0920239	409.8419213	397.1364988	695.8437066	1104.178892	1782.913607	428.690148	1194.312069	-1.478427902	0.000566228	0.015787797	-	6	52063289	52064242	+	954	-	NA	-
gene:Zm00001d007803	6.547954769	50.90668075	26.98985914	0	3.390518604	0.915253392	28.14816489	1.435257332	4.357172441	0.000567922	0.015803678	-	2	239911351	239915449	+	2145	-	NA	Pkinase
gene:Zm00001d035636	38.19640282	18.98215214	12.53100603	2.844047847	0	0	23.23652033	0.948015949	4.574438064	0.000568319	0.015803678	-	6	37916341	37917723	+	783	-	NA	-
gene:Zm00001d004331	104.7672763	50.90668075	31.80947684	210.4595407	203.4311163	224.237081	62.49447797	212.709246	-1.771317361	0.000568822	0.015803678	-	2	103987483	103990264	-	719	-	NA	-
gene:Zm00001d008853	15.27856113	20.70780234	33.73732392	0	3.390518604	0	23.24122913	1.130172868	4.472100736	0.000569732	0.015803678	bHLH-transcription_factor_62	8	22586868	22590558	-	1680	-	NA	HLH
gene:Zm00001d048020	439.8042953	98.36206111	449.18837	63.51706859	70.07071782	6.406773743	329.1182421	46.66485338	2.820350252	0.000569912	0.015803678	hemoglobin1	9	148178266	148179408	+	788	-	NA	-
gene:Zm00001d028514	570.7633907	491.8103056	600.5243658	303.3651037	250.8983767	252.6099362	554.3660207	268.9578055	1.042984587	0.000570762	0.015809984	MAP_kinase_kinase_kinase11	1	37841039	37846575	-	2629	-	NA	Pkinase
gene:Zm00001d037768	1.091325795	3.45130039	9.639235407	36.02460606	30.51466744	39.35589585	4.727287197	35.29838978	-2.890333077	0.000574388	0.015893072	-	6	136796927	136798665	-	1548	-	NA	PALP
gene:Zm00001d042556	13.09590954	22.43345253	37.59301809	0.948015949	3.390518604	2.745760176	24.37412672	2.361431576	3.385963039	0.000580934	0.016056685	-	3	171674280	171676629	-	1554	-	NA	-
gene:Zm00001d028471	29168.95584	9114.88433	10621.47349	52746.65939	53757.80264	53918.49257	16301.77122	53474.3182	-1.71384266	0.000582147	0.016072714	phosphoenolpyruvate_carboxykinase1	1	35960441	35964750	+	2766	-	NA	-
gene:Zm00001d011684	1556.230583	2048.346781	1546.133359	960.3401564	690.5356224	757.8298085	1716.903575	802.9018624	1.096441498	0.000587083	0.016191369	-	8	158588724	158594994	+	5875	-	NA	-
gene:Zm00001d006838	81.84943461	193.2728218	101.2119718	44.55674961	35.03535891	19.22032123	125.4447427	32.93747658	1.932544365	0.000592379	0.016278856	-	2	217672226	217674611	-	1765	-	NA	-
gene:Zm00001d015270	8.730606359	10.35390117	17.35062373	36.97262201	65.55002635	53.08469673	12.14504375	51.86911503	-2.090096027	0.000592659	0.016278856	-	5	82297001	82298182	-	1182	-	NA	-
gene:Zm00001d006828	7.639280564	20.70780234	18.31454727	0.948015949	0	0	15.55387673	0.316005316	5.453059794	0.000592772	0.016278856	-	2	217457356	217462858	-	4119	-	NA	-
gene:Zm00001d004495	28.37447067	6.039775682	4.819617703	70.15318023	94.93452092	64.98299082	13.07795468	76.69023066	-2.568484638	0.000592822	0.016278856	-	2	115167981	115170867	+	1233	-	NA	-
gene:Zm00001d023253	202.9865978	76.79143368	129.1657545	516.6686922	446.4182829	300.2031125	136.3145953	421.0966959	-1.629350991	0.000595782	0.016342473	-	10	1474578	1476845	+	2268	-	NA	Pkinase
gene:Zm00001d016439	1363.065918	1673.880689	1817.959798	772.6329985	840.8486138	835.6263468	1618.302135	816.3693197	0.987350555	0.000597005	0.016358322	-	5	162354770	162359026	+	1794	-	NA	-
gene:Zm00001d036410	421.2517568	488.3590052	564.8591948	258.8083541	218.1233635	162.9151038	491.4899856	213.2822738	1.204890816	0.000600097	0.016425315	-	6	87193666	87199740	-	1804	-	NA	AAA
gene:Zm00001d017874	317.5758063	278.6925065	304.5998389	735.6603765	632.8968061	521.6944334	300.2893839	630.083872	-1.069449644	0.000602299	0.016466221	-	5	209352390	209357003	-	1307	-	NA	-
gene:Zm00001d016121	9.821932153	25.88475292	59.76325952	3.792063796	1.130172868	3.661013567	31.82331487	2.861083411	3.455713662	0.000602994	0.016466221	-	5	145590206	145591017	+	690	-	NA	-
gene:Zm00001d011895	3.273977384	35.375829	6.747464785	0	0	0	15.13242372	0	6.37653592	0.000603539	0.016466221	-	8	164149048	164153140	+	2369	-	NA	BRCT
gene:Zm00001d028962	718.092373	423.6471229	1484.442253	294.8329602	209.0819806	64.06773743	875.3939162	189.3275594	2.209333973	0.00060683	0.016528267	WRKY-transcription_factor_32	1	53030837	53032126	+	962	-	NA	WRKY
gene:Zm00001d004452	468.178766	193.2728218	232.3055733	577.341713	1038.628866	1267.625948	297.9190537	961.1988422	-1.690894489	0.000607116	0.016528267	-	2	113081276	113083183	+	1323	-	NA	CBS
gene:Zm00001d012131	178.9774304	405.5277958	465.5750702	133.6702488	54.24829767	109.830407	350.0267654	99.24965117	1.816858806	0.000612249	0.016650156	-	8	168615878	168619047	+	2296	-	NA	-
gene:Zm00001d022560	450.7175533	1192.424285	981.2741644	370.6742361	240.7268209	271.8302574	874.8053341	294.4104381	1.571163898	0.000613958	0.016663708	LON_protease2	7	180055178	180064698	+	4489	-	NA	AAA
gene:Zm00001d012036	4159.042604	1523.749122	1298.405009	5722.224268	8575.751723	9885.651886	2327.065579	8061.209292	-1.792625614	0.000614061	0.016663708	sucrose_phosphate_synthase1	8	166917606	166923260	+	3802	-	NA	Glycos_transf_1
gene:Zm00001d007027	433.2563405	120.7955136	1461.308088	96.6976268	150.3129915	91.52533919	671.7866473	112.8453191	2.574276411	0.000616246	0.016705145	-	2	220378885	220379460	-	576	-	NA	-
gene:Zm00001d013367	2190.29087	540.9913361	842.4691746	3671.665771	5372.841815	3944.742119	1191.25046	4329.749901	-1.862089945	0.000616908	0.016705235	alpha_tubulin4	5	9834794	9838085	-	3113	-	NA	Tubulin
gene:Zm00001d025103	318.6671321	195.8612971	370.1466396	1174.591761	618.2045588	678.2027634	294.8916896	823.666361	-1.482578493	0.000618022	0.016717567	-	10	104219161	104224390	-	2722	-	NA	-
gene:Zm00001d040838	0	0	0.963923541	16.11627113	15.82242015	10.9830407	0.321307847	14.307244	-5.365032752	0.000623846	0.016857117	-	3	69660612	69661469	+	858	-	NA	C2
gene:Zm00001d044100	40.37905441	0.862825097	187.9650904	4.740079745	3.390518604	0	76.40232331	2.71019945	4.825647986	0.000628971	0.016977546	-	3	219087568	219088353	-	786	-	NA	-
gene:Zm00001d014951	363.4114897	273.5155559	215.9188731	558.381394	733.4821914	680.0332702	284.2819729	657.2989518	-1.209790755	0.000629809	0.016982084	-	5	69611597	69615673	+	1492	-	NA	-
gene:Zm00001d002654	351.4069059	218.2947497	322.9143861	613.366319	663.4114736	711.1518855	297.5386806	662.643226	-1.156146038	0.000630494	0.016982497	naked_endosperm1	2	18312495	18320006	-	7238	-	NA	-
gene:Zm00001d023843	893.795826	1790.362077	2074.36346	667.4032281	307.4070201	122.6439545	1586.173788	365.8180676	2.116390929	0.000633614	0.017036047	-	10	24286776	24290769	-	2269	-	NA	-
gene:Zm00001d032206	5.456628974	0	0	13.27222329	35.03535891	55.8304569	1.818876325	34.7126797	-4.324529841	0.000633824	0.017036047	MYB-transcription_factor_125	1	217042533	217044651	-	1633	-	NA	Myb_DNA-binding
gene:Zm00001d036103	84.0320862	80.24273407	45.30440641	121.3460415	307.4070201	270.915004	69.85974223	233.2226885	-1.738956322	0.000636721	0.017095796	-	6	72363462	72364610	-	1149	-	NA	-
gene:Zm00001d021519	111.3152311	57.80928153	26.0259356	252.1722424	287.0639085	196.7794793	65.0501494	245.3385434	-1.918043908	0.00064126	0.017199466	-	7	154989542	154995305	+	2715	-	NA	-
gene:Zm00001d023135	0	0	0	8.532143541	7.911210076	17.38981445	0	11.27772269	-5.987097669	0.000641995	0.017200987	-	10	85868373	85868731	+	264	-	NA	-
gene:Zm00001d031217	1060.768673	836.0775195	883.9178868	524.2528198	402.341541	332.2369812	926.9213596	419.6104474	1.143203957	0.000647317	0.017325276	pentatricopeptide_repeat*-GRMZM2G475897	1	182484848	182492517	-	3534	-	NA	-
gene:Zm00001d027419	5.456628974	0	1.927847081	11.37619139	48.59743333	37.52538907	2.461492019	32.49967126	-3.769795855	0.000652559	0.017447188	bHLH-transcription_factor_140	1	4891941	4894990	+	1460	-	NA	HLH
gene:Zm00001d032510	318.6671321	361.5237158	265.0789737	624.7425104	608.033003	745.9315144	315.0899405	659.5690093	-1.065663999	0.000655279	0.017501471	-	1	229000799	229004582	-	3282	-	NA	NB-ARC
gene:Zm00001d042739	1129.522198	73.34013329	984.165935	118.5019936	140.1414356	93.35584597	729.009422	117.3330917	2.635471484	0.000656731	0.01752181	-	3	178562121	178563551	-	1431	-	NA	UDPGT
gene:Zm00001d033389	78.57545723	65.57470741	507.9877059	51.19286125	23.73363023	13.72880088	217.3792902	29.55176412	2.878387714	0.000657551	0.017525254	-	1	261380066	261380422	+	357	-	NA	-
gene:Zm00001d006551	745.3755179	710.1050552	672.8186314	404.8028102	323.2294403	258.1014565	709.4330682	328.7112357	1.109864871	0.000659616	0.017561841	GRAS-transcription_factor_49	2	210843272	210854196	+	1854	-	NA	GRAS
gene:Zm00001d000060	1455.82861	465.0627275	1142.249396	2595.667668	3453.808285	3224.4377	1021.046911	3091.304551	-1.598471194	0.000664667	0.017677774	-	B73V4_ctg10	292300	293833	+	1339	-	NA	Aldo_ket_red
gene:Zm00001d049110	2.18265159	67.3003576	0.963923541	0	0	0	23.48231091	0	7.008559576	0.000669407	0.017785188	-	4	16395425	16395890	-	414	-	NA	-
gene:Zm00001d021729	845.777491	848.1570708	815.4793154	486.3321819	316.4484031	383.4911712	836.4712924	395.4239187	1.080331142	0.000671915	0.017833158	kinase_interacting_kinase1	7	161576147	161582076	-	3118	-	NA	Pkinase_Tyr
gene:Zm00001d050479	18.55253851	11.21672627	13.49492957	0	0	0.915253392	14.42139812	0.305084464	5.338003018	0.000672895	0.017840501	-	4	91832546	91833685	-	1140	-	NA	Abhydrolase_3
gene:Zm00001d013823	42.561706	0	53.01579474	0	1.130172868	0	31.85916691	0.376724289	6.48258484	0.000674855	0.017856505	-	5	21439333	21442116	-	1684	-	NA	FAD_binding_4
gene:Zm00001d018809	1368.522547	157.8969928	1025.614647	172.5389027	188.738869	169.3218775	850.6780623	176.8665497	2.265779254	0.00067501	0.017856505	glutathione_transferase6	7	5834880	5838491	-	1513	-	NA	-
gene:Zm00001d009952	448.5349017	48.31820546	228.4498791	1333.85844	1197.98324	962.8465683	241.7676621	1164.896083	-2.269665657	0.00067561	0.017856505	-	8	92079626	92080870	+	1245	-	NA	-
gene:Zm00001d043752	1998.21753	321.8337614	3900.034646	589.6659203	232.8156108	180.3049182	2073.361979	334.2621498	2.632738683	0.000678993	0.017902101	-	3	209087178	209088617	+	1440	-	NA	UDPGT
gene:Zm00001d035717	1745.029946	649.7072984	692.0971022	2909.460948	3735.221329	2789.692338	1028.944782	3144.791538	-1.612125912	0.000679255	0.017902101	-	6	42705454	42708241	+	1558	-	NA	DUF6
gene:Zm00001d040383	735.5535857	547.0311118	584.1376657	1131.931043	1253.361711	1511.08335	622.2407877	1298.792035	-1.062074382	0.000679452	0.017902101	-	3	40873806	40877173	-	3087	-	NA	-
gene:Zm00001d008397	3173.575411	1319.259574	4574.781124	11955.42913	8018.576499	8942.940892	3022.538703	9638.982175	-1.673186664	0.00068225	0.017957176	-	8	7232820	7233317	+	498	-	NA	-
gene:Zm00001d048034	46.92700918	7.765425877	0.963923541	0	0	0	18.55211953	0	6.661925128	0.000683416	0.017969227	-	9	148452875	148461393	-	6731	-	NA	-
gene:Zm00001d053307	0	0	0	9.48015949	20.34311163	5.491520351	0	11.77159716	-6.041870816	0.000686159	0.018022671	-	4	225273773	225276778	-	2577	-	NA	DUF315
gene:Zm00001d048602	81.84943461	24.15910273	166.7587725	21.80436683	13.56207442	8.237280527	90.92243663	14.53457392	2.644515878	0.000687629	0.018042617	GRAS-transcription_factor_72	4	1048188	1050188	-	2001	-	NA	GRAS
gene:Zm00001d008017	178.9774304	228.6486508	321.9504626	76.78929187	48.59743333	113.4914206	243.1921813	79.6260486	1.60806025	0.000689153	0.018049397	-	8	34012101	34012742	+	642	-	NA	-
gene:Zm00001d021680	101.4932989	154.4456924	114.7069013	54.98492504	14.69224728	20.13557462	123.5486309	29.93758232	2.04106866	0.00068931	0.018049397	-	7	159839512	159843067	+	1249	-	NA	-
gene:Zm00001d028269	329.58039	465.9255526	667.9990137	212.3555726	170.6561031	196.7794793	487.8349855	193.2637183	1.335670672	0.000691664	0.018082959	HSF-transcription_factor_14	1	28714876	28733871	+	12242	-	NA	-
gene:Zm00001d047774	21.8265159	26.74757802	44.34048287	0.948015949	5.65086434	5.491520351	30.9715256	4.030133547	2.953636166	0.000692204	0.018082959	-	9	141475604	141479079	+	2286	-	NA	-
gene:Zm00001d000042	30.55712226	7.765425877	10.60315895	0	1.130172868	0	16.30856903	0.376724289	5.512642458	0.00069273	0.018082959	-	B73V4_ctg182	729582	756794	-	2977	-	NA	Arm
gene:Zm00001d003209	3299.077878	1715.296294	3554.950018	1388.843365	562.8260883	389.8979449	2856.441397	780.5224662	1.871562045	0.000695093	0.018125997	-	2	36039302	36040798	-	1497	-	NA	AAA
gene:Zm00001d029078	570.7633907	132.875065	223.6302614	711.9599777	1353.947096	1678.574721	309.0895724	1248.160598	-2.014707843	0.000701962	0.018286328	IDP1489	1	57267805	57269655	-	1252	-	NA	-
gene:Zm00001d006502	34.92242543	49.18103056	70.36641847	127.0341372	188.738869	134.5422486	51.48995815	150.1050849	-1.540334664	0.000707915	0.018422501	-	2	210092166	210095107	+	647	-	NA	-
gene:Zm00001d023635	1293.221067	1673.880689	1734.09845	807.7095886	786.6003162	789.8636772	1567.066735	794.7245273	0.979671693	0.000710962	0.018482839	-	10	13070016	13075806	-	1476	-	NA	-
gene:Zm00001d019550	70.93617666	103.5390117	133.0214486	29.38849442	38.42587751	34.77962889	102.498879	34.19800028	1.586695753	0.000712162	0.018495085	-	7	41861976	41864144	-	1133	-	NA	-
gene:Zm00001d024852	538.0236169	217.4319246	3125.040119	263.5484338	122.0586698	20.13557462	1293.498553	135.2475594	3.257644731	0.000713326	0.018506359	1-aminocyclopropane-1-carboxylate_oxidase3	10	90656251	90657509	-	1259	-	NA	2OG-FeII_Oxy
gene:Zm00001d000502	933.0835546	1469.391141	3848.946698	760.3087911	123.1888426	128.1354749	2083.807131	337.2110362	2.627203594	0.000720661	0.01867755	-	3	27549265	27550063	-	691	-	NA	-
gene:Zm00001d038352	192.0733399	345.9928641	280.5017503	35.07659011	57.63881627	128.1354749	272.8559848	73.61696042	1.888737729	0.000722972	0.018718333	-	6	155011567	155014793	-	2726	-	NA	-
gene:Zm00001d004354	4470.070456	7067.400373	6338.761204	3262.122881	2482.989791	2280.811453	5958.744011	2675.308041	1.155333357	0.00072753	0.018802749	-	2	105824109	105832763	-	1123	-	NA	CBS
gene:Zm00001d037512	2858.182257	2150.160143	2279.679174	4093.532868	5873.508395	5259.961243	2429.340524	5075.667502	-1.063091298	0.000727714	0.018802749	-	6	127655622	127659899	+	1709	-	NA	-
gene:Zm00001d053452	1765.765136	1969.829698	1811.212333	1100.646517	898.4874301	857.5924282	1848.935722	952.242125	0.957289089	0.000729935	0.018840943	-	4	232176354	232182440	+	2990	-	NA	PAM2
gene:Zm00001d044455	34.92242543	0	21.2063179	206.6674769	1086.096126	780.7111433	18.70958111	691.1582488	-5.21025095	0.000733349	0.01890982	-	3	228435563	228439044	+	1885	-	NA	-
gene:Zm00001d008496	18.55253851	8.628250975	28.91770622	66.36111643	98.32503952	64.06773743	18.69949857	76.2512978	-2.031292321	0.000736979	0.018984133	-	8	10382235	10384292	-	1865	-	NA	-
gene:Zm00001d006397	1615.162176	386.5456437	2781.883338	361.1940766	452.0691472	267.2539904	1594.530386	360.1724047	2.146538142	0.000743662	0.019136845	-	2	206585770	206587212	-	1443	-	NA	UDPGT
gene:Zm00001d000748	0	0	0	1.896031898	13.56207442	26.54234836	0	14.00015156	-6.297413426	0.000746264	0.019184342	-	2	6286803	6287213	+	411	-	NA	-
gene:Zm00001d028088	958.1840479	1415.895985	1122.007001	571.6536173	530.0510751	592.1689445	1165.362345	564.6245456	1.045524794	0.000748447	0.019212805	-	1	22599568	22606524	+	5810	-	NA	CUE
gene:Zm00001d022477	148.4203081	2.588475292	69.40249493	711.9599777	634.026979	451.2199222	73.47042611	599.0689596	-3.029998226	0.000749942	0.019212805	-	7	178367323	178367646	-	324	-	NA	-
gene:Zm00001d011638	689.7179023	1186.384509	2089.786236	588.7179044	248.638031	183.9659318	1321.962883	340.4406224	1.957083507	0.00075019	0.019212805	-	8	157105897	157112089	+	6139	-	NA	-
gene:Zm00001d006213	987.6498443	930.1254551	1051.640583	1545.265997	3101.19435	2350.37071	989.8052941	2332.277019	-1.236424628	0.0007504	0.019212805	-	2	201970912	201971385	-	474	-	NA	Histone
gene:Zm00001d038675	12.00458374	196.7241222	59.76325952	851.3183222	528.9209023	352.3725559	89.49732183	577.5372601	-2.687324252	0.000754239	0.019291644	-	6	162375302	162385552	+	9432	-	NA	-
gene:Zm00001d043075	437.6216437	921.4972041	519.5547884	295.7809761	192.1293876	132.7117418	626.2245454	206.8740352	1.598320675	0.000758041	0.019369359	-	3	188435277	188444488	+	6479	-	NA	-
gene:Zm00001d025099	326.3064127	704.0652795	122.4182897	1458.996546	1376.550553	1685.896748	384.2633273	1507.147949	-1.971158557	0.000762125	0.01945411	-	10	103947429	103948783	-	498	-	NA	-
gene:Zm00001d048139	164.790195	206.2151983	137.8410663	65.41310048	59.89916201	79.62704509	169.6154865	68.31310253	1.311011966	0.000766675	0.019550609	-	9	150708823	150712178	-	1079	-	NA	-
gene:Zm00001d018969	1478.746452	3106.170351	2045.445753	934.7437258	984.3805681	782.5416501	2210.120852	900.5553146	1.295512512	0.000776845	0.019790037	tryptophan_synthase_alpha_subunit1	7	11057172	11061083	+	1220	-	NA	-
gene:Zm00001d000665	38.19640282	1.725650195	7.711388325	0	0	0	15.87781378	0	6.436132269	0.000780068	0.019852232	-	3	183967671	183969318	-	1238	-	NA	-
gene:Zm00001d014330	1824.696729	1457.31159	1122.970925	570.7056013	709.7485611	730.3722067	1468.326415	670.2754564	1.131286373	0.000784761	0.019951653	-	5	41110451	41123892	-	10721	-	NA	-
gene:Zm00001d021208	0	7.765425877	9.639235407	36.97262201	67.81037208	37.52538907	5.801553761	47.43612772	-3.009962401	0.000789683	0.02005668	AP2-EREBP-transcription_factor_115	7	146038525	146039307	-	783	-	NA	AP2
gene:Zm00001d037005	144.0550049	99.22488621	649.6844664	66.36111643	61.02933488	16.47456105	297.6547858	47.95500412	2.635451728	0.000792223	0.020101081	-	6	108815418	108816992	+	1575	-	NA	FAD_binding_4
gene:Zm00001d003639	136.4157244	61.26058192	130.129678	29.38849442	16.95259302	41.18640263	109.2686614	29.17583003	1.897488226	0.000796244	0.020182919	-	2	51313714	51314292	+	366	-	NA	efhand
gene:Zm00001d038387	46.92700918	6.90260078	5.783541244	127.9821531	87.02331084	165.6608639	19.8710504	126.888776	-2.687468155	0.000800024	0.020258497	-	6	156102753	156103963	-	941	-	NA	-
gene:Zm00001d027702	20.7351901	1.725650195	19.27847081	0	0	0	13.9131037	0	6.247042796	0.000802868	0.020310229	-	1	11490592	11492813	+	1896	-	NA	-
gene:Zm00001d029708	950.5447673	235.5512516	2902.373781	321.3774067	221.5138821	61.32197726	1362.823267	201.404422	2.758592695	0.000804763	0.020329996	glutathione_transferase30	1	83411025	83411720	+	696	-	NA	-
gene:Zm00001d027480	518.3797525	535.8143855	488.7092351	298.6250239	216.9931907	228.813348	514.3011244	248.1438542	1.050935873	0.000805251	0.020329996	-	1	6270311	6275109	+	2772	-	NA	Pkinase
gene:Zm00001d012383	13.09590954	35.375829	31.80947684	4.740079745	1.130172868	0	26.76040513	1.956750871	3.767758755	0.000808603	0.020394321	-	8	173271092	173275059	-	2610	-	NA	-
gene:Zm00001d053911	284.8360325	126.8352893	230.3777262	404.8028102	673.5830294	755.9993017	214.0163493	611.4617138	-1.515742097	0.000809754	0.020403058	-	4	243523053	243529919	-	2832	-	NA	-
gene:Zm00001d049957	218.265159	3550.525276	1892.18191	105.2297703	480.3234689	39.35589585	1886.990782	208.303045	3.180337781	0.000821202	0.020671003	kaurene_synthase6	4	55492468	55496164	-	2660	-	NA	-
gene:Zm00001d032372	1.091325795	3.45130039	10.60315895	23.70039873	32.77501317	66.81349761	5.048595044	41.09630317	-3.017442502	0.00082774	0.020814922	-	1	224206626	224207189	+	564	-	NA	-
gene:Zm00001d037406	5.456628974	6.90260078	24.09808852	0	0	0	12.15243942	0	6.0559794	0.000834562	0.020965678	-	6	124644010	124645197	-	898	-	NA	MatE
gene:Zm00001d007031	169.1554982	215.7062744	833.7938627	120.3980255	75.72158216	76.88128492	406.2185451	91.00029754	2.157977854	0.000837724	0.021024308	-	2	220439682	220441965	+	811	-	NA	-
gene:Zm00001d040210	335.037019	94.04793563	151.3359959	456.9436874	873.623627	696.5078312	193.4736502	675.6917152	-1.805748915	0.000843962	0.021159936	-	3	32101450	32101662	+	213	-	NA	-
gene:Zm00001d014098	22.91784169	26.74757802	7.711388325	55.93294099	79.11210076	105.2541401	19.12560268	80.09972727	-2.065194384	0.000846162	0.021194136	-	5	32364753	32373491	-	6264	-	NA	-
gene:Zm00001d014356	42.561706	97.49923602	51.08794766	19.90833493	15.82242015	11.89829409	63.71629656	15.87634973	2.00865836	0.000847959	0.021218215	-	5	42477757	42478810	-	813	-	NA	-
gene:Zm00001d041327	46.92700918	43.14125487	151.3359959	24.64841468	9.041382944	7.322027135	80.46808665	13.67060825	2.553923205	0.000860897	0.021520734	-	3	112397485	112399899	+	2321	-	NA	-
gene:Zm00001d002402	319.7584579	174.2906697	235.1973439	522.3567879	566.2166069	591.2536912	243.0821572	559.942362	-1.205260409	0.000862939	0.021550551	-	2	11994467	11998302	+	1708	-	NA	-
gene:Zm00001d014124	5156.514381	4805.072968	5363.27058	3101.908185	2498.812211	2199.353901	5108.285976	2600.024766	0.974296201	0.000864176	0.021560223	-	5	33239071	33244411	-	4492	-	NA	AAA
gene:Zm00001d004440	82.94076041	19.84497724	88.68096574	193.3952536	301.7561558	245.287909	63.82223446	246.8131061	-1.954179338	0.000869924	0.021682305	-	2	112115736	112117938	+	2114	-	NA	-
gene:Zm00001d010319	527.1103589	457.2973017	724.8705026	297.677008	239.596648	198.609986	569.7593877	245.2945474	1.215785043	0.00087169	0.021704995	-	8	109386250	109388789	+	1915	-	NA	p450
gene:Zm00001d048445	24.00916749	161.3482932	54.94364182	19.90833493	9.041382944	8.237280527	80.10036751	12.39566613	2.691731748	0.000883543	0.021978563	-	9	156577584	156583021	-	5071	-	NA	-
gene:Zm00001d010171	1723.20343	917.1830786	1742.773762	665.5071962	638.5476705	427.423334	1461.053423	577.1594002	1.339992704	0.000886282	0.022007062	-	8	102865067	102866878	+	1373	-	NA	Pyrophosphatase
gene:Zm00001d006563	243.3656522	161.3482932	169.6505432	71.10119618	89.28365658	76.88128492	191.4548295	79.08871256	1.275562821	0.000886698	0.022007062	-	2	210989743	210992007	+	948	-	NA	DnaJ_C
gene:Zm00001d002168	105.8586021	106.9903121	113.7429778	475.9040064	381.9984294	153.7625698	108.863964	337.2216686	-1.630775884	0.000887291	0.022007062	-	2	7088395	7092058	-	2898	-	NA	Pkinase
gene:Zm00001d016863	272.8314487	173.4278446	241.9448087	435.1393206	523.2700379	574.7791301	229.4013673	511.0628295	-1.156781301	0.000892892	0.022124365	-	5	178551174	178635959	-	3372	-	NA	-
gene:Zm00001d035988	0	0	0	15.16825518	9.041382944	7.322027135	0	10.51055509	-5.883566611	0.000900577	0.022284764	-	6	64831967	64832901	+	832	-	NA	-
gene:Zm00001d028721	9.821932153	241.5910273	169.6505432	8.532143541	29.38449457	8.237280527	140.3545009	15.38463955	3.198651602	0.000901146	0.022284764	LBD-transcription_factor_4	1	44340623	44341737	-	1008	-	NA	-
gene:Zm00001d006944	1203.732352	1370.166255	912.835593	610.5222712	554.9148782	519.8639266	1162.244733	561.7670253	1.048950728	0.000902	0.022284764	-	2	219965544	219970180	-	2271	-	NA	Pkinase
gene:Zm00001d024105	34.92242543	0.862825097	8.675311866	58.77698884	186.4785232	138.2032622	14.82018747	127.8195914	-3.121154754	0.000906199	0.022366729	-	10	45703239	45704101	-	725	-	NA	-
gene:Zm00001d031064	135.3243986	138.9148407	133.0214486	255.9643062	274.6320069	306.6098863	135.7535626	279.0687332	-1.039648293	0.000908415	0.022383412	ARF-transcription_factor_34	1	175371170	175379288	-	5769	-	NA	Auxin_resp
gene:Zm00001d036787	10.91325795	1.725650195	115.6708249	2.844047847	0	0	42.76991101	0.948015949	5.46724065	0.00090864	0.022383412	-	6	100878714	100879367	-	654	-	NA	-
gene:Zm00001d049630	46.92700918	57.80928153	48.19617703	17.06428708	15.82242015	10.06778731	50.97748925	14.31816485	1.83708614	0.000916304	0.022550333	-	4	38147590	38150947	-	1640	-	NA	-
gene:Zm00001d012398	53.47496395	49.18103056	93.50058345	15.16825518	12.43190155	23.79658819	65.38552598	17.13224831	1.925641625	0.000924686	0.022734551	-	8	173581012	173587177	-	5217	-	NA	-
gene:Zm00001d035444	33.83109964	36.23865409	48.19617703	105.2297703	83.63279224	156.50833	39.42197692	115.1236309	-1.547131293	0.000928656	0.022810059	-	6	25699705	25702944	+	2391	-	NA	-
gene:Zm00001d028557	437.6216437	324.4222367	1379.374587	203.823429	198.9104248	169.3218775	713.8061557	190.6852438	1.904440923	0.000933735	0.022892308	-	1	39085728	39086204	+	477	-	NA	-
gene:Zm00001d015100	1399.079669	1245.056616	1652.164949	828.5659395	660.0209549	564.7113428	1432.100411	684.4327457	1.06509785	0.000933809	0.022892308	-	5	75366376	75373323	+	1944	-	NA	Pkinase
gene:Zm00001d012338	448.5349017	570.3273894	315.2029978	729.9722808	1474.875593	1322.541151	444.6884296	1175.796342	-1.402409086	0.000934838	0.022895399	-	8	172708664	172712351	-	2254	-	NA	-
gene:Zm00001d047149	204.0779236	169.9765442	193.7486317	383.9464594	375.2173922	367.9318635	189.2676998	375.6985717	-0.989920976	0.0009524	0.023303026	-	9	120108014	120109480	+	1467	-	NA	-
gene:Zm00001d033079	3.273977384	4.314125487	3.855694163	42.66071771	18.08276589	19.22032123	3.814599012	26.65460161	-2.800703892	0.000961661	0.023506961	-	1	249834193	249838726	-	1405	-	NA	Lipase_GDSL
gene:Zm00001d045369	44.74435759	10.35390117	177.3619315	14.22023924	1.130172868	1.830506784	77.48673008	5.726972963	3.74786479	0.00096825	0.023645238	-	9	19932217	19932887	+	671	-	NA	-
gene:Zm00001d014046	194.2559915	221.7460501	221.7024144	91.95754706	105.1060767	102.5083799	212.568152	99.85733456	1.090947138	0.000969978	0.023648713	cyclin-dependent_kinase_inhibitor2	5	30559090	30562350	+	1303	-	NA	-
gene:Zm00001d029720	2503.501373	1038.841417	1594.329536	3758.883238	4903.820075	4518.605996	1712.224109	4393.769769	-1.359796255	0.00097151	0.023648713	-	1	84035920	84036564	-	645	-	NA	-
gene:Zm00001d020973	221.5391364	241.5910273	193.7486317	91.00953111	115.2776325	91.52533919	218.9595984	99.27083428	1.143179889	0.000971523	0.023648713	-	7	138248896	138256381	-	4933	-	NA	DnaJ
gene:Zm00001d047917	132.0504212	17.25650195	620.7667602	41.71270176	27.12414883	18.30506784	256.6912278	29.04730614	3.143460598	0.000972135	0.023648713	-	9	145316019	145318700	-	1769	-	NA	ACT
gene:Zm00001d048224	108.0412537	37.10147919	68.43857139	179.1750144	211.3423263	274.5760176	71.19376809	221.6977861	-1.643199036	0.000973052	0.023648713	-	9	152684333	152685043	-	711	-	NA	-
gene:Zm00001d039000	559.8501327	239.002552	1031.398189	174.4349346	185.3483504	172.9828911	610.0836244	177.5887254	1.780383978	0.000975367	0.023682274	-	6	168516159	168518324	-	1574	-	NA	DnaJ_C
gene:Zm00001d022496	20.7351901	4.314125487	9.639235407	0	0	0	11.56285033	0	5.97864543	0.000976533	0.023687937	-	7	178785539	178787159	+	1448	-	NA	Lipase_GDSL
gene:Zm00001d020170	443.0782727	451.257526	382.6776457	171.5908868	245.2475124	140.033769	425.6711481	185.624056	1.19914081	0.000984986	0.02387015	-	7	97038326	97042873	+	2584	-	NA	-
gene:Zm00001d029539	150.6029597	56.08363134	140.7328369	15.16825518	20.34311163	45.76266959	115.806476	27.09134547	2.090513784	0.000995946	0.024112728	-	1	75377980	75379495	-	1332	-	NA	-
gene:Zm00001d046474	12.00458374	213.9806242	183.1454727	1945.328727	602.3821387	416.4402933	136.3768935	988.0503865	-2.855913322	0.001002719	0.024253569	-	9	91600859	91601719	-	677	-	NA	-
gene:Zm00001d038909	98.21932153	111.3044376	196.6404023	60.67302074	31.64484031	29.28810854	135.3880538	40.53532319	1.738445972	0.001004351	0.024269915	-	6	166809707	166813310	+	1492	-	NA	-
gene:Zm00001d046117	0	1.725650195	0	5.688095694	29.38449457	23.79658819	0.575216732	19.62305948	-4.985702429	0.001006936	0.024309206	-	9	64257623	64258456	-	603	-	NA	-
gene:Zm00001d018438	28.37447067	370.1519668	207.2435612	54.0369091	14.69224728	9.152533919	201.9233329	25.96056343	2.958459139	0.001014902	0.024478229	-	5	220885277	220890325	-	2986	-	NA	TBC
gene:Zm00001d039103	94.94534415	33.6501788	563.8952713	26.54444657	40.68622325	3.661013567	230.8302648	23.63056113	3.292434353	0.001018446	0.024540379	-	6	170106206	170106700	-	495	-	NA	-
gene:Zm00001d008810	0	0	0	13.27222329	7.911210076	9.152533919	0	10.11198909	-5.828567718	0.001021122	0.024581521	-	8	21254507	21266662	+	2395	-	NA	-
gene:Zm00001d046192	26.19181908	0.862825097	26.98985914	82.47738757	134.4905713	158.3388368	18.01483444	125.1022652	-2.803385318	0.001034256	0.024874107	-	9	71208640	71209000	+	361	-	NA	-
gene:Zm00001d046539	1265.937922	1426.249886	1221.291126	731.8683127	723.3106356	610.4740124	1304.492978	688.5509869	0.922096419	0.001043099	0.025063024	-	9	94817071	94823847	+	4656	-	NA	AAA
gene:Zm00001d011007	13.09590954	8.628250975	8.675311866	0	0	0	10.13315746	0	5.791195626	0.001061843	0.025489244	-	8	136513437	136514465	-	882	-	NA	-
gene:Zm00001d002754	0	0	0	2.844047847	14.69224728	17.38981445	0	11.64203653	-6.02967042	0.001067491	0.025600621	Homeobox-transcription_factor_53	2	21690129	21691754	+	1043	-	NA	Homeobox
gene:Zm00001d034916	89.48871518	15.53085175	19.27847081	182.9670782	198.9104248	197.6947326	41.43267925	193.1907452	-2.228309896	0.001069289	0.025619523	-	1	305500618	305502078	-	1461	-	NA	MatE
gene:Zm00001d007630	170.246824	98.36206111	36.62909455	295.7809761	356.0044534	448.474162	101.7459932	366.7531972	-1.8517039	0.001071511	0.025648541	-	2	236500894	236507850	+	5372	-	NA	-
gene:Zm00001d005840	16.36988692	5.176950585	10.60315895	0	0	0	10.71666548	0	5.869934248	0.001075377	0.025716818	-	2	190539671	190546933	-	5237	-	NA	-
gene:Zm00001d002620	0	0	0.963923541	18.01230303	11.30172868	10.06778731	0.321307847	13.12727301	-5.242689195	0.001077183	0.025735759	AP2-EREBP-transcription_factor_68	2	16974028	16974666	-	639	-	NA	AP2
gene:Zm00001d011833	10208.26148	6553.156615	7876.219251	15809.11397	18109.89004	16051.71399	8212.545784	16656.906	-1.020255364	0.001080082	0.025780724	-	8	162293750	162297261	-	1404	-	NA	NAD_binding_1
gene:Zm00001d030678	535.8409653	191.5471716	160.9752313	843.7341947	918.8305417	1133.083699	296.1211227	965.2161452	-1.705843107	0.001088705	0.025962137	MYB-transcription_factor_56	1	152667851	152669369	-	1327	-	NA	Myb_DNA-binding
gene:Zm00001d047981	30.55712226	19.84497724	72.29426555	7.584127592	4.520691472	0	40.89878835	4.034939688	3.348716331	0.001090221	0.025973866	-	9	147117784	147120247	-	1966	-	NA	-
gene:Zm00001d012456	12.00458374	82.83120936	87.7170422	10.42817544	9.041382944	0.915253392	60.8509451	6.794937259	3.172966174	0.001095908	0.026065568	-	8	174833821	174838094	-	4274	-	NA	2OG-FeII_Oxy
gene:Zm00001d046066	75.30147984	128.5609395	49.16010057	19.90833493	29.38449457	8.237280527	84.34083998	19.17670334	2.146927118	0.001096124	0.026065568	-	9	60867878	60868629	+	249	-	NA	-
gene:Zm00001d039718	43.65303179	139.7776658	182.1815492	41.71270176	22.60345736	20.13557462	121.8707489	28.15057791	2.114021018	0.001099215	0.026114579	-	3	12973562	12977694	+	2416	-	NA	-
gene:Zm00001d002626	15.27856113	4.314125487	3.855694163	22.75238278	55.37847054	64.98299082	7.816126926	47.70461471	-2.629089162	0.00110097	0.026131823	-	2	17190893	17193599	+	2011	-	NA	p450
gene:Zm00001d003954	349.2242543	50.90668075	152.2999194	647.4948932	770.777896	846.6093875	184.1436182	754.9607256	-2.037303164	0.001102237	0.026137436	-	2	72101436	72103487	-	1487	-	NA	-
gene:Zm00001d043103	13.09590954	18.98215214	13.49492957	0.948015949	0	0.915253392	15.19099708	0.62108978	4.550524102	0.001114454	0.026402471	-	3	189308754	189309825	-	591	-	NA	-
gene:Zm00001d034617	843.5948394	675.5920513	707.5198789	394.3746348	366.1760093	398.1352255	742.2355899	386.2286232	0.94192009	0.001117362	0.026446657	-	1	297877086	297882893	-	3202	-	NA	Acid_phosphat_A
gene:Zm00001d027292	211.7172042	94.91076072	120.4904426	363.0901085	402.341541	338.643755	142.3728025	368.0251348	-1.372413754	0.001137681	0.026902493	GRAS-transcription_factor_53	1	2019934	2021379	+	1446	-	NA	GRAS
gene:Zm00001d048604	713.7270698	283.006632	1023.6868	236.0559713	230.5552651	169.3218775	673.4735007	211.9777046	1.667722699	0.001144313	0.027015692	GRAS-transcription_factor_34	4	1058559	1060856	-	2298	-	NA	GRAS
gene:Zm00001d021929	24.00916749	379.6430429	400.9921929	28.44047847	48.59743333	1.830506784	268.2148011	26.28947286	3.355526631	0.001144597	0.027015692	geranylgeranyl_pyrophosphate_synthase2	7	166016446	166018185	-	1477	-	NA	-
gene:Zm00001d041752	88.39738938	5.176950585	23.13416498	180.1230303	281.4130441	250.7794294	38.90283498	237.4385013	-2.615970909	0.001146993	0.02701915	-	3	135965422	135969913	-	4411	-	NA	Sec7
gene:Zm00001d009938	1100.056401	2542.745562	3795.930903	975.5084116	724.4408084	291.0505786	2479.577622	663.6665995	1.901722022	0.001148441	0.02701915	-	8	90687124	90692850	-	1159	-	NA	-
gene:Zm00001d017247	38.19640282	99.22488621	115.6708249	18.96031898	22.60345736	25.62709497	84.36403797	22.3969571	1.915192552	0.001148989	0.02701915	-	5	190232645	190237410	-	2991	-	NA	VWA
gene:Zm00001d007010	0	0	1.927847081	20.85635088	12.43190155	16.47456105	0.642615694	16.58760449	-4.688922275	0.001150782	0.02701915	-	2	220153465	220153869	+	405	-	NA	-
gene:Zm00001d018924	1.091325795	0	0	4.740079745	19.21293876	19.22032123	0.363775265	14.39111324	-5.372928681	0.001150886	0.02701915	-	7	9439993	9441906	+	1470	-	NA	-
gene:Zm00001d039624	277.1967519	71.61448309	96.39235407	553.6413142	484.8441604	494.2368316	148.4011963	510.9074354	-1.785999471	0.001151133	0.02701915	Aux/IAA-transcription_factor_8	3	9366940	9370004	+	1165	-	NA	-
gene:Zm00001d028219	54.56628974	155.3085175	31.80947684	366.8821723	247.5078581	329.4912211	80.56142804	314.6270838	-1.962709667	0.001152289	0.02702128	-	1	26903676	26908356	+	2010	-	NA	-
gene:Zm00001d036417	654.7954769	691.9857282	826.0824744	381.1024115	365.0458364	386.2369314	724.2878931	377.4617264	0.940177038	0.001155586	0.027073577	-	6	87639671	87644146	+	1888	-	NA	-
gene:Zm00001d020967	79.66678302	1.725650195	131.0936015	4.740079745	6.781037208	0	70.82867825	3.840372318	4.220518748	0.001157055	0.027082996	-	7	138148362	138149066	+	705	-	NA	-
gene:Zm00001d021959	13.09590954	2.588475292	68.43857139	0.948015949	1.130172868	1.830506784	28.04098541	1.302898534	4.419248305	0.001159073	0.02710521	-	7	167126358	167127384	+	1027	-	NA	-
gene:Zm00001d006242	941.8141609	1655.761362	1595.29346	761.2568071	495.0157162	443.8978951	1397.622994	566.7234728	1.30232093	0.001169013	0.027312482	-	2	202646606	202650071	-	3092	-	NA	-
gene:Zm00001d044922	0	1.725650195	3.855694163	13.27222329	27.12414883	24.71184158	1.860448119	21.7027379	-3.516395585	0.001170752	0.027327948	-	9	7295915	7298705	-	1508	-	NA	-
gene:Zm00001d005993	4.365303179	7.765425877	13.49492957	33.18055822	61.02933488	32.94912211	8.541886209	42.3863384	-2.30088479	0.001179796	0.02751376	CCAAT-HAP5-transcription_factor_512	2	194914879	194915718	+	840	-	NA	-
gene:Zm00001d038126	320.8497837	55.22080624	99.28412469	408.594874	901.8779487	755.9993017	158.4515715	688.8240415	-2.121893675	0.001181609	0.027529791	-	6	148784939	148788210	-	1147	-	NA	-
gene:Zm00001d026542	291.3839872	169.9765442	240.9808852	384.8944753	714.2692526	679.1180168	234.1138055	592.7605816	-1.340996035	0.001182654	0.027529791	G2-like-transcription_factor_52	10	147942412	147945498	-	2204	-	NA	Myb_DNA-binding
gene:Zm00001d027763	100.4019731	32.7873537	94.46450699	194.3432696	242.9871666	281.8980447	75.88461127	239.742827	-1.662881617	0.001187193	0.027610116	-	1	13052386	13053952	+	1461	-	NA	-
gene:Zm00001d003220	411.4298247	1138.066304	1135.501931	396.2706667	263.3302783	216.9150539	894.9993531	292.1719996	1.615270985	0.001196165	0.027793309	-	2	36506464	36511337	-	2438	-	NA	-
gene:Zm00001d014659	1065.133976	449.5318758	837.6495569	1346.182648	2785.87612	2577.353552	784.1051361	2236.470773	-1.512396962	0.001199113	0.027836322	-	5	57820596	57821726	-	766	-	NA	MIF
gene:Zm00001d047077	1555.139258	775.6797626	1327.322716	2156.736284	3469.630705	3487.115423	1219.380579	3037.827471	-1.317101472	0.001201553	0.027867462	-	9	117527633	117530311	+	1878	-	NA	-
gene:Zm00001d021294	61.11424451	60.39775682	92.53665991	159.2666794	161.6147201	195.8642259	71.34955375	172.2485418	-1.271790681	0.001203369	0.027875515	-	7	148128045	148129250	+	1206	-	NA	PPR
gene:Zm00001d028083	77.48413143	37.96430429	47.23225349	109.0218341	187.6086961	176.6439046	54.22689641	157.758145	-1.544491598	0.001204097	0.027875515	-	1	22219133	22221566	+	1591	-	NA	-
gene:Zm00001d008982	81.84943461	132.0122399	161.9391548	54.0369091	37.29570465	40.27114924	125.2669431	43.86792099	1.513420049	0.001207041	0.027918193	-	8	28558735	28561301	+	1430	-	NA	-
gene:Zm00001d040850	241.1830007	2120.82409	726.7983497	257.8603381	236.2061294	173.8981445	1029.601813	222.6548707	2.209604943	0.001210318	0.027968489	-	3	71571869	71601459	+	3952	-	NA	-
gene:Zm00001d042972	19.64386431	7.765425877	22.17024144	44.55674961	77.9819279	72.30501796	16.52651054	64.94789849	-1.981398447	0.001215291	0.028038051	-	3	185399775	185404897	+	4430	-	NA	-
gene:Zm00001d033898	1903.272186	835.2146944	1063.207665	2622.212115	3443.636729	3573.149242	1267.231515	3212.999362	-1.342530269	0.001215816	0.028038051	Homeobox-transcription_factor_36	1	277881879	277892452	-	3457	-	NA	POX
gene:Zm00001d015091	2203.38678	404.6649707	6912.29571	825.7218916	328.8803046	97.93211293	3173.449154	417.5114364	2.926117838	0.001216643	0.028038051	-	5	75192664	75194979	+	1680	-	NA	-
gene:Zm00001d033988	43.65303179	6.039775682	47.23225349	148.838504	144.6621271	151.0168097	32.30835366	148.1724803	-2.202858115	0.001219341	0.028074724	-	1	280476817	280478577	-	984	-	NA	-
gene:Zm00001d030542	33.83109964	56.08363134	106.0315895	6.636111643	20.34311163	1.830506784	65.31544015	9.603243351	2.786590103	0.001225071	0.028181086	hydroxycinnamoyltransferase4	1	142569190	142571156	-	1786	-	NA	-
gene:Zm00001d045521	0	0	0	5.688095694	5.65086434	21.9660814	0	11.10168048	-5.965459756	0.001230241	0.028274365	-	9	25318479	25319292	-	716	-	NA	-
gene:Zm00001d042022	364.5028155	692.8485533	1980.862876	348.8698692	226.0345736	118.0676876	1012.738082	230.9907101	2.13250659	0.001240757	0.02847875	-	3	147649548	147650907	-	1271	-	NA	-
gene:Zm00001d014674	909.0743871	956.010208	618.8389131	409.54289	352.6139348	418.2708001	827.9745027	393.475875	1.073015298	0.001241379	0.02847875	-	5	58597635	58609068	-	3426	-	NA	-
gene:Zm00001d002700	200.8039462	75.92860858	276.6460562	419.9710654	586.5597185	853.0161612	184.459537	619.8489817	-1.749560785	0.001250543	0.028662742	-	2	19546182	19546508	+	327	-	NA	-
gene:Zm00001d038446	15.27856113	6.90260078	35.66517101	1.896031898	0	0.915253392	19.28211097	0.937095097	4.314272899	0.001251658	0.028662742	-	6	157407857	157411040	+	840	-	NA	AP2
gene:Zm00001d046554	1562.778538	2415.047448	1113.331689	805.8135567	701.8373511	509.7961393	1697.052559	672.482349	1.335675009	0.001258548	0.028794544	-	9	95762282	95767578	-	3016	-	NA	-
gene:Zm00001d046642	51.29231236	20.70780234	88.68096574	144.0984243	228.2949193	209.5930267	53.56036015	193.9954568	-1.85856495	0.001261191	0.028796006	-	9	100126399	100131680	+	1568	-	NA	Lipase_GDSL
gene:Zm00001d003903	38.19640282	27.61040312	48.19617703	9.48015949	2.260345736	0	38.00099432	3.913501742	3.273079882	0.001261426	0.028796006	ZIM-transcription_factor_33	2	66485018	66487506	-	841	-	NA	Zim
gene:Zm00001d046941	876.3346132	1232.977064	959.103923	572.6016332	496.1458891	419.1860535	1022.8052	495.9778586	1.044493031	0.001262017	0.028796006	-	9	111964859	111969002	+	2032	-	NA	Pkinase_Tyr
gene:Zm00001d035714	52.38363815	12.94237646	59.76325952	96.6976268	256.549241	180.3049182	41.69642471	177.8505954	-2.095731885	0.001266	0.028824315	-	6	42350002	42351952	+	1486	-	NA	DUF6
gene:Zm00001d047801	339.4023222	434.8638491	712.3394966	246.4841468	167.2655845	135.457502	495.5352226	183.0690777	1.436659316	0.001266041	0.028824315	-	9	142137063	142141520	+	1475	-	NA	-
gene:Zm00001d019173	813.0377171	721.3217815	925.3665991	494.8643254	315.3182302	316.6776736	819.9086992	375.6200764	1.125766942	0.001266666	0.028824315	-	7	20343147	20347941	-	2789	-	NA	-
gene:Zm00001d038853	9.821932153	6.039775682	14.45885311	0	0	0	10.10685365	0	5.788044996	0.00126999	0.028874073	-	6	165894363	165897634	+	3272	-	NA	-
gene:Zm00001d021789	72.02750246	6.90260078	1.927847081	0.948015949	0	0.915253392	26.95265011	0.62108978	5.384872951	0.001271936	0.028892411	-	7	163020921	163026932	-	1962	-	NA	Asp
gene:Zm00001d035243	574.0373681	56.94645643	119.526519	1162.267554	1583.372188	1112.032871	250.1701145	1285.890871	-2.362943956	0.001273316	0.028897895	-	6	16653132	16655500	+	1837	-	NA	Aa_trans
gene:Zm00001d002328	0	4.314125487	14.45885311	53.08889315	50.85777906	47.59317638	6.257659533	50.51328286	-3.002829051	0.001274852	0.028901427	-	2	10448587	10449884	-	904	-	NA	-
gene:Zm00001d031657	1922.91605	626.4110208	696.9167199	391.530587	288.1940814	356.9488228	1082.081264	345.5578304	1.646241901	0.00127575	0.028901427	-	1	197692665	197700005	-	2533	-	NA	Metallophos
gene:Zm00001d016707	843.5948394	655.7470741	555.2199594	1131.931043	1692.998956	1656.608639	684.8539576	1493.846213	-1.125356247	0.001279731	0.028965756	-	5	173184539	173187110	-	1244	-	NA	-
gene:Zm00001d047385	1308.499628	980.1693107	1507.576418	685.4155312	536.8321123	609.558759	1265.415119	610.6021342	1.050947187	0.001287659	0.029094717	-	9	128358053	128362509	+	3973	-	NA	-
gene:Zm00001d044838	387.4206572	312.3426853	386.5333398	160.2146954	187.6086961	188.5421987	362.0988941	178.7885301	1.01796038	0.001287722	0.029094717	-	9	4681922	4687585	+	5410	-	NA	-
gene:Zm00001d007890	376.5073992	1452.997464	734.509738	356.4539968	180.8276589	202.2709996	854.6715338	246.5175518	1.793668428	0.001293212	0.029192776	-	2	241881184	241885273	+	2984	-	NA	YTH
gene:Zm00001d006493	14.18723533	66.43753251	61.6911066	5.688095694	2.260345736	11.89829409	47.43862481	6.615578508	2.828160275	0.001297364	0.029260457	-	2	209822231	209825657	+	2780	-	NA	MatE
gene:Zm00001d035063	1.091325795	0	0.963923541	7.584127592	15.82242015	24.71184158	0.685083112	16.03946311	-4.611140904	0.001301957	0.029310886	-	6	3469975	3471537	-	1402	-	NA	Lipase_GDSL
gene:Zm00001d043600	354.6808833	1007.779714	780.778068	260.704386	267.8509697	253.5251895	714.4128884	260.6935151	1.454960995	0.001302382	0.029310886	-	3	204844393	204848290	-	1530	-	NA	Pribosyltran
gene:Zm00001d020371	350.3155801	86.28250975	286.2852916	998.2607943	676.973548	723.0501796	240.9611272	799.428174	-1.731405919	0.001304196	0.029310886	-	7	109922014	109929866	-	2294	-	NA	-
gene:Zm00001d013346	8.730606359	0	6.747464785	24.64841468	54.24829767	50.33893655	5.159357048	43.07854963	-3.08517419	0.001304221	0.029310886	GRF-transcription_factor_14	5	9051468	9063110	-	2086	-	NA	-
gene:Zm00001d054002	307.7538741	559.9734883	344.120704	182.0190622	169.5259302	167.4913707	403.9493555	173.012121	1.224034225	0.001319664	0.029619718	-	4	244902407	244906004	-	1973	-	NA	-
gene:Zm00001d033957	283.7447067	220.883225	452.0801406	64.46508454	116.4078054	146.4405427	318.9026907	109.1044775	1.547269301	0.001320297	0.029619718	bHLH-transcription_factor_103	1	279603784	279609495	+	5350	-	NA	Asp
gene:Zm00001d034771	79.66678302	105.2646619	165.794849	200.9793812	354.8742806	496.0673384	116.9087646	350.6403334	-1.584002492	0.00132789	0.02976373	-	1	301729871	301734996	-	3328	-	NA	GTP_EFTU
gene:Zm00001d021714	508.5578204	176.0163199	376.8941044	724.2841851	1192.332376	1147.727753	353.8227482	1021.448105	-1.530321069	0.001330666	0.029771764	-	7	161106069	161110019	+	3593	-	NA	-
gene:Zm00001d035445	1037.850831	1912.020416	2297.029797	890.1869762	583.1691999	568.3723564	1748.967015	680.5761775	1.361691471	0.001331497	0.029771764	gamma-glutamylcysteine_synthetase1	6	25930825	25935845	-	2967	-	NA	-
gene:Zm00001d010527	353.5895575	70.75165799	146.5163782	615.2623509	681.4942394	743.1857542	190.2858646	679.9807815	-1.839167821	0.001331768	0.029771764	-	8	119321629	119322921	+	1293	-	NA	-
gene:Zm00001d053554	2775.241496	2727.390133	9843.587197	1823.03467	1225.107389	405.4572526	5115.406276	1151.199771	2.151752459	0.001340173	0.02993329	-	4	233852901	233854306	+	1210	-	NA	-
gene:Zm00001d012821	3016.424497	1990.5375	1965.440099	1211.564383	996.8124696	1138.575219	2324.134032	1115.650691	1.058559124	0.001353142	0.030196363	-	5	898964	904115	+	4275	-	NA	-
gene:Zm00001d017215	360.1375123	218.2947497	327.7340038	510.9805965	776.4287604	836.5416002	302.0554219	707.9836524	-1.229610108	0.001357803	0.030214075	-	5	189149122	189152796	-	1969	-	NA	-
gene:Zm00001d031641	187.7080367	130.2865897	93.50058345	250.2762105	409.1225782	411.8640263	137.16507	357.087605	-1.381480559	0.0013601	0.030214075	-	1	197111866	197115583	+	2103	-	NA	-
gene:Zm00001d013487	78.57545723	48.31820546	83.86134804	25.59643062	6.781037208	19.22032123	70.25167024	17.19926302	2.018866643	0.00136115	0.030214075	-	5	12653293	12653463	-	171	-	NA	-
gene:Zm00001d042323	84.0320862	6.039775682	0.963923541	0.948015949	0	0.915253392	30.34526181	0.62108978	5.559133217	0.001361249	0.030214075	-	3	161221006	161222988	-	984	-	NA	-
gene:Zm00001d027585	146.2376565	121.6583387	149.4081488	38.86865391	63.28968061	64.06773743	139.1013814	55.40869065	1.328757611	0.001364509	0.030214075	cyclin-dependent_kinase_inhibitor3	1	8485866	8489268	+	1300	-	NA	-
gene:Zm00001d029586	5.456628974	1.725650195	35.66517101	0	0	0	14.28248339	0	6.288048594	0.001364556	0.030214075	-	1	77958713	77959414	-	702	-	NA	-
gene:Zm00001d039454	709.3617666	633.3136216	1144.177243	416.1790016	350.3535891	237.9658819	828.950877	334.8328242	1.308030393	0.001364843	0.030214075	-	3	4760989	4762395	-	1407	-	NA	-
gene:Zm00001d032051	2.18265159	0	0	18.01230303	16.95259302	13.72880088	0.72755053	16.23123231	-4.59727303	0.001366657	0.030214075	-	1	210825161	210825686	-	450	-	NA	-
gene:Zm00001d000636	855.5994231	668.6894505	1123.934848	1381.259238	2635.563128	2437.319783	882.7412407	2151.380716	-1.285226752	0.001367375	0.030214075	-	3	159782306	159782950	+	645	-	NA	-
gene:Zm00001d017125	68.75352507	37.10147919	63.61895369	133.6702488	142.4017814	157.4235834	56.49131932	144.4985379	-1.359058392	0.001367644	0.030214075	-	5	186171790	186176962	+	3234	-	NA	-
gene:Zm00001d053393	410.3384989	315.7939857	994.769094	191.4992217	189.8690418	183.9659318	573.6338595	188.4447318	1.605973943	0.001367921	0.030214075	-	4	229056441	229061661	+	1957	-	NA	-
gene:Zm00001d013412	711.5444182	526.3233095	312.3112272	1007.740954	1358.467787	1565.0833	516.7263183	1310.43068	-1.34290518	0.001368225	0.030214075	-	5	10600423	10608150	-	3987	-	NA	Response_reg
gene:Zm00001d005766	781.3892691	575.50434	1478.658711	402.9067783	168.3957573	55.8304569	945.1841068	209.0443309	2.176678644	0.001371582	0.030236838	-	2	187317766	187318308	+	543	-	NA	-
gene:Zm00001d007714	21.8265159	82.83120936	240.0169616	23.70039873	18.08276589	16.47456105	114.8915623	19.41924189	2.565040344	0.001373057	0.030236838	-	2	238013082	238015359	+	2147	-	NA	Acyltransferase
gene:Zm00001d045459	218.265159	31.92452861	359.5434807	24.64841468	48.59743333	38.44064246	203.2443894	37.22883015	2.449794521	0.001374464	0.030236838	-	9	23089455	23089748	+	294	-	NA	-
gene:Zm00001d044495	2914.931198	2653.187175	1667.587725	6063.51001	4560.247523	5164.77489	2411.902033	5262.844141	-1.125732934	0.00137462	0.030236838	senescence_enhanced2b	3	229664664	229670336	-	2008	-	NA	-
gene:Zm00001d028565	44.74435759	34.5130039	69.40249493	5.688095694	15.82242015	12.81354749	49.55328547	11.44135444	2.121837475	0.001375214	0.030236838	-	1	39236494	39239663	+	1895	-	NA	-
gene:Zm00001d018787	686.4439249	471.1025032	592.8129775	1141.411203	1055.581459	1324.371658	583.4531352	1173.788106	-1.009092984	0.001377025	0.030250429	-	7	5210807	5216700	-	3545	-	NA	-
gene:Zm00001d044808	22.91784169	13.80520156	24.09808852	81.52937162	57.63881627	55.8304569	20.27371059	64.99954826	-1.686876355	0.001387328	0.030431793	-	9	3063954	3065189	-	1236	-	NA	-
gene:Zm00001d035170	961.4580252	1958.612971	1094.053219	608.6262393	559.4355697	519.8639266	1338.041405	562.6419119	1.25011522	0.001389274	0.030431793	-	6	7517294	7521650	+	2224	-	NA	-
gene:Zm00001d007092	4249.622645	2307.194311	2717.300461	6482.53306	6451.026731	7419.043995	3091.372472	6784.201262	-1.134067209	0.001389564	0.030431793	-	2	222127551	222132890	+	4664	-	NA	S1
gene:Zm00001d027405	302.2972452	122.5211638	267.0068208	98.5936587	71.20089069	70.47451117	230.6084099	80.08968685	1.524041693	0.001390078	0.030431793	-	1	4536701	4538190	-	1071	-	NA	HMA
gene:Zm00001d016322	1378.344479	64.71188231	62.65503014	2036.338259	5470.036681	5914.367418	501.9037971	4473.580786	-3.156366673	0.001393414	0.030478523	-	5	157111017	157120204	+	2019	-	NA	-
gene:Zm00001d014530	2375.816255	830.9005689	3596.39873	900.6151516	620.4649046	418.2708001	2267.705185	646.4502854	1.81056864	0.001400234	0.030601325	-	5	51914095	51915783	+	1536	-	NA	-
gene:Zm00001d009459	16.36988692	6.039775682	7.711388325	24.64841468	66.68019922	54.91520351	10.04035031	48.74793913	-2.291855972	0.001408027	0.030745162	-	8	65483156	65484503	+	1348	-	NA	-
gene:Zm00001d028718	3.273977384	11.21672627	33.73732392	0.948015949	0	0	16.07600919	0.316005316	5.498911675	0.001425735	0.03107988	proteolipid_membrane_potential_regulator4	1	44179372	44180241	-	757	-	NA	-
gene:Zm00001d002377	94.94534415	144.9546164	89.64488928	228.4718437	272.3716612	255.3556963	109.8482833	252.0664004	-1.195923301	0.001426618	0.03107988	-	2	11421796	11427495	+	1656	-	NA	-
gene:Zm00001d029741	126.5937922	119.9326886	1.927847081	479.6960702	681.4942394	716.6434058	82.81810928	625.9445718	-2.918210188	0.001427031	0.03107988	-	1	84866141	84867131	-	574	-	NA	-
gene:Zm00001d044106	5128.13991	536.6772106	10369.88945	1216.304463	979.8598766	605.8977454	5344.90219	934.0206949	2.516637944	0.001429684	0.031110953	-	3	219392311	219393785	-	1425	-	NA	UDPGT
gene:Zm00001d013865	161.5162176	337.3646131	222.6663379	552.6932983	585.4295457	563.7960894	240.5157229	567.3063111	-1.236445267	0.00143409	0.031180094	-	5	23269894	23273970	-	2428	-	NA	Peptidase_S28
gene:Zm00001d022005	200.8039462	12.07955136	213.991026	843.7341947	901.8779487	647.0841481	142.2915079	797.5654305	-2.487822483	0.001436644	0.031208879	-	7	167826857	167828773	-	1089	-	NA	-
gene:Zm00001d040755	25.10049328	17.25650195	95.42843053	4.740079745	7.911210076	0	45.92847525	4.217096607	3.468031214	0.001438342	0.031219035	-	3	63750504	63753717	+	2291	-	NA	Exo70
gene:Zm00001d006069	1166.627275	80.24273407	3382.407704	120.3980255	62.15950774	7.322027135	1543.092571	63.2931868	4.60772548	0.001452513	0.031499664	-	2	197412048	197413732	+	1365	-	NA	-
gene:Zm00001d022686	18.55253851	31.92452861	22.17024144	53.08889315	85.89313797	89.6948324	24.21576952	76.22562117	-1.647811023	0.001475979	0.031981232	-	1	19311897	19312622	-	726	-	NA	-
gene:Zm00001d026012	109.1325795	21.57062744	54.94364182	143.1504083	323.2294403	274.5760176	61.88228291	246.9852887	-2.000823995	0.001484788	0.032119719	-	10	135966636	135967690	-	902	-	NA	-
gene:Zm00001d003996	0	3.45130039	1.927847081	13.27222329	16.95259302	33.8643755	1.793049157	21.36306394	-3.526964224	0.001485594	0.032119719	-	2	74407929	74412907	-	2460	-	NA	-
gene:Zm00001d019726	60.02291872	134.6007152	374.0023338	65.41310048	16.95259302	14.64405427	189.5419892	32.33658259	2.549478353	0.001486168	0.032119719	-	7	54059859	54060383	-	525	-	NA	Cu_bind_like
gene:Zm00001d007038	692.9918797	795.5247399	656.4319312	423.7631292	331.1406503	349.6267957	714.9828503	368.1768584	0.957340507	0.001491044	0.032181533	-	2	220640379	220648182	+	5749	-	NA	Proteasome
gene:Zm00001d039001	65.47954769	36.23865409	80.96957742	12.32420734	14.69224728	21.9660814	60.8959264	16.32751201	1.894208603	0.001491565	0.032181533	-	6	168525940	168527755	-	909	-	NA	-
gene:Zm00001d035625	1.091325795	0	0.963923541	5.688095694	14.69224728	30.20336193	0.685083112	16.86123497	-4.681590902	0.001500575	0.032326064	-	6	37482838	37483682	-	559	-	NA	Cofilin_ADF
gene:Zm00001d051759	55.65761554	18.11932705	27.95378268	108.0738182	94.93452092	133.6269952	33.91024175	112.2117781	-1.735291105	0.001500812	0.032326064	-	4	168950986	168955426	+	3028	-	NA	-
gene:Zm00001d042962	62.20557031	62.12340702	21.2063179	161.1627113	162.744893	131.7964884	48.51176507	151.9013643	-1.646773777	0.00150397	0.032366598	-	3	184999153	185011550	+	3710	-	NA	TBC
gene:Zm00001d037713	22.91784169	20.70780234	17.35062373	38.86865391	89.28365658	80.54229848	20.32542259	69.56486966	-1.774907094	0.001505299	0.032367762	-	6	134933417	134935896	-	2092	-	NA	-
gene:Zm00001d044951	190.9820141	12.94237646	80.00565388	507.1885327	540.2226309	413.6945331	94.64334814	487.0352323	-2.366121124	0.00150822	0.032403111	-	9	8117227	8119831	-	2200	-	NA	DUF6
gene:Zm00001d026253	164.790195	80.24273407	53.01579474	36.97262201	15.82242015	7.322027135	99.34957461	20.0390231	2.30731144	0.0015147	0.032514784	-	10	142057742	142080822	-	8967	-	NA	E1-E2_ATPase
gene:Zm00001d017476	1281.216483	1875.781762	1592.401689	906.3032473	738.0028828	730.3722067	1583.133311	791.5594456	1.000113045	0.001516653	0.0325171	-	5	197139091	197145688	+	1809	-	NA	DnaJ_C
gene:Zm00001d002650	1008.385034	685.9459525	424.1263579	1530.097742	1822.968836	1826.84577	706.1524483	1726.637449	-1.290221294	0.001517371	0.0325171	argonaute1c	2	18176301	18185185	+	6459	-	NA	Piwi
gene:Zm00001d006384	304.4798968	469.376853	327.7340038	206.6674769	119.798324	113.4914206	367.1969179	146.6524072	1.324020392	0.001522933	0.032608755	-	2	206326049	206332270	-	2706	-	NA	-
gene:Zm00001d003381	111.3152311	16.39367685	72.29426555	247.4321627	331.1406503	230.6438548	66.66772449	269.7388893	-2.020139131	0.001529384	0.032695091	-	2	42343911	42345140	+	1230	-	NA	-
gene:Zm00001d024083	13.09590954	14.66802666	6.747464785	116.6059617	35.03535891	30.20336193	11.50380033	60.61489419	-2.397771523	0.001529542	0.032695091	-	10	42507737	42511403	-	2784	-	NA	-
gene:Zm00001d006738	1061.859998	1268.352893	1681.082655	612.4183031	473.5424317	742.2705008	1337.098516	609.4104119	1.133295182	0.001536251	0.032810854	-	2	215635319	215641061	+	2316	-	NA	-
gene:Zm00001d036431	42.561706	11.21672627	40.48478871	79.63333972	134.4905713	140.9490223	31.42107366	118.3576445	-1.919214491	0.001546508	0.033002143	-	6	88165017	88165909	+	893	-	NA	-
gene:Zm00001d010175	70.93617666	53.49515604	263.1511266	22.75238278	39.55605038	10.06778731	129.1941531	24.12540682	2.427033652	0.00155174	0.033085968	AP2-EREBP-transcription_factor_113	8	103046515	103049001	-	1256	-	NA	AP2
gene:Zm00001d035184	248.8222812	62.12340702	155.1916901	354.5579649	544.7433224	655.3214286	155.3791261	518.207572	-1.73966931	0.001557309	0.033176828	-	6	8532240	8535334	+	1963	-	NA	-
gene:Zm00001d007251	20.7351901	5.176950585	41.44871225	2.844047847	1.130172868	0.915253392	22.45361765	1.629824702	3.773590307	0.001572486	0.033472053	-	2	225688832	225690463	+	1632	-	NA	-
gene:Zm00001d040202	23848.74259	12238.31118	26567.66063	40104.86671	54369.22616	57402.86223	20884.9048	50625.6517	-1.277419957	0.001576686	0.03353332	-	3	31827897	31838331	+	4272	-	NA	-
gene:Zm00001d027387	183.3427335	27.61040312	133.9853722	706.271882	381.9984294	352.3725559	114.9795029	480.2142891	-2.064453308	0.001580094	0.033577654	-	1	4133373	4135619	-	2247	-	NA	Peptidase_S8
gene:Zm00001d043374	2.18265159	0	1.927847081	29.38849442	11.30172868	14.64405427	1.370166224	18.44475912	-3.800714992	0.001589506	0.033749407	-	3	198030697	198033316	+	2332	-	NA	-
gene:Zm00001d047799	50.20098656	57.80928153	249.656197	23.70039873	31.64484031	18.30506784	119.222155	24.55010229	2.283118197	0.001592326	0.033781012	-	9	142104072	142106918	+	2165	-	NA	HSP70
gene:Zm00001d006243	61.11424451	50.90668075	30.8455533	12.32420734	14.69224728	11.89829409	47.62215952	12.97158291	1.878465077	0.001606909	0.034061907	-	2	202663871	202670238	+	5404	-	NA	-
gene:Zm00001d007836	36.01375123	0	6.747464785	115.6579458	166.1354116	112.5761672	14.25373867	131.4565082	-3.217808769	0.001612026	0.034141848	-	2	240565474	240565986	-	513	-	NA	-
gene:Zm00001d019398	246.6396296	188.9586963	86.75311866	329.9095503	626.1157689	601.3214785	174.1171482	519.1155992	-1.576501957	0.00161437	0.034162986	-	7	31999185	32006505	+	2401	-	NA	ABC2_membrane
gene:Zm00001d049016	1791.956955	616.0571196	1517.215653	2636.432354	4539.904411	4005.148843	1308.409909	3727.161869	-1.510457799	0.001619102	0.034234572	-	4	12584214	12585332	-	1119	-	NA	Kelch_1
gene:Zm00001d013721	294.6579646	462.4742523	712.3394966	201.9273971	179.697486	198.609986	489.8239045	193.4116231	1.34067148	0.001624854	0.034327587	-	5	18529927	18533146	-	3142	-	NA	-
gene:Zm00001d012968	37.10507702	29.33605331	238.0891145	2.844047847	21.47328449	13.72880088	101.5100816	12.68204441	3.00758214	0.001626548	0.03433477	-	5	2459657	2460184	-	528	-	NA	-
gene:Zm00001d021842	196.4386431	343.4043888	310.3833801	114.7099298	141.2716085	108.9151536	283.408804	121.6322307	1.222489344	0.001634712	0.034459392	-	7	164334705	164337536	+	1299	-	NA	zf-AN1
gene:Zm00001d030858	94.94534415	19.84497724	604.38006	25.59643062	44.07674185	19.22032123	239.7234605	29.63116457	3.018532785	0.001635168	0.034459392	-	1	163697126	163697959	+	834	-	NA	-
gene:Zm00001d051513	19.64386431	49.18103056	29.88162976	7.584127592	5.65086434	6.406773743	32.90217487	6.547255225	2.32986675	0.001638163	0.034493862	-	4	161032328	161036601	+	2702	-	NA	UCH
gene:Zm00001d015279	1124.065569	918.9087288	1012.119718	574.4976651	548.133841	545.4910216	1018.364672	556.0408426	0.872762366	0.00164603	0.034579352	-	5	82559260	82562792	+	2070	-	NA	PP2C
gene:Zm00001d049879	19.64386431	36.23865409	0	0	0	0	18.62750613	0	6.672443696	0.001646108	0.034579352	-	4	49997747	50007011	-	1199	-	NA	-
gene:Zm00001d026425	75.30147984	35.375829	5.783541244	144.0984243	227.1647465	218.7455607	38.82028336	196.6695771	-2.344619365	0.001646311	0.034579352	-	10	145556564	145561470	-	1470	-	NA	RRM_1
gene:Zm00001d005969	469.2700918	732.5385078	663.179396	312.8452632	297.2354643	299.2878591	621.6626652	303.1228622	1.036658398	0.001651563	0.034658199	bHLH-transcription_factor_157	2	194253687	194260197	+	3488	-	NA	HLH
gene:Zm00001d042285	1337.965424	2049.209607	2362.576598	1044.713576	586.5597185	337.7285016	1916.583876	656.333932	1.546084851	0.001652797	0.034658199	-	3	158984072	158988815	+	2092	-	NA	Pkinase
gene:Zm00001d002425	4.365303179	3.45130039	0	14.22023924	20.34311163	44.8474162	2.605534523	26.47025569	-3.355565206	0.001660859	0.034798503	-	2	12403956	12406380	+	1569	-	NA	-
gene:Zm00001d013498	148.4203081	113.8929129	138.8049899	60.67302074	55.37847054	60.40672386	133.7060703	58.81940505	1.182751012	0.001663295	0.034820772	-	5	12805250	12807850	-	770	-	NA	-
gene:Zm00001d002075	98.21932153	77.65425877	142.660684	273.0285933	203.4311163	298.3726058	106.1780881	258.2774384	-1.283788689	0.00167215	0.034977292	AP2-EREBP-transcription_factor_197	2	5456239	5459958	-	2421	-	NA	AP2
gene:Zm00001d049173	45.83568338	381.3686931	180.2537021	56.88095694	42.94656899	21.05082801	202.4860262	40.29278465	2.331192328	0.001675424	0.035016903	WRKY-transcription_factor_36	4	19025176	19028095	-	1188	-	NA	WRKY
gene:Zm00001d042965	923.2616224	1805.892929	1134.538007	581.1337768	572.9976441	572.0333699	1287.89752	575.3882636	1.162696051	0.001682505	0.035135966	-	3	185081743	185087745	-	1811	-	NA	-
gene:Zm00001d027861	961.4580252	918.9087288	561.9674242	456.9436874	273.5018341	294.7115922	814.1113928	341.7190379	1.251975381	0.001685912	0.035178166	-	1	15582763	15585986	+	2044	-	NA	Aminotran_3
gene:Zm00001d019725	193.1646657	228.6486508	747.040744	150.7345359	33.90518604	72.30501796	389.6180202	85.64824663	2.183982159	0.001690811	0.035251385	-	7	54052810	54053334	+	525	-	NA	Cu_bind_like
gene:Zm00001d037499	1574.783122	1824.875081	2245.94185	1058.933815	983.2503952	788.9484238	1881.866684	943.710878	0.995900613	0.001693405	0.035276497	-	6	127482891	127494100	+	1307	-	NA	-
gene:Zm00001d016893	721.3663504	475.4166287	737.4015086	1025.753257	1685.087746	1673.0832	644.7281626	1461.308068	-1.180726985	0.001696305	0.035307923	-	5	179479278	179480567	-	924	-	NA	-
gene:Zm00001d012231	422.3430826	184.6445709	456.8997583	782.113158	1099.658201	891.4568037	354.6291372	924.4093874	-1.382790313	0.001698967	0.035317978	-	8	170532866	170534989	+	1708	-	NA	Aa_trans
gene:Zm00001d018065	330.6717158	108.7159623	228.4498791	513.8246444	646.4588805	704.7451117	222.6125191	621.6762122	-1.483128517	0.00169992	0.035317978	mTERF_domain_protein7b	5	213694436	213695611	+	1176	-	NA	-
gene:Zm00001d016745	33.83109964	4.314125487	28.91770622	103.3337384	117.5379783	85.11856544	22.35431045	101.9967607	-2.198061684	0.001700964	0.035317978	-	5	174793228	174794175	+	948	-	NA	-
gene:Zm00001d002851	77.48413143	6.90260078	54.94364182	257.8603381	248.638031	164.7456105	46.44345801	223.7479932	-2.272769863	0.001705969	0.035392919	-	2	24692916	24693944	-	1029	-	NA	Glyco_transf_8
gene:Zm00001d020544	4.365303179	138.0520156	138.8049899	15.16825518	11.30172868	5.491520351	93.74076955	10.65383474	3.140174524	0.001708524	0.035416975	-	7	121750712	121753167	-	1996	-	NA	-
gene:Zm00001d013193	2566.798269	6868.087776	3190.58692	8623.153073	13372.20537	12778.76786	4208.490988	11591.37543	-1.461588421	0.00171226	0.035457465	-	5	6175373	6176670	+	1083	-	NA	-
gene:Zm00001d017762	217.1738332	187.2330462	234.2334204	739.4524403	511.9683092	323.9997007	212.8800999	525.1401501	-1.302868072	0.001714355	0.035457465	abscisic_acid_8'-hydroxylase1	5	206138068	206140902	+	2813	-	NA	p450
gene:Zm00001d028941	39.28772861	7.765425877	238.0891145	18.01230303	2.260345736	2.745760176	95.04742301	7.672802981	3.624270362	0.00171467	0.035457465	-	1	52310307	52310813	+	507	-	NA	-
gene:Zm00001d012379	338.3109964	273.5155559	268.9346679	146.9424721	155.9638558	131.7964884	293.5870734	144.9009388	1.018858272	0.001723343	0.035607806	MYB-transcription_factor_36	8	173237609	173239733	+	1931	-	NA	Myb_DNA-binding
gene:Zm00001d025874	61.11424451	62.12340702	81.93350096	30.33651037	16.95259302	10.06778731	68.39038416	19.11896357	1.838500658	0.001738269	0.035886981	-	10	132243700	132247155	+	784	-	NA	-
gene:Zm00001d022153	30.55712226	56.94645643	24.09808852	10.42817544	5.65086434	7.322027135	37.20055574	7.800355638	2.250000601	0.001748576	0.036070418	-	7	171356492	171370857	+	10412	-	NA	-
gene:Zm00001d012423	637.3342642	652.2957737	932.1140638	391.530587	235.0759566	362.4403432	740.5813672	329.6822956	1.166819138	0.001755692	0.036187795	-	8	174293032	174293445	+	414	-	NA	Histone
gene:Zm00001d004578	30.55712226	26.74757802	9.639235407	39.81666986	129.9698798	118.0676876	22.31464523	95.95141241	-2.105028857	0.001758834	0.036195481	-	2	119261511	119268416	+	375	-	NA	Auxin_inducible
gene:Zm00001d031290	507.4664946	100.0877113	654.5040841	1329.118361	1909.992147	1555.930766	420.6860967	1598.347091	-1.926156799	0.001758918	0.036195481	xerico3	1	185334136	185334576	-	441	-	NA	-
gene:Zm00001d044752	60.02291872	1.725650195	91.57273636	406.6988421	384.2587751	260.8472167	51.10710176	350.6016113	-2.780134692	0.001771048	0.036363302	-	9	1245653	1246790	+	1138	-	NA	Glyco_transf_8
gene:Zm00001d024014	2.18265159	0.862825097	4.819617703	13.27222329	40.68622325	17.38981445	2.62169813	23.78275366	-3.186856722	0.001771974	0.036363302	-	10	36972441	36982464	+	1877	-	NA	VWA
gene:Zm00001d032608	998.5631023	2151.885793	3526.032312	724.2841851	841.9787867	231.5591081	2225.493736	599.2740266	1.893174092	0.00177202	0.036363302	alpha-galactosidase1	1	231931416	231934263	-	1268	-	NA	-
gene:Zm00001d029783	254.2789102	67.3003576	217.8467202	51.19286125	56.5086434	51.25418994	179.8086627	52.98523153	1.761905433	0.001773745	0.036363302	-	1	86734087	86736135	+	1649	-	NA	-
gene:Zm00001d005928	181.1600819	62.98623212	93.50058345	397.2186827	316.4484031	261.7624701	112.5489658	325.1431853	-1.53347652	0.001774239	0.036363302	-	2	193091484	193094035	+	1901	-	NA	-
gene:Zm00001d043998	5345.313743	2894.778202	4696.23549	2268.602166	1960.849926	1478.134228	4312.109145	1902.528773	1.180436799	0.001779437	0.036440404	-	3	216138268	216142177	+	3814	-	NA	UQ_con
gene:Zm00001d052261	36.01375123	7.765425877	36.62909455	116.6059617	118.6681511	81.45755188	26.80275722	105.5772216	-1.984240335	0.001790425	0.036613961	-	4	185174497	185177596	-	2461	-	NA	-
gene:Zm00001d004545	101.4932989	170.8393693	257.3675854	79.63333972	51.98795193	43.93216281	176.5667512	58.51781815	1.593516864	0.001791955	0.036613961	-	2	117226282	117229328	-	1709	-	NA	-
gene:Zm00001d003257	691.9005539	591.8980169	1058.388048	422.8151133	313.0578845	246.2031624	780.7288728	327.35872	1.253897415	0.00179238	0.036613961	-	2	38091293	38098388	-	3343	-	NA	-
gene:Zm00001d045565	159.333566	118.2070384	427.9820521	95.74961085	45.20691472	28.37285515	235.1742188	56.44312691	2.058271278	0.001793684	0.036613961	-	9	26893302	26894615	+	1108	-	NA	-
gene:Zm00001d048663	52.38363815	39.68995448	32.77340038	113.7619139	96.06469379	102.5083799	41.61566434	104.1116625	-1.326574684	0.00180302	0.03677495	-	4	2963433	2979198	-	3185	-	NA	NB-ARC
gene:Zm00001d036209	10.91325795	57.80928153	29.88162976	7.584127592	2.260345736	2.745760176	32.86805641	4.196744501	2.96310396	0.001811092	0.036894187	-	6	77184692	77186168	-	891	-	NA	ADH_zinc_N
gene:Zm00001d027955	139.6897017	32.7873537	16.38670019	203.823429	332.2708232	376.1691441	62.95458521	304.0877988	-2.276067203	0.001811775	0.036894187	-	1	18280824	18282397	-	1067	-	NA	K-box
gene:Zm00001d021895	0	0	0	9.48015949	6.781037208	10.9830407	0	9.081412467	-5.674111546	0.001840102	0.037440985	-	7	165558401	165560667	-	2141	-	NA	Glyco_hydro_20
gene:Zm00001d008389	4238.709387	3988.840426	4804.194927	2646.86053	2368.842331	2084.947227	4343.914913	2366.883363	0.876011033	0.001846695	0.037545035	-	8	7021742	7027546	+	2573	-	NA	-
gene:Zm00001d044608	5.456628974	8.628250975	14.45885311	0	0	0	9.514577686	0	5.703743514	0.001863422	0.037854778	asparagine_synthetase2	3	233328410	233331483	-	2258	-	NA	-
gene:Zm00001d028120	13.09590954	2.588475292	73.25818909	2.844047847	0	0	29.64752464	0.948015949	4.936671404	0.001869427	0.037946385	-	1	23432928	23434498	-	1455	-	NA	-
gene:Zm00001d048329	1980.756318	1796.401853	3160.70529	1001.104842	679.2338937	161.084597	2312.621153	613.8077776	1.913788875	0.001871576	0.037959629	-	9	154553978	154561542	-	5516	-	NA	ABC_membrane
gene:Zm00001d033652	2745.7757	3268.381469	2328.839274	1575.602507	1488.437667	1124.846419	2780.998814	1396.295531	0.994129392	0.001874382	0.037986181	-	1	269683309	269688890	-	2412	-	NA	Pkinase
gene:Zm00001d001019	14.18723533	4.314125487	10.60315895	0	0	0	9.701506589	0	5.726470584	0.001891617	0.038304869	-	2	217026924	217027352	+	429	-	NA	-
gene:Zm00001d002350	1235.3808	1193.28711	1340.817645	1803.126335	3589.429029	2875.726157	1256.495185	2756.09384	-1.13313443	0.001903855	0.038521937	kaurene_synthase2	2	10686293	10689881	+	1867	-	NA	-
gene:Zm00001d032517	160.4248918	379.6430429	260.259356	114.7099298	108.4965953	69.55925778	266.7757636	97.58859432	1.452841465	0.001910913	0.038631821	-	1	229147482	229149102	+	727	-	NA	HMA
gene:Zm00001d018499	434.3476663	616.9199447	897.4128164	345.0778055	211.3423263	140.9490223	649.5601425	232.4563847	1.482625472	0.001912331	0.038631821	-	5	221856058	221866963	-	2188	-	NA	Pkinase_Tyr
gene:Zm00001d015227	15.27856113	16.39367685	14.45885311	0.948015949	2.260345736	0	15.37703036	1.069453895	3.914774478	0.001916683	0.038688936	-	5	80071631	80074957	-	1816	-	NA	-
gene:Zm00001d005241	492.1879335	286.4579324	290.1409857	676.8833876	849.8899968	840.2026137	356.2622839	788.9919994	-1.147925093	0.001930572	0.038908326	-	2	165407124	165415539	-	5245	-	NA	-
gene:Zm00001d006521	142.9636791	191.5471716	197.6043258	65.41310048	96.06469379	46.67792299	177.3717255	69.38523909	1.358649432	0.001931331	0.038908326	-	2	210455427	210458297	-	984	-	NA	-
gene:Zm00001d030549	496.5532366	628.136671	572.5705832	917.6794387	1097.397855	1371.049581	565.7534969	1128.708958	-0.996194552	0.001932152	0.038908326	-	1	143230400	143232667	-	1521	-	NA	-
gene:Zm00001d038699	21.8265159	230.374301	1.927847081	2124.503742	1341.515194	2597.489126	84.70955467	2021.169354	-4.575563627	0.001940053	0.039036458	-	6	162814646	162816895	-	1301	-	NA	-
gene:Zm00001d032939	508.5578204	368.4263166	367.254869	688.259579	930.1322704	923.4906724	414.7463353	847.2941739	-1.031105694	0.001947375	0.039152732	-	1	244122165	244125272	-	2561	-	NA	-
gene:Zm00001d021951	635.1516126	125.9724642	433.7655933	1206.824303	1307.610008	1444.269852	398.2965567	1319.568055	-1.72893573	0.001954911	0.03927004	-	7	166927433	166930144	+	1903	-	NA	Arm
gene:Zm00001d048309	64.38822189	9.491076072	28.91770622	99.54167465	188.738869	151.9320631	34.26566806	146.7375356	-2.105483142	0.001956305	0.03927004	bHLH-transcription_factor_97	9	154303194	154304565	-	1136	-	NA	-
gene:Zm00001d038389	1399.079669	1484.059168	1207.796196	806.7615726	749.3046115	636.1011074	1363.645011	730.7224305	0.90020029	0.001970036	0.039493468	-	6	156202742	156209654	-	4497	-	NA	-
gene:Zm00001d050909	86.21473779	35.375829	81.93350096	121.3460415	253.1587224	255.3556963	67.84135592	209.9534868	-1.632353392	0.001970549	0.039493468	-	4	129967527	129968030	-	504	-	NA	-
gene:Zm00001d016342	500.9185398	34.5130039	338.3371628	1149.943346	1578.851497	1519.320631	291.2562355	1416.038491	-2.28224382	0.001976734	0.039571438	-	5	158258923	158259528	-	606	-	NA	-
gene:Zm00001d042848	1712.290172	150.131567	736.4375851	3133.192712	4990.843385	3665.589834	866.2864414	3929.87531	-2.181873062	0.001977558	0.039571438	-	3	181947006	181957835	-	3838	-	NA	-
gene:Zm00001d051460	81.84943461	8.628250975	253.5118912	13.27222329	13.56207442	0	114.6631923	8.944765901	3.686319668	0.001982896	0.039645411	-	4	159428591	159429253	-	663	-	NA	-
gene:Zm00001d028443	478.0006981	538.4028608	602.4522129	309.0531994	279.1526984	210.5082801	539.6185906	266.2380593	1.019744633	0.001985469	0.039645411	-	1	35131038	35136000	-	2473	-	NA	Aminotran_1_2
gene:Zm00001d025818	6.547954769	14.66802666	7.711388325	39.81666986	45.20691472	32.94912211	9.642456584	39.32423556	-2.012960161	0.001985942	0.039645411	-	10	130620785	130623971	+	1681	-	NA	Lipase_GDSL
gene:Zm00001d033505	357.9548607	409.8419213	494.4927764	245.5361308	178.5673132	181.2201716	420.7631861	201.7745385	1.060003467	0.002002803	0.039950564	-	1	264701953	264705087	-	3135	-	NA	GTP_EFTU
gene:Zm00001d000072	291.3839872	208.8036736	157.1195371	390.582571	542.4829767	589.4231844	219.1023993	507.496244	-1.212641508	0.002011835	0.040042213	-	B73V4_ctg10	917444	925264	+	6734	-	NA	-
gene:Zm00001d044541	54.56628974	10.35390117	34.70124746	88.16548326	40.68622325	607.7282522	33.20714613	245.5266529	-2.890366942	0.002011888	0.040042213	-	3	231340374	231341654	-	1179	-	NA	SPX
gene:Zm00001d017441	177.8861046	41.41560468	216.8827967	516.6686922	479.1932961	510.7113927	145.3948353	502.191127	-1.789664725	0.002012132	0.040042213	-	5	195906689	195909170	-	961	-	NA	-
gene:Zm00001d019389	66.57087348	49.18103056	22.17024144	15.16825518	2.260345736	4.576266959	45.97404849	7.33495596	2.634499788	0.002017797	0.040095045	-	7	31384532	31385238	-	707	-	NA	-
gene:Zm00001d032098	734.4622599	756.6976105	721.0148084	1105.386597	1543.816138	2279.896199	737.3915596	1643.032978	-1.155907753	0.002017947	0.040095045	-	1	212613867	212614897	-	928	-	NA	-
gene:Zm00001d023326	185.5253851	212.254974	235.1973439	85.32143541	107.3664225	107.9999002	210.9925677	100.2292527	1.074863104	0.002022808	0.040134037	-	10	3428535	3447268	-	7624	-	NA	NB-ARC
gene:Zm00001d002436	2336.528527	657.4727243	6858.315992	1026.701273	404.6018868	99.76261971	3284.105748	510.3552598	2.685888918	0.002023073	0.040134037	alternative_oxidase2	2	12637877	12640584	+	1411	-	NA	AOX
gene:Zm00001d053358	156.0595887	93.18511053	53.01579474	217.0956523	326.6199589	323.0844473	100.753498	288.9333528	-1.521784601	0.002028052	0.040191609	-	4	227482692	227483909	-	1218	-	NA	-
gene:Zm00001d042373	204.0779236	144.9546164	206.2796377	382.0504275	351.483762	390.8131983	185.1040592	374.7824626	-1.019069624	0.002029143	0.040191609	bHLH-transcription_factor_32	3	163721949	163725152	+	2412	-	NA	HLH
gene:Zm00001d026521	4.365303179	8.628250975	0	32.23254227	38.42587751	30.20336193	4.331184718	33.6205939	-2.940799993	0.002050667	0.040586252	-	10	147481845	147487342	-	1000	-	NA	Peptidase_S24
gene:Zm00001d052654	4.365303179	25.88475292	18.31454727	0.948015949	1.130172868	0	16.18820113	0.692729606	4.596943313	0.002058283	0.040657867	-	4	196019083	196022515	-	1215	-	NA	-
gene:Zm00001d016019	409.2471731	69.0260078	106.995513	642.7548135	977.5995309	705.6603651	195.0895646	775.3382365	-1.992256147	0.002058832	0.040657867	-	5	139873801	139874670	+	870	-	NA	DUF295
gene:Zm00001d013821	197.5299689	226.0601755	193.7486317	36.97262201	71.20089069	109.830407	205.779592	72.66797324	1.501143398	0.002059093	0.040657867	-	5	21432540	21439074	-	5900	-	NA	-
gene:Zm00001d007054	14.18723533	16.39367685	1.927847081	0	0	0	10.83625309	0	5.890217897	0.002062725	0.040697924	-	2	220967519	220968785	+	1170	-	NA	-
gene:Zm00001d018049	365.5941413	625.5481957	498.3484705	254.0682743	238.4664752	166.5761173	496.4969358	219.7036223	1.177265217	0.002064638	0.040704018	-	5	213151971	213160764	+	5257	-	NA	-
gene:Zm00001d047955	1652.267253	1489.236118	1331.17841	881.6548326	818.2451565	759.6603153	1490.893927	819.8534348	0.862680896	0.002084778	0.041030632	-	9	146097906	146100939	-	2933	-	NA	-
gene:Zm00001d007839	343.7676254	461.6114272	466.5389937	237.9520032	206.8216349	177.559158	423.9726821	207.4442654	1.031835249	0.002085017	0.041030632	-	2	240606690	240609986	+	1542	-	NA	RRM_1
gene:Zm00001d011720	1555.139258	999.1514629	2151.477343	671.1952919	741.3934014	660.8129489	1568.589354	691.1338808	1.182422143	0.002086599	0.041030632	violaxanthin_de-epoxidase3	8	159835548	159840848	+	4358	-	NA	-
gene:Zm00001d043423	99.31064733	23.29627763	70.36641847	171.5908868	261.0699325	212.3387869	64.32444781	214.9998687	-1.744747913	0.002087674	0.041030632	-	3	199284014	199285462	-	1305	-	NA	TCP
gene:Zm00001d027708	190.9820141	85.41968465	410.6314283	72.04921213	58.76898914	61.32197726	229.0110424	64.04672617	1.837477444	0.002091276	0.041069617	-	1	11664783	11666908	-	1901	-	NA	HMA
gene:Zm00001d018098	1046.581437	1861.113735	1204.904426	729.0242648	609.1631759	558.304569	1370.866533	632.1640032	1.116940211	0.002094721	0.041105463	-	5	214145696	214154284	+	5505	-	NA	-
gene:Zm00001d053301	491.0966077	395.1738946	493.5288528	744.19252	901.8779487	1230.100559	459.9331184	958.7236758	-1.060087722	0.002096358	0.041105783	-	4	225026663	225038512	-	2709	-	NA	Pyr_redox_2
gene:Zm00001d043880	1587.879031	1509.081095	1387.085975	2269.550182	3175.785759	2999.285365	1494.682034	2814.873769	-0.913210038	0.002101398	0.041152374	-	3	212730430	212732771	-	1840	-	NA	-
gene:Zm00001d052107	70.93617666	44.86690507	8.675311866	154.5265997	94.93452092	400.8809856	41.49279787	216.7807021	-2.388116983	0.002101978	0.041152374	-	4	179834335	179840234	-	5392	-	NA	-
gene:Zm00001d020442	56.74894133	81.96838426	63.61895369	27.49246252	24.8638031	18.30506784	67.44542643	23.55377782	1.521472965	0.00211548	0.041380215	-	7	114645029	114645828	-	688	-	NA	-
gene:Zm00001d052390	7.639280564	7.765425877	22.17024144	0.948015949	0	0	12.52498263	0.316005316	5.137411618	0.002116877	0.041380215	-	4	188973669	188975433	+	1515	-	NA	NAM
gene:Zm00001d043197	113.4978827	175.1534948	61.6911066	47.40079745	15.82242015	6.406773743	116.780828	23.20999712	2.329940118	0.002119066	0.041389526	-	3	191270207	191271106	-	900	-	NA	NB-ARC
gene:Zm00001d037689	1036.759505	221.7460501	1364.915734	230.3678756	302.8863286	113.4914206	874.4737629	215.581875	2.020635778	0.002120616	0.041389526	hexokinase7	6	134063370	134066401	+	2072	-	NA	-
gene:Zm00001d012430	2.18265159	92.32228543	153.263843	12.32420734	0	0.915253392	82.58959333	4.413153576	4.215407702	0.002123702	0.041401402	-	8	174360496	174361131	+	636	-	NA	-
gene:Zm00001d000381	27.28314487	23.29627763	13.49492957	66.36111643	76.85175503	53.99995012	21.35811736	65.73760719	-1.623114878	0.002124488	0.041401402	-	B73V4_ctg24	21822	27498	-	2637	-	NA	U-box
gene:Zm00001d033115	51.29231236	126.8352893	36.62909455	4.740079745	18.08276589	20.13557462	71.58556541	14.31947342	2.32624071	0.002136675	0.041579368	-	1	250573058	250576220	+	393	-	NA	-
gene:Zm00001d036873	0	2.588475292	0.963923541	3.792063796	37.29570465	22.8813348	1.184132944	21.32303441	-4.110271219	0.002136897	0.041579368	-	6	105374546	105374877	+	249	-	NA	-
gene:Zm00001d011756	517.2884267	619.50842	796.2008446	337.4936779	324.3596131	305.6946329	644.3325638	322.5159746	0.99869643	0.002155843	0.041915856	-	8	160818522	160825421	+	5431	-	NA	-
gene:Zm00001d009432	15.27856113	0	38.55694163	0	0	0	17.94516758	0	6.616662195	0.002166723	0.042095148	-	8	64114105	64166430	-	597	-	NA	-
gene:Zm00001d014772	1952.381847	1660.075488	2239.194385	1094.010405	918.8305417	1107.456604	1950.550573	1040.099184	0.906929791	0.002175324	0.042229908	-	5	62615830	62617900	-	791	-	NA	-
gene:Zm00001d050671	3.273977384	27.61040312	3.855694163	0	0	0	11.58002489	0	5.990968754	0.002182566	0.042338111	-	4	114726415	114726789	-	375	-	NA	-
gene:Zm00001d028866	61.11424451	8.628250975	36.62909455	203.823429	161.6147201	93.35584597	35.45719668	152.9313317	-2.11502018	0.002184538	0.042343988	-	1	48956482	48959493	-	2507	-	NA	-
gene:Zm00001d028548	2842.903696	1903.392165	3487.47537	4781.792447	6480.411225	6528.502444	2744.59041	5930.235372	-1.111553088	0.002189057	0.042347984	-	1	38916237	38917464	-	940	-	NA	-
gene:Zm00001d017146	104.7672763	131.1494148	56.8714889	197.1873174	304.0165015	262.6777235	97.59606001	254.6271808	-1.382195726	0.00218969	0.042347984	-	5	186848205	186851779	-	1434	-	NA	-
gene:Zm00001d035294	5.456628974	0	0	19.90833493	23.73363023	31.11861532	1.818876325	24.92019349	-3.847669438	0.002191365	0.042347984	-	6	19588220	19593139	-	1588	-	NA	FMO-like
gene:Zm00001d018749	22.91784169	0	20.24239435	112.8138979	126.5793612	75.96603153	14.38674535	105.1197636	-2.877848002	0.002191643	0.042347984	-	7	4084558	4086428	-	1734	-	NA	-
gene:Zm00001d023344	46.92700918	6.039775682	12.53100603	0.948015949	1.130172868	2.745760176	21.83259696	1.607982998	3.740433501	0.002193089	0.042347984	umc1318	10	3840240	3855248	-	8500	-	NA	-
gene:Zm00001d021413	1634.806041	1130.300878	2610.304948	638.9627497	935.7831348	442.9826417	1791.803956	672.5761754	1.413977862	0.00221606	0.042729333	-	7	151517790	151529322	-	3887	-	NA	-
gene:Zm00001d028230	1669.728466	2069.054584	4579.600742	1345.234632	741.3934014	397.2199721	2772.794597	827.9493351	1.743737597	0.002216206	0.042729333	-	1	27307350	27313346	-	2050	-	NA	Sugar_tr
gene:Zm00001d046508	163.6988692	199.3125975	204.3517906	426.6071771	384.2587751	320.3386872	189.1210858	377.0682131	-0.994634925	0.002226375	0.042868081	phospholipase_D6	9	93066048	93070157	+	3221	-	NA	C2
gene:Zm00001d035621	32.73977384	2.588475292	2.891770622	0	0	0	12.74000659	0	6.117839336	0.002226782	0.042868081	-	6	37468979	37471351	-	1341	-	NA	Asp
gene:Zm00001d014377	1317.230234	1164.813882	960.0678465	501.500437	702.9675239	523.5249402	1147.370654	575.9976337	0.994569582	0.002229776	0.042893177	ARF-transcription_factor_18	5	43566076	43572737	+	4585	-	NA	-
gene:Zm00001d034050	378.6900508	511.6552828	611.1275248	288.1968485	187.6086961	200.4404928	500.4909528	225.4153458	1.150520756	0.002233932	0.042940574	-	1	282500016	282508569	+	1717	-	NA	Mito_carr
gene:Zm00001d014456	125.5024664	138.0520156	85.78919512	351.7139171	211.3423263	257.1862031	116.4478924	273.4141488	-1.231691793	0.002236165	0.042950949	-	5	48034203	48043502	+	3380	-	NA	ANF_receptor
gene:Zm00001d038072	58.93159292	155.3085175	85.78919512	34.12857417	35.03535891	13.72880088	100.0097685	27.63091132	1.861875915	0.002245146	0.043090846	-	6	146915089	146916918	-	1830	-	NA	Pkinase
gene:Zm00001d011679	30.55712226	96.63641092	112.7790543	224.6797799	241.8569938	269.9997506	79.99086248	245.5121748	-1.615046982	0.002248199	0.043116434	-	8	158415720	158417282	+	1563	-	NA	MFS_1
gene:Zm00001d041965	531.4756621	613.4686443	985.1298586	341.2857417	194.3897333	64.06773743	710.0247217	199.9144041	1.828692743	0.002249878	0.043116434	-	3	145917160	145918577	-	991	-	NA	-
gene:Zm00001d040308	7.639280564	8.628250975	65.54680077	0.948015949	0	3.661013567	27.2714441	1.536343172	4.10829838	0.002256462	0.043209978	-	3	37004302	37006317	-	1159	-	NA	-
gene:Zm00001d034163	3.273977384	0	4.819617703	16.11627113	29.38449457	26.54234836	2.697865029	24.01437136	-3.178398961	0.002259502	0.043235561	C2C2-Dof-transcription_factor_25	1	285470390	285471475	-	1086	-	NA	zf-Dof
gene:Zm00001d041365	4893.504864	9042.407022	4804.194927	13189.7459	12578.82402	16391.273	6246.702271	14053.28097	-1.169696076	0.002277574	0.043548514	-	3	114433709	114437553	-	2443	-	NA	-
gene:Zm00001d038623	169.1554982	384.8199935	443.4048287	166.850807	64.41985348	47.59317638	332.4601068	92.9546123	1.838249499	0.002308679	0.044110015	-	6	161118605	161123856	-	2500	-	NA	-
gene:Zm00001d016103	127.685118	184.6445709	484.853541	110.917866	50.85777906	26.54234836	265.7277433	62.77266449	2.081585927	0.002315662	0.044210149	-	5	144624966	144629583	+	1543	-	NA	-
gene:Zm00001d042153	13.09590954	6.039775682	0	37.92063796	47.46726046	51.25418994	6.37856174	45.54736279	-2.850967434	0.002317969	0.044214412	-	3	153913130	153917438	+	1779	-	NA	PIP5K
gene:Zm00001d038522	2152.094467	2066.466108	2190.034284	1338.59852	851.0201697	578.4401437	2136.198287	922.6862778	1.211115318	0.00231937	0.044214412	-	6	159140146	159146205	-	3563	-	NA	Pkinase_Tyr
gene:Zm00001d014158	244.456978	329.5991872	160.0113078	466.4238469	624.985596	605.8977454	244.6891577	565.7690628	-1.208531893	0.002333956	0.044459051	-	5	34480783	34484281	-	3086	-	NA	-
gene:Zm00001d036797	34.92242543	45.72973017	53.01579474	18.01230303	9.041382944	8.237280527	44.55598345	11.7636555	1.918569976	0.002346629	0.044666921	-	6	101216563	101220048	-	1796	-	NA	-
gene:Zm00001d021444	1291.038415	797.2503901	1551.916901	2340.651378	2351.889738	4233.962191	1213.401902	2975.501102	-1.294270354	0.00235182	0.044732174	-	7	152348851	152351171	+	1764	-	NA	FMO-like
gene:Zm00001d014609	631.8776352	760.1489109	590.8851304	370.6742361	360.5251449	332.2369812	660.9705588	354.4787874	0.899238032	0.002389557	0.045371289	-	5	55126809	55131272	-	3327	-	NA	-
gene:Zm00001d050798	16.36988692	0.862825097	333.5175451	0	0	0	116.9167524	0	9.321334027	0.002391344	0.045371289	-	4	123592234	123595083	-	1095	-	NA	-
gene:Zm00001d040637	8.730606359	7.765425877	5.783541244	25.59643062	27.12414883	42.10165603	7.426524493	31.60741183	-2.094168292	0.002392518	0.045371289	-	3	55365116	55366450	+	1015	-	NA	HMA
gene:Zm00001d026164	2.18265159	0	0	35.07659011	1.130172868	32.94912211	0.72755053	23.0519617	-5.081906655	0.002393824	0.045371289	-	10	140160681	140165357	+	3116	-	NA	-
gene:Zm00001d017338	930.900903	440.0407997	377.8580279	230.3678756	257.6794139	165.6608639	582.9332436	217.9027178	1.419682503	0.002394362	0.045371289	-	5	193306261	193315128	-	1482	-	NA	Proteasome
gene:Zm00001d035390	2075.701662	1274.392669	1439.137846	2398.480351	3817.723948	5435.689894	1596.410726	3883.964731	-1.282851653	0.002397489	0.045396625	resistance_to_sugarcane_mosaic_virus1	6	24034207	24035363	-	723	-	NA	-
gene:Zm00001d038481	6.547954769	7.765425877	13.49492957	49.29682935	37.29570465	27.45760176	9.269436739	38.01671192	-2.033082958	0.002404075	0.045487395	-	6	158357164	158361534	+	3161	-	NA	Pkinase_Tyr
gene:Zm00001d003509	183.3427335	132.875065	129.1657545	314.7412951	341.3122062	268.1692438	148.4611843	308.0742484	-1.05423432	0.002408304	0.045508518	-	2	46242467	46247628	+	2399	-	NA	PP2C
gene:Zm00001d006939	205.1692494	421.9214727	172.5423138	118.5019936	92.67417518	79.62704509	266.5443453	96.93440463	1.460207013	0.002408779	0.045508518	-	2	219891537	219894633	-	1150	-	NA	-
gene:Zm00001d026442	62.20557031	43.14125487	42.41263579	10.42817544	5.65086434	20.13557462	49.25315366	12.07153813	2.013790578	0.002418563	0.045659375	-	10	145903057	145906518	-	1425	-	NA	DUF6
gene:Zm00001d038993	12.00458374	1.725650195	14.45885311	80.58135567	110.7569411	12.81354749	9.396362349	68.05061474	-2.863696532	0.002422513	0.045674267	-	6	168345096	168345887	-	672	-	NA	-
gene:Zm00001d032854	41.4703802	12.94237646	100.2480482	8.532143541	7.911210076	10.06778731	51.55360163	8.837046976	2.541087506	0.002422952	0.045674267	-	1	240356665	240358382	+	1378	-	NA	-
gene:Zm00001d027837	3.273977384	0	6.747464785	17.06428708	33.90518604	35.69488228	3.340480723	28.88811847	-3.128480843	0.002439129	0.045945085	male_sterile26	1	14702216	14704540	-	1931	-	NA	p450
gene:Zm00001d014958	664.6174091	141.503316	924.4026755	1816.398558	2140.547412	2224.980996	576.8411335	2060.642322	-1.837145841	0.002447558	0.046058699	-	5	70273022	70274609	-	1524	-	NA	p450
gene:Zm00001d007113	556.5761554	458.1601268	429.9098991	740.4004562	1032.978001	1133.998953	481.5487271	969.1258034	-1.009269414	0.002448791	0.046058699	-	2	222491159	222495761	-	2232	-	NA	-
gene:Zm00001d029475	224.8131137	83.69403446	156.1556136	354.5579649	421.5544798	411.8640263	154.8875873	395.992157	-1.356372129	0.002451122	0.046068375	-	1	72345031	72345957	-	927	-	NA	-
gene:Zm00001d045589	116.77186	23.29627763	72.29426555	182.9670782	304.0165015	251.6946828	70.78746774	246.2260875	-1.802032085	0.002481274	0.046600568	GRAS-transcription_factor_32	9	27423699	27425201	-	1503	-	NA	GRAS
gene:Zm00001d054000	166.9728466	20.70780234	319.058692	36.02460606	31.64484031	25.62709497	168.9131136	31.09884711	2.441087234	0.002489731	0.046724804	-	4	244877193	244879409	+	1950	-	NA	-
gene:Zm00001d029149	3913.4943	2361.552292	3422.892493	1552.850125	1790.193823	1502.846069	3232.646362	1615.296672	1.000896454	0.002497597	0.046837798	-	1	60531179	60535397	+	1807	-	NA	CCT
gene:Zm00001d033995	399.4252409	113.8929129	283.393521	560.2774259	893.9667386	874.9822426	265.5705582	776.4088024	-1.548806429	0.002500282	0.046853521	-	1	280610045	280612130	-	1859	-	NA	-
gene:Zm00001d005899	204.0779236	137.1891905	209.1714083	86.26945136	53.1181248	87.86432562	183.4795075	75.75063393	1.272593161	0.002504272	0.046865308	-	2	192214109	192221811	+	3830	-	NA	DnaJ
gene:Zm00001d038860	50.20098656	25.02192783	36.62909455	127.0341372	88.15348371	89.6948324	37.28400298	101.6274844	-1.453001104	0.002504606	0.046865308	-	6	165996710	165998543	-	1758	-	NA	-
gene:Zm00001d024349	0	0.862825097	0.963923541	11.37619139	10.17155581	17.38981445	0.608916213	12.97918722	-4.361633626	0.002506837	0.046872492	math-btb27	10	66046841	66047920	-	1080	-	NA	BTB
gene:Zm00001d022424	10.91325795	8.628250975	32.77340038	71.10119618	88.15348371	52.16944334	17.4383031	70.47470774	-2.01404101	0.002512704	0.046947589	NAC-transcription_factor_122	7	177373961	177376027	+	1440	-	NA	NAM
gene:Zm00001d026573	3659.21539	4591.092344	3611.821507	2169.060491	2254.694872	2224.980996	3954.04308	2216.245453	0.835279283	0.00253045	0.047194965	-	10	148202959	148206353	-	1760	-	NA	APH
gene:Zm00001d031518	147.3289823	257.1218791	106.995513	83.42540352	36.16553178	43.93216281	170.4821248	54.50769937	1.64384239	0.002531036	0.047194965	-	1	192615422	192622594	+	3355	-	NA	-
gene:Zm00001d018719	45.83568338	17.25650195	61.6911066	123.2420734	140.1414356	126.3049681	41.59443065	129.896159	-1.646424793	0.002531524	0.047194965	-	7	3078149	3082707	-	2066	-	NA	-
gene:Zm00001d011119	3378.744661	2891.326902	2600.665713	1619.211241	1634.229967	1714.269603	2956.912425	1655.903604	0.836393625	0.002534359	0.04721313	-	8	139412828	139416792	-	3732	-	NA	-
gene:Zm00001d002434	342.6762996	342.5415637	1644.45356	241.744067	133.3603984	20.13557462	776.5571412	131.74668	2.559548228	0.002536615	0.047220501	alternative_oxidase3	2	12564577	12567196	+	2511	-	NA	AOX
gene:Zm00001d027948	108.0412537	112.1672627	870.4229572	24.64841468	3.390518604	0	363.5438245	9.346311093	5.279691884	0.002547535	0.047389	hydroxycinnamoyltransferase2	1	18147157	18148937	+	1700	-	NA	-
gene:Zm00001d051502	1430.728117	1730.827146	1323.467021	916.7314227	724.4408084	749.5925279	1495.007428	796.9215864	0.907614277	0.00255748	0.047539147	calcium_dependent_protein_kinase7	4	160498471	160504465	-	3857	-	NA	Pkinase
gene:Zm00001d048085	39.28772861	28.47322822	86.75311866	145.9944562	137.8810899	183.9659318	51.50469183	155.9471593	-1.599411226	0.002562293	0.047593745	-	9	149821917	149824839	+	1609	-	NA	-
gene:Zm00001d040326	277.1967519	806.7414661	665.1072431	178.2269984	275.7621798	174.8133978	583.0151537	209.6008587	1.477222087	0.002564562	0.047601045	-	3	38299877	38304645	-	687	-	NA	-
gene:Zm00001d003195	2097.528178	2520.31211	1858.444586	2871.54031	7014.982992	5653.520202	2158.761625	5180.014501	-1.262671528	0.002570426	0.047675013	double_B-box_zinc_finger_protein1	2	35306395	35307301	+	444	-	NA	-
gene:Zm00001d033681	0	9.491076072	42.41263579	0	0	0	17.30123729	0	6.565792839	0.0025736	0.047699007	-	1	270976200	270977795	+	717	-	NA	-
gene:Zm00001d040500	8.730606359	44.86690507	0	0	0	0	17.86583714	0	6.613543773	0.002578221	0.047749788	bZIP-transcription_factor_42	3	47004098	47005326	-	812	-	NA	bZIP_1
gene:Zm00001d013461	0	0	0	9.48015949	2.260345736	18.30506784	0	10.01519102	-5.817993443	0.002589838	0.047929942	-	5	12111433	12113050	-	1222	-	NA	-
gene:Zm00001d025287	0	0	0	7.584127592	16.95259302	3.661013567	0	9.399244727	-5.716644855	0.00260358	0.04814915	male-gametophyte_specific1	10	112727580	112728092	-	513	-	NA	-
gene:Zm00001d030103	697.3571829	291.6348829	383.6415692	840.8901468	1578.851497	1161.456554	457.544545	1193.732733	-1.384048982	0.002606884	0.048175142	-	1	105862947	105867700	-	1258	-	NA	-
gene:Zm00001d004553	61.11424451	33.6501788	57.83541244	102.3857225	119.798324	199.5252394	50.86661192	140.569762	-1.470529114	0.002616365	0.048315164	-	2	117599896	117603633	+	2636	-	NA	VWA
gene:Zm00001d007819	1097.87375	2956.038784	3120.220501	913.8873749	1017.155581	818.2365323	2391.377678	916.4264962	1.383952803	0.002625158	0.048419698	-	2	240252323	240254144	+	1718	-	NA	-
gene:Zm00001d008176	1509.303574	2090.625211	2364.504445	1203.980255	834.0675766	824.6433061	1988.14441	954.2303793	1.059005858	0.002625843	0.048419698	SBP-transcription_factor_9	8	327598	335271	-	4745	-	NA	SBP
gene:Zm00001d029560	211.7172042	127.6981144	95.42843053	290.0928804	361.6553178	410.948773	144.9479164	354.2323237	-1.290915692	0.002628832	0.04843961	-	1	76209755	76212824	-	2981	-	NA	-
gene:Zm00001d051490	56.74894133	14.66802666	1.927847081	114.7099298	152.5733372	179.3896648	24.44827169	148.8909773	-2.613805969	0.002633799	0.048495927	-	4	160320340	160323058	-	1274	-	NA	-
gene:Zm00001d048271	519.4710783	802.4273407	811.6236213	385.8424913	352.6139348	250.7794294	711.1740134	329.7452852	1.109480342	0.002637328	0.048525685	-	9	153586355	153591283	+	1122	-	NA	Proteasome
gene:Zm00001d018247	779.2066175	207.9408485	332.5536215	1013.42905	1461.313518	1491.863029	439.9003625	1322.201866	-1.588488166	0.002647584	0.048679086	-	5	217371258	217372112	-	855	-	NA	-
gene:Zm00001d030086	3.273977384	4.314125487	9.639235407	31.28452632	19.21293876	39.35589585	5.742446093	29.95112031	-2.381734885	0.002673377	0.049098682	-	1	104416569	104417982	-	1318	-	NA	-
gene:Zm00001d010493	332.8543674	276.9668563	266.0428972	457.8917034	681.4942394	606.8129988	291.954707	582.0663139	-0.995599895	0.002674275	0.049098682	-	8	117899468	117903017	+	987	-	NA	F-box
gene:Zm00001d015326	121.1371632	254.5334038	190.8568611	69.20516428	81.3724465	80.54229848	188.842476	77.03996976	1.29547059	0.002687588	0.04930743	-	5	84614161	84619449	+	4908	-	NA	FH2
gene:Zm00001d018252	30.55712226	1.725650195	2.891770622	38.86865391	107.3664225	120.8134477	11.72484769	89.0161747	-2.940863519	0.002690201	0.049319704	-	5	217430344	217431734	+	961	-	NA	-
gene:Zm00001d013501	8.730606359	0	0	28.44047847	36.16553178	43.93216281	2.91020212	36.17939102	-3.685095237	0.002695446	0.049380184	CCAAT-HAP2-transcription_factor_21	5	12924588	12927450	-	1171	-	NA	-
gene:Zm00001d040958	4.365303179	0	0	16.11627113	5.65086434	64.98299082	1.45510106	28.91670877	-4.38148865	0.002700375	0.049428762	-	3	83071425	83074361	+	1677	-	NA	-
gene:Zm00001d003091	165.8815208	83.69403446	856.9280277	99.54167465	55.37847054	10.06778731	368.8345276	54.9959775	2.745954477	0.002701994	0.049428762	-	2	31872015	31873109	-	1095	-	NA	Glyco_transf_29
gene:Zm00001d009594	635.1516126	660.0611996	686.313561	421.8670973	301.7561558	253.5251895	660.508791	325.7161475	1.019897954	0.002712259	0.049569687	-	8	72096954	72103235	+	2531	-	NA	Asp
gene:Zm00001d032901	0	4.314125487	0	7.584127592	22.60345736	45.76266959	1.438041829	25.31675152	-4.074895707	0.002713605	0.049569687	-	1	242207853	242212973	-	2215	-	NA	-
gene:Zm00001d029106	938.5401836	1782.596651	1506.612494	766.9449028	618.2045588	550.0672885	1409.249776	645.07225	1.12760667	0.002724455	0.049732084	-	1	58272364	58278067	+	1666	-	NA	-
gene:Zm00001d031300	5763.291522	830.9005689	1773.619315	945.1719012	698.4468325	461.2877095	2789.270469	701.6354811	1.991000898	0.002727203	0.049746459	-	1	185589046	185592963	+	2786	-	NA	-
gene:Zm00001d034667	666.8000606	745.4808842	1692.649737	461.6837672	397.8208496	326.7454609	1034.976894	395.4166925	1.388256068	0.002730461	0.049770102	-	1	299308121	299311210	+	1636	-	NA	-
