# Supplementary material for: A Maize Necrotic Leaf Mutant Caused by Defect of Coproporphyrinogen III Oxidase in the Porphyrin Pathway
Source: Genes (Basel). 2022 Jan 29;13(2):272. doi: 10.3390/genes13020272 (PMC8872553; doi:10.3390/genes13020272)
Supplement: Supplementary file 1 [file genes-13-00272-s001.zip › Excel S2.xls]

## Sheet: Sheet1
KEGGID	Description	GeneRatio	BgRatio	pvalue	padj	geneID	geneName	keggID	Count	Up	Up_Gene_id	Down	Down_Gene_id
zma04141	Protein processing in endoplasmic reticulum	20/175	182/3408	0.000827121	0.0628612	gene:Zm00001d024903/gene:Zm00001d052194/gene:Zm00001d012420/gene:Zm00001d028561/gene:Zm00001d042922/gene:Zm00001d039566/gene:Zm00001d008841/gene:Zm00001d047542/gene:Zm00001d028630/gene:Zm00001d028408/gene:Zm00001d039933/gene:Zm00001d044874/gene:Zm00001d021634/gene:Zm00001d041719/gene:Zm00001d014124/gene:Zm00001d028557/gene:Zm00001d017476/gene:Zm00001d047799/gene:Zm00001d043998/gene:Zm00001d034667	heat_shock_protein%2C_90_kDa/heat_shock_protein22/heat_shock_protein1/-/-/heat_shock_protein18f/heat_shock_protein18c/-/-/heat_shock_protein26/-/-/-/-/-/-/-/-/-/-	zma:100196928/zma:542602/zma:100501536/zma:100191552/zma:103651028/zma:542723/zma:100037778/zma:100383105/zma:100281806/zma:542576/zma:100280576/zma:100276133/zma:103633231/zma:100286003/zma:100382880/zma:103634220/zma:100216704/zma:100272911/zma:100280571/zma:100279983	20	19	gene:Zm00001d024903/gene:Zm00001d052194/gene:Zm00001d012420/gene:Zm00001d028561/gene:Zm00001d042922/gene:Zm00001d039566/gene:Zm00001d008841/gene:Zm00001d047542/gene:Zm00001d028630/gene:Zm00001d028408/gene:Zm00001d039933/gene:Zm00001d044874/gene:Zm00001d041719/gene:Zm00001d014124/gene:Zm00001d028557/gene:Zm00001d017476/gene:Zm00001d047799/gene:Zm00001d043998/gene:Zm00001d034667	1	gene:Zm00001d021634
zma00591	Linoleic acid metabolism	4/175	12/3408	0.00240329	0.0913249	gene:Zm00001d042541/gene:Zm00001d042540/gene:Zm00001d002000/gene:Zm00001d013461	lipoxygenase1/-/lipoxygenase6/-	zma:541856/zma:100037802/zma:100037805/zma:100191566	4	3	gene:Zm00001d042541/gene:Zm00001d042540/gene:Zm00001d002000	1	gene:Zm00001d013461
zma00480	Glutathione metabolism	9/175	69/3408	0.00795438	0.201511	gene:Zm00001d029696/gene:Zm00001d029699/gene:Zm00001d027557/gene:Zm00001d026154/gene:Zm00001d007661/gene:Zm00001d024839/gene:Zm00001d018454/gene:Zm00001d018809/gene:Zm00001d029708	glutathione_transferase34/glutathione_transferase42/glutathione_transferase31/-/-/glutathione_S-transferase2/-/glutathione_transferase6/glutathione_transferase30	zma:542634/zma:541850/zma:541842/zma:100280060/zma:100273590/zma:542311/zma:100273659/zma:541991/zma:541841	9	9	gene:Zm00001d029696/gene:Zm00001d029699/gene:Zm00001d027557/gene:Zm00001d026154/gene:Zm00001d007661/gene:Zm00001d024839/gene:Zm00001d018454/gene:Zm00001d018809/gene:Zm00001d029708	0
zma00040	Pentose and glucuronate interconversions	6/175	40/3408	0.0150489	0.225767	gene:Zm00001d042869/gene:Zm00001d036158/gene:Zm00001d025588/gene:Zm00001d042556/gene:Zm00001d014674/gene:Zm00001d007113	-/-/pectin_methylesterase1/-/-/-	zma:100037812/zma:100284055/zma:542462/zma:100273291/zma:100382378/zma:100194385	6	3	gene:Zm00001d042869/gene:Zm00001d042556/gene:Zm00001d014674	3	gene:Zm00001d036158/gene:Zm00001d025588/gene:Zm00001d007113
zma00350	Tyrosine metabolism	4/175	21/3408	0.0202345	0.225767	gene:Zm00001d024665/gene:Zm00001d024664/gene:Zm00001d025103/gene:Zm00001d014659	-/-/-/-	zma:100383025/zma:100279950/zma:103641531/zma:100284546	4	2	gene:Zm00001d024665/gene:Zm00001d024664	2	gene:Zm00001d025103/gene:Zm00001d014659
zma00950	Isoquinoline alkaloid biosynthesis	3/175	12/3408	0.0207726	0.225767	gene:Zm00001d024665/gene:Zm00001d024664/gene:Zm00001d025103	-/-/-	zma:100383025/zma:100279950/zma:103641531	3	2	gene:Zm00001d024665/gene:Zm00001d024664	1	gene:Zm00001d025103
zma00360	Phenylalanine metabolism	4/175	22/3408	0.023765	0.225767	gene:Zm00001d024665/gene:Zm00001d024664/gene:Zm00001d025103/gene:Zm00001d014659	-/-/-/-	zma:100383025/zma:100279950/zma:103641531/zma:100284546	4	2	gene:Zm00001d024665/gene:Zm00001d024664	2	gene:Zm00001d025103/gene:Zm00001d014659
zma00906	Carotenoid biosynthesis	4/175	22/3408	0.023765	0.225767	gene:Zm00001d051556/gene:Zm00001d020717/gene:Zm00001d013689/gene:Zm00001d017762	nine-cis-epoxycarotenoid_dioxygenase6/abscisic_acid_8'-hydroxylase4/nine-cis-epoxycarotenoid_dioxygenase9/abscisic_acid_8'-hydroxylase1	zma:100501454/zma:100191697/zma:103626043/zma:100383693	4	0		4	gene:Zm00001d051556/gene:Zm00001d020717/gene:Zm00001d013689/gene:Zm00001d017762
zma04075	Plant hormone signal transduction	15/175	180/3408	0.0408468	0.344928	gene:Zm00001d014682/gene:Zm00001d045203/gene:Zm00001d010411/gene:Zm00001d043515/gene:Zm00001d014253/gene:Zm00001d022550/gene:Zm00001d019734/gene:Zm00001d012731/gene:Zm00001d014774/gene:Zm00001d022542/gene:Zm00001d048263/gene:Zm00001d039624/gene:Zm00001d003903/gene:Zm00001d013412/gene:Zm00001d004578	-/Aux/IAA-transcription_factor_41/Aux/IAA-transcription_factor_38/Aux/IAA-transcription_factor_12/ZIM-transcription_factor_10/bZIP-transcription_factor_92/AP2-EREBP-transcription_factor_177/ARF-transcription_factor_26/-/bZIP-transcription_factor_54/ZIM-transcription_factor_4/Aux/IAA-transcription_factor_8/ZIM-transcription_factor_33/-/-	zma:103626407/zma:107522023/zma:100274569/zma:100283620/zma:100286212/zma:100191211/zma:100191919/zma:100502387/zma:107436075/zma:100279481/zma:100284433/zma:100193444/zma:100274370/zma:732835/zma:103643117	15	6	gene:Zm00001d043515/gene:Zm00001d014253/gene:Zm00001d019734/gene:Zm00001d022542/gene:Zm00001d048263/gene:Zm00001d003903	9	gene:Zm00001d014682/gene:Zm00001d045203/gene:Zm00001d010411/gene:Zm00001d022550/gene:Zm00001d012731/gene:Zm00001d014774/gene:Zm00001d039624/gene:Zm00001d013412/gene:Zm00001d004578
zma00592	alpha-Linolenic acid metabolism	4/175	33/3408	0.0862093	0.621535	gene:Zm00001d044906/gene:Zm00001d044908/gene:Zm00001d006069/gene:Zm00001d013461	12-oxo-phytodienoic_acid_reductase2/12-oxo-phytodienoic_acid_reductase1/-/-	zma:732822/zma:732815/zma:103647563/zma:100191566	4	3	gene:Zm00001d044906/gene:Zm00001d044908/gene:Zm00001d006069	1	gene:Zm00001d013461
zma00590	Arachidonic acid metabolism	2/175	10/3408	0.0899591	0.621535	gene:Zm00001d026154/gene:Zm00001d013461	-/-	zma:100280060/zma:100191566	2	1	gene:Zm00001d026154	1	gene:Zm00001d013461
zma00860	Porphyrin and chlorophyll metabolism	4/175	35/3408	0.102066	0.646419	gene:Zm00001d002358/gene:Zm00001d019758/gene:Zm00001d027656/gene:Zm00001d030549	necrotic4/chlorophyllase1/lethal_leaf_spot1/-	zma:100500945/zma:103632406/zma:103631716/zma:100272914	4	2	gene:Zm00001d019758/gene:Zm00001d027656	2	gene:Zm00001d002358/gene:Zm00001d030549
zma00010	Glycolysis / Gluconeogenesis	8/175	95/3408	0.11234	0.646876	gene:Zm00001d051001/gene:Zm00001d008816/gene:Zm00001d012407/gene:Zm00001d014945/gene:Zm00001d042869/gene:Zm00001d008651/gene:Zm00001d028471/gene:Zm00001d034617	glyceraldehyde-3-phosphate_dehydrogenase3/-/triose_phosphate_isomerase5/-/-/pyruvate_decarboxylase2/phosphoenolpyruvate_carboxykinase1/-	zma:542333/zma:100192478/zma:100280823/zma:100193279/zma:100037812/zma:542651/zma:541622/zma:100282868	8	7	gene:Zm00001d051001/gene:Zm00001d008816/gene:Zm00001d012407/gene:Zm00001d014945/gene:Zm00001d042869/gene:Zm00001d008651/gene:Zm00001d034617	1	gene:Zm00001d028471
zma00400	Phenylalanine, tyrosine and tryptophan biosynthesis	4/175	37/3408	0.119161	0.646876	gene:Zm00001d025333/gene:Zm00001d018969/gene:Zm00001d006242/gene:Zm00001d040850	-/tryptophan_synthase_alpha_subunit1/-/-	zma:100279620/zma:100170238/zma:100272979/zma:100285997	4	4	gene:Zm00001d025333/gene:Zm00001d018969/gene:Zm00001d006242/gene:Zm00001d040850	0
zma03050	Proteasome	5/175	53/3408	0.133591	0.654867	gene:Zm00001d016439/gene:Zm00001d007038/gene:Zm00001d003257/gene:Zm00001d017338/gene:Zm00001d048271	-/-/-/-/-	zma:100273032/zma:100383475/zma:100282612/zma:100193683/zma:100191154	5	5	gene:Zm00001d016439/gene:Zm00001d007038/gene:Zm00001d003257/gene:Zm00001d017338/gene:Zm00001d048271	0
zma04626	Plant-pathogen interaction	10/175	132/3408	0.137867	0.654867	gene:Zm00001d024903/gene:Zm00001d026018/gene:Zm00001d002540/gene:Zm00001d003048/gene:Zm00001d041719/gene:Zm00001d018233/gene:Zm00001d028514/gene:Zm00001d027480/gene:Zm00001d015100/gene:Zm00001d051502	heat_shock_protein%2C_90_kDa/calcium_dependent_protein_kinase4/calcium_dependent_protein_kinase5/-/-/-/MAP_kinase_kinase_kinase11/-/-/calcium_dependent_protein_kinase7	zma:100196928/zma:100384476/zma:542224/zma:103646229/zma:100286003/zma:103627804/zma:100272734/zma:100383301/zma:100217278/zma:103653932	10	10	gene:Zm00001d024903/gene:Zm00001d026018/gene:Zm00001d002540/gene:Zm00001d003048/gene:Zm00001d041719/gene:Zm00001d018233/gene:Zm00001d028514/gene:Zm00001d027480/gene:Zm00001d015100/gene:Zm00001d051502	0
zma00380	Tryptophan metabolism	3/175	27/3408	0.158583	0.669571	gene:Zm00001d024665/gene:Zm00001d039323/gene:Zm00001d024664	-/-/-	zma:100383025/zma:103649553/zma:100279950	3	2	gene:Zm00001d024665/gene:Zm00001d024664	1	gene:Zm00001d039323
zma00600	Sphingolipid metabolism	3/175	27/3408	0.158583	0.669571	gene:Zm00001d043994/gene:Zm00001d017912/gene:Zm00001d028443	-/-/-	zma:103651403/zma:100216857/zma:103633646	3	3	gene:Zm00001d043994/gene:Zm00001d017912/gene:Zm00001d028443	0
zma00250	Alanine, aspartate and glutamate metabolism	4/175	43/3408	0.176936	0.676524	gene:Zm00001d044646/gene:Zm00001d047981/gene:Zm00001d027861/gene:Zm00001d044608	glucosamine_fructose-6-phosphate_aminotransferase1/-/-/asparagine_synthetase2	zma:100194010/zma:100381655/zma:103631778/zma:100192349	4	4	gene:Zm00001d044646/gene:Zm00001d047981/gene:Zm00001d027861/gene:Zm00001d044608	0
zma00760	Nicotinate and nicotinamide metabolism	2/175	15/3408	0.178033	0.676524	gene:Zm00001d025412/gene:Zm00001d034725	-/-	zma:100286133/zma:100193647	2	2	gene:Zm00001d025412/gene:Zm00001d034725	0
zma00053	Ascorbate and aldarate metabolism	3/175	30/3408	0.197603	0.684021	gene:Zm00001d046234/gene:Zm00001d049954/gene:Zm00001d014674	-/-/-	zma:100273421/zma:100382120/zma:100382378	3	3	gene:Zm00001d046234/gene:Zm00001d049954/gene:Zm00001d014674	0
zma00710	Carbon fixation in photosynthetic organisms	4/175	45/3408	0.198006	0.684021	gene:Zm00001d051001/gene:Zm00001d012407/gene:Zm00001d016166/gene:Zm00001d028471	glyceraldehyde-3-phosphate_dehydrogenase3/triose_phosphate_isomerase5/phosphoenolpyruvate_carboxylase2/phosphoenolpyruvate_carboxykinase1	zma:542333/zma:100280823/zma:542479/zma:541622	4	3	gene:Zm00001d051001/gene:Zm00001d012407/gene:Zm00001d016166	1	gene:Zm00001d028471
zma00790	Folate biosynthesis	2/175	17/3408	0.216132	0.700075	gene:Zm00001d016902/gene:Zm00001d016866	-/-	zma:100304324/zma:100272516	2	2	gene:Zm00001d016902/gene:Zm00001d016866	0
zma00500	Starch and sucrose metabolism	7/175	96/3408	0.221076	0.700075	gene:Zm00001d005658/gene:Zm00001d024821/gene:Zm00001d006539/gene:Zm00001d045042/gene:Zm00001d014083/gene:Zm00001d012036/gene:Zm00001d047077	trehalose-6-phosphate_phosphatase2/sucrose-phosphatase2/-/shrunken1/-/sucrose_phosphate_synthase1/-	zma:107546758/zma:542661/zma:100382206/zma:542365/zma:100281141/zma:542711/zma:100502394	7	2	gene:Zm00001d024821/gene:Zm00001d045042	5	gene:Zm00001d005658/gene:Zm00001d006539/gene:Zm00001d014083/gene:Zm00001d012036/gene:Zm00001d047077
zma00565	Ether lipid metabolism	2/175	18/3408	0.235458	0.715791	gene:Zm00001d046508/gene:Zm00001d013461	phospholipase_D6/-	zma:100279815/zma:100191566	2	0		2	gene:Zm00001d046508/gene:Zm00001d013461
zma00564	Glycerophospholipid metabolism	6/175	84/3408	0.260885	0.75856	gene:Zm00001d043267/gene:Zm00001d010670/gene:Zm00001d011638/gene:Zm00001d038389/gene:Zm00001d046508/gene:Zm00001d013461	-/-/-/-/phospholipase_D6/-	zma:100304330/zma:100191807/zma:100502288/zma:100279857/zma:100279815/zma:100191566	6	4	gene:Zm00001d043267/gene:Zm00001d010670/gene:Zm00001d011638/gene:Zm00001d038389	2	gene:Zm00001d046508/gene:Zm00001d013461
zma01230	Biosynthesis of amino acids	11/175	174/3408	0.279361	0.75856	gene:Zm00001d053960/gene:Zm00001d051001/gene:Zm00001d008816/gene:Zm00001d012407/gene:Zm00001d048358/gene:Zm00001d025333/gene:Zm00001d008244/gene:Zm00001d018969/gene:Zm00001d006242/gene:Zm00001d040850/gene:Zm00001d044608	-/glyceraldehyde-3-phosphate_dehydrogenase3/-/triose_phosphate_isomerase5/aconitase3/-/-/tryptophan_synthase_alpha_subunit1/-/-/asparagine_synthetase2	zma:100193712/zma:542333/zma:100192478/zma:100280823/zma:100304315/zma:100279620/zma:100283574/zma:100170238/zma:100272979/zma:100285997/zma:100192349	11	11	gene:Zm00001d053960/gene:Zm00001d051001/gene:Zm00001d008816/gene:Zm00001d012407/gene:Zm00001d048358/gene:Zm00001d025333/gene:Zm00001d008244/gene:Zm00001d018969/gene:Zm00001d006242/gene:Zm00001d040850/gene:Zm00001d044608	0
zma00052	Galactose metabolism	3/175	36/3408	0.280967	0.75856	gene:Zm00001d008816/gene:Zm00001d014674/gene:Zm00001d031300	-/-/-	zma:100192478/zma:100382378/zma:606431	3	3	gene:Zm00001d008816/gene:Zm00001d014674/gene:Zm00001d031300	0
zma00270	Cysteine and methionine metabolism	5/175	70/3408	0.28945	0.75856	gene:Zm00001d002592/gene:Zm00001d014945/gene:Zm00001d007661/gene:Zm00001d024852/gene:Zm00001d027861	1-aminocyclopropane-1-carboxylate_synthase2/-/-/1-aminocyclopropane-1-carboxylate_oxidase3/-	zma:103646045/zma:100193279/zma:100273590/zma:103641391/zma:103631778	5	5	gene:Zm00001d002592/gene:Zm00001d014945/gene:Zm00001d007661/gene:Zm00001d024852/gene:Zm00001d027861	0
zma01210	2-Oxocarboxylic acid metabolism	3/175	39/3408	0.323914	0.814805	gene:Zm00001d053960/gene:Zm00001d048358/gene:Zm00001d008244	-/aconitase3/-	zma:100193712/zma:100304315/zma:100283574	3	3	gene:Zm00001d053960/gene:Zm00001d048358/gene:Zm00001d008244	0
zma00910	Nitrogen metabolism	2/175	23/3408	0.332355	0.814805	gene:Zm00001d052551/gene:Zm00001d011679	-/-	zma:100384165/zma:103636218	2	0		2	gene:Zm00001d052551/gene:Zm00001d011679
zma00562	Inositol phosphate metabolism	4/175	59/3408	0.359484	0.820277	gene:Zm00001d037731/gene:Zm00001d012407/gene:Zm00001d046234/gene:Zm00001d034617	-/triose_phosphate_isomerase5/-/-	zma:103630133/zma:100280823/zma:100273421/zma:100282868	4	3	gene:Zm00001d012407/gene:Zm00001d046234/gene:Zm00001d034617	1	gene:Zm00001d037731
zma00410	beta-Alanine metabolism	2/175	25/3408	0.370346	0.820277	gene:Zm00001d025103/gene:Zm00001d047981	-/-	zma:103641531/zma:100381655	2	1	gene:Zm00001d047981	1	gene:Zm00001d025103
zma00561	Glycerolipid metabolism	4/175	60/3408	0.371395	0.820277	gene:Zm00001d043267/gene:Zm00001d042869/gene:Zm00001d011638/gene:Zm00001d038389	-/-/-/-	zma:100304330/zma:100037812/zma:100502288/zma:100279857	4	4	gene:Zm00001d043267/gene:Zm00001d042869/gene:Zm00001d011638/gene:Zm00001d038389	0
zma00260	Glycine, serine and threonine metabolism	3/175	43/3408	0.381145	0.820277	gene:Zm00001d025103/gene:Zm00001d018969/gene:Zm00001d027861	-/tryptophan_synthase_alpha_subunit1/-	zma:103641531/zma:100170238/zma:103631778	3	2	gene:Zm00001d018969/gene:Zm00001d027861	1	gene:Zm00001d025103
zma00920	Sulfur metabolism	2/175	26/3408	0.389028	0.820277	gene:Zm00001d038625/gene:Zm00001d031617	sulfite_reductase1/sulfite_oxidase1	zma:542221/zma:103642918	2	2	gene:Zm00001d038625/gene:Zm00001d031617	0
zma00051	Fructose and mannose metabolism	3/175	45/3408	0.409418	0.820277	gene:Zm00001d008816/gene:Zm00001d012407/gene:Zm00001d007113	-/triose_phosphate_isomerase5/-	zma:100192478/zma:100280823/zma:100194385	3	2	gene:Zm00001d008816/gene:Zm00001d012407	1	gene:Zm00001d007113
zma04933	AGE-RAGE signaling pathway in diabetic complications	1/175	10/3408	0.410138	0.820277	gene:Zm00001d015036	Rho-related_protein_from_plants_9	zma:542094	1	0		1	gene:Zm00001d015036
zma04122	Sulfur relay system	1/175	11/3408	0.440517	0.84928	gene:Zm00001d016866	-	zma:100272516	1	1	gene:Zm00001d016866	0
zma00020	Citrate cycle (TCA cycle)	3/175	48/3408	0.451054	0.84928	gene:Zm00001d048358/gene:Zm00001d008244/gene:Zm00001d028471	aconitase3/-/phosphoenolpyruvate_carboxykinase1	zma:100304315/zma:100283574/zma:541622	3	2	gene:Zm00001d048358/gene:Zm00001d008244	1	gene:Zm00001d028471
zma00908	Zeatin biosynthesis	1/175	12/3408	0.469339	0.84928	gene:Zm00001d002707	-	zma:100273251	1	1	gene:Zm00001d002707	0
zma00960	Tropane, piperidine and pyridine alkaloid biosynthesis	1/175	12/3408	0.469339	0.84928	gene:Zm00001d025103	-	zma:103641531	1	0		1	gene:Zm00001d025103
zma04016	MAPK signaling pathway - plant	6/175	108/3408	0.482754	0.85324	gene:Zm00001d002592/gene:Zm00001d038852/gene:Zm00001d015829/gene:Zm00001d019734/gene:Zm00001d028514/gene:Zm00001d015100	1-aminocyclopropane-1-carboxylate_synthase2/reversion-to-ethylene_sensitivity1_like3/-/AP2-EREBP-transcription_factor_177/MAP_kinase_kinase_kinase11/-	zma:103646045/zma:100276634/zma:103626849/zma:100191919/zma:100272734/zma:100217278	6	6	gene:Zm00001d002592/gene:Zm00001d038852/gene:Zm00001d015829/gene:Zm00001d019734/gene:Zm00001d028514/gene:Zm00001d015100	0
zma00740	Riboflavin metabolism	1/175	13/3408	0.496685	0.85791	gene:Zm00001d016902	-	zma:100304324	1	1	gene:Zm00001d016902	0
zma00073	Cutin, suberine and wax biosynthesis	1/175	14/3408	0.522629	0.882662	gene:Zm00001d027837	male_sterile26	zma:100191749	1	0		1	gene:Zm00001d027837
zma00290	Valine, leucine and isoleucine biosynthesis	1/175	15/3408	0.547243	0.90414	gene:Zm00001d053960	-	zma:100193712	1	1	gene:Zm00001d053960	0
zma00620	Pyruvate metabolism	3/175	58/3408	0.5796	0.932083	gene:Zm00001d016166/gene:Zm00001d014945/gene:Zm00001d028471	phosphoenolpyruvate_carboxylase2/-/phosphoenolpyruvate_carboxykinase1	zma:542479/zma:100193279/zma:541622	3	2	gene:Zm00001d016166/gene:Zm00001d014945	1	gene:Zm00001d028471
zma00940	Phenylpropanoid biosynthesis	5/175	101/3408	0.599815	0.932083	gene:Zm00001d002346/gene:Zm00001d047358/gene:Zm00001d024752/gene:Zm00001d045043/gene:Zm00001d053554	cinnamyl_alcohol_dehydrogenase1/-/-/-/-	zma:100191885/zma:103639086/zma:100273104/zma:100192586/zma:100191769	5	3	gene:Zm00001d024752/gene:Zm00001d045043/gene:Zm00001d053554	2	gene:Zm00001d002346/gene:Zm00001d047358
zma04144	Endocytosis	6/175	123/3408	0.612541	0.932083	gene:Zm00001d012420/gene:Zm00001d042922/gene:Zm00001d028630/gene:Zm00001d040202/gene:Zm00001d047799/gene:Zm00001d046508	heat_shock_protein1/-/-/-/-/phospholipase_D6	zma:100501536/zma:103651028/zma:100281806/zma:100273036/zma:100272911/zma:100279815	6	4	gene:Zm00001d012420/gene:Zm00001d042922/gene:Zm00001d028630/gene:Zm00001d047799	2	gene:Zm00001d040202/gene:Zm00001d046508
zma00650	Butanoate metabolism	1/175	18/3408	0.613766	0.932083	gene:Zm00001d047981	-	zma:100381655	1	1	gene:Zm00001d047981	0
zma04146	Peroxisome	3/175	62/3408	0.625477	0.932083	gene:Zm00001d026290/gene:Zm00001d002260/gene:Zm00001d011119	-/-/-	zma:103504713/zma:100285987/zma:100283640	3	3	gene:Zm00001d026290/gene:Zm00001d002260/gene:Zm00001d011119	0
zma00770	Pantothenate and CoA biosynthesis	1/175	21/3408	0.670562	0.934607	gene:Zm00001d008976	-	zma:100283732	1	1	gene:Zm00001d008976	0
zma04145	Phagosome	3/175	68/3408	0.687675	0.934607	gene:Zm00001d006651/gene:Zm00001d015036/gene:Zm00001d013367	alpha_tubulin5/Rho-related_protein_from_plants_9/alpha_tubulin4	zma:542248/zma:542094/zma:100381303	3	0		3	gene:Zm00001d006651/gene:Zm00001d015036/gene:Zm00001d013367
zma00630	Glyoxylate and dicarboxylate metabolism	2/175	46/3408	0.693206	0.934607	gene:Zm00001d048358/gene:Zm00001d002260	aconitase3/-	zma:100304315/zma:100285987	2	2	gene:Zm00001d048358/gene:Zm00001d002260	0
zma00190	Oxidative phosphorylation	4/175	93/3408	0.712922	0.934607	gene:Zm00001d006714/gene:Zm00001d014428/gene:Zm00001d010171/gene:Zm00001d014772	-/-/-/-	zma:100193844/zma:100192845/zma:100272302/zma:100282004	4	3	gene:Zm00001d006714/gene:Zm00001d010171/gene:Zm00001d014772	1	gene:Zm00001d014428
zma03040	Spliceosome	7/175	159/3408	0.719029	0.934607	gene:Zm00001d012420/gene:Zm00001d042922/gene:Zm00001d047859/gene:Zm00001d028630/gene:Zm00001d038914/gene:Zm00001d035170/gene:Zm00001d047799	heat_shock_protein1/-/male_sterile45/-/-/-/-	zma:100501536/zma:103651028/zma:100273898/zma:100281806/zma:100284021/zma:103629005/zma:100272911	7	7	gene:Zm00001d012420/gene:Zm00001d042922/gene:Zm00001d047859/gene:Zm00001d028630/gene:Zm00001d038914/gene:Zm00001d035170/gene:Zm00001d047799	0
zma01200	Carbon metabolism	8/175	183/3408	0.734269	0.934607	gene:Zm00001d051001/gene:Zm00001d008816/gene:Zm00001d012407/gene:Zm00001d016166/gene:Zm00001d048358/gene:Zm00001d002260/gene:Zm00001d008244/gene:Zm00001d028471	glyceraldehyde-3-phosphate_dehydrogenase3/-/triose_phosphate_isomerase5/phosphoenolpyruvate_carboxylase2/aconitase3/-/-/phosphoenolpyruvate_carboxykinase1	zma:542333/zma:100192478/zma:100280823/zma:542479/zma:100304315/zma:100285987/zma:100283574/zma:541622	8	7	gene:Zm00001d051001/gene:Zm00001d008816/gene:Zm00001d012407/gene:Zm00001d016166/gene:Zm00001d048358/gene:Zm00001d002260/gene:Zm00001d008244	1	gene:Zm00001d028471
zma00195	Photosynthesis	2/175	51/3408	0.746626	0.934607	gene:Zm00001d011833/gene:Zm00001d025874	-/-	zma:100282643/zma:100278127	2	1	gene:Zm00001d025874	1	gene:Zm00001d011833
zma00071	Fatty acid degradation	1/175	26/3408	0.747358	0.934607	gene:Zm00001d027837	male_sterile26	zma:100191749	1	0		1	gene:Zm00001d027837
zma00640	Propanoate metabolism	1/175	26/3408	0.747358	0.934607	gene:Zm00001d014945	-	zma:100193279	1	1	gene:Zm00001d014945	0
zma03018	RNA degradation	3/175	75/3408	0.750145	0.934607	gene:Zm00001d038857/gene:Zm00001d008816/gene:Zm00001d038914	-/-/-	zma:100272259/zma:100192478/zma:100284021	3	3	gene:Zm00001d038857/gene:Zm00001d008816/gene:Zm00001d038914	0
zma04130	SNARE interactions in vesicular transport	1/175	28/3408	0.772831	0.936694	gene:Zm00001d031641	-	zma:100285634	1	0		1	gene:Zm00001d031641
zma00941	Flavonoid biosynthesis	1/175	29/3408	0.784593	0.936694	gene:Zm00001d043752	-	zma:100304381	1	1	gene:Zm00001d043752	0
zma04070	Phosphatidylinositol signaling system	2/175	56/3408	0.791909	0.936694	gene:Zm00001d037731/gene:Zm00001d015100	-/-	zma:103630133/zma:100217278	2	1	gene:Zm00001d015100	1	gene:Zm00001d037731
zma00280	Valine, leucine and isoleucine degradation	1/175	31/3408	0.80633	0.936694	gene:Zm00001d027861	-	zma:103631778	1	1	gene:Zm00001d027861	0
zma00061	Fatty acid biosynthesis	1/175	34/3408	0.834913	0.936694	gene:Zm00001d046454	fatty_acyl_thioesterase1	zma:100281497	1	1	gene:Zm00001d046454	0
zma00330	Arginine and proline metabolism	1/175	35/3408	0.843476	0.936694	gene:Zm00001d025644	-	zma:100280344	1	0		1	gene:Zm00001d025644
zma00970	Aminoacyl-tRNA biosynthesis	1/175	38/3408	0.866603	0.936694	gene:Zm00001d032667	-	zma:103643444	1	0		1	gene:Zm00001d032667
zma00030	Pentose phosphate pathway	1/175	39/3408	0.87353	0.936694	gene:Zm00001d008816	-	zma:100192478	1	1	gene:Zm00001d008816	0
zma03060	Protein export	1/175	39/3408	0.87353	0.936694	gene:Zm00001d026521	-	zma:100384465	1	0		1	gene:Zm00001d026521
zma00520	Amino sugar and nucleotide sugar metabolism	3/175	95/3408	0.875069	0.936694	gene:Zm00001d006210/gene:Zm00001d044646/gene:Zm00001d014674	-/glucosamine_fructose-6-phosphate_aminotransferase1/-	zma:103647616/zma:100194010/zma:100382378	3	3	gene:Zm00001d006210/gene:Zm00001d044646/gene:Zm00001d014674	0
zma01212	Fatty acid metabolism	1/175	47/3408	0.917499	0.968471	gene:Zm00001d046454	fatty_acyl_thioesterase1	zma:100281497	1	1	gene:Zm00001d046454	0
zma04120	Ubiquitin mediated proteolysis	2/175	100/3408	0.968793	0.999976	gene:Zm00001d051483/gene:Zm00001d043998	-/-	zma:103653924/zma:100280571	2	1	gene:Zm00001d043998	1	gene:Zm00001d051483
zma03015	mRNA surveillance pathway	2/175	115/3408	0.984397	0.999976	gene:Zm00001d017215/gene:Zm00001d007839	-/-	zma:100383610/zma:100192067	2	1	gene:Zm00001d007839	1	gene:Zm00001d017215
zma03013	RNA transport	1/175	123/3408	0.998648	0.999976	gene:Zm00001d021788	-	zma:100284707	1	1	gene:Zm00001d021788	0
zma03010	Ribosome	2/175	244/3408	0.999976	0.999976	gene:Zm00001d042323/gene:Zm00001d007819	-/-	zma:103650839/zma:100281004	2	2	gene:Zm00001d042323/gene:Zm00001d007819	0
